# Supplementary material for: From Genome to Gene Expression: The Genomic Landscape of a Hybrid Species of Eucalyptus urophylla × Eucalyptus grandis and Its Divergence from Parental Species Hybrid
Source: Research Square preprint supplement (doi:10.21203/rs.3.rs-6912338/v1), 2025-07-02
Supplement: Supplementary file 1 [file 2e7e9779532e8b49a51a147f.xlsx]

## Sheet: Table S1
Table S1. Assembly statistics of E. urograndis genome
Parameters	Contig		Scaffold
	SOAPdenovo	After Hi-C	SOAPdenovo	After Hi-C
Total number of scaffolds	3054117	511	1553947	92
Assembly size (bp)	691030338	591878112	903562646	592087612
Gap (bp)	0	0	212532308	209500
N50 (bp)	331	3727504	1632	58620852
N90 (bp)	106	950339	164	40119982
Maximum length (bp)	18408	12704629	83053	72112381
Minimum length (bp)	43	1380	100	1380
GC content (%)	39.19	39.44	39.19	39.44

## Sheet: Table S2
Table S2. Results of NT comparison
Rank	Species	Number	Percentage
1	Eucalyptus grandis	988	9.88
2	Eucalyptus globulus	300	3
3	Eucalyptus nitens	293	2.93
4	Eucalyptus camaldulensis	293	2.93
5	Eucalyptus deglupta	289	2.89
6	Eucalyptus umbra	289	2.89

## Sheet: Table S3
Table S3. Results of BUSCO assessment of genome assembly
	Gene number		Percentage
	Assembly	Annotation	Assembly	Annotation
Complete BUSCOs	1338	1346.4	0.9292	0.935
Complete and single-copy BUSCOs (S)	1276	1278.72	0.8861	0.888
Complete and duplicated BUSCOs (D)	62	67.68	0.0431	0.047
Fragmented BUSCOs (F)	29	21.6	0.0201	0.015
Missing BUSCOs (M)	73	72	0.0507	0.05
Total BUSCO groups searched	1440	1440	1	1

## Sheet: Table S4
Table S4. The lengths of 11 chromosomes in the E. urograndis genome
Chromosome ID	Length (bp)	Percentage (%)
1	72112381	12.18
2	68257456	11.53
3	66861454	11.29
4	60394840	10.2
5	58620852	9.9
6	56347783	9.52
7	44998019	7.6
8	43783238	7.39
9	40485881	6.84
10	40119982	6.78
11	39561427	6.68
Total	591543313	99.91
Unkown	544299	0.09

## Sheet: Table S5
Table S5. Statistics results of repetitive sequences
Methods	Repeat Size(bp)	% of genome
TRF (Tandem repeat finder)	24122754	4.08
RepeatMasker	46804570	7.9
RepeatProteinMask	48919216	8.26
De novo	264605321	44.7
Total	281022591	47.48
Types of Transposable element	Combined TEs
	Length(bp)	% of genome
DNA	43554223	7.36
LINE	17727811	3
SINE	321358	0.05
LTR	205247473	34.68
Others	5080	0
Unknown	11785031	1.99
Total	266417177	45.01

## Sheet: Table S6
Table S6. Statistical results of non-coding RNA
Type		Copy(w*)	Average length(bp)	Total length(bp)	% of genome
miRNA		994	94.2	93638	0.0158
tRNA		538	74.71	40196	0.0068
rRNA	rRNA	747	217.13	162195	0.0274
	18S	170	524.36	89142	0.0151
	28S	170	136.86	23266	0.0039
	5.8S	42	154.38	6484	0.0011
	5S	365	118.64	43303	0.0073
snRNA	snRNA	141	143.45	20226	0.0034
	splicing	141	143.45	20226	0.0034
snoRNA	snoRNA	297	104.79	31003	0.0053
	C/D-box	253	100.6	25452	0.0043
	H/ACA-box	44	128.89	5671	0.001

## Sheet: Table S7
Table S7. Statistical results of gene structure prediction
Gene set		Gene numbers	Gene length (bp)	CDS length (bp)	Exon length (bp)	Intron length (bp)	Exons per gene
Homolog	Eucalyptus grandis	35724	3974.39	1310.09	265.23	676.33	4.94
	Punica granatum	23798	2779.19	1340.74	245.56	322.54	5.46
	Populus trichocarpa	42713	2496.3	1113.02	241.48	383.26	4.61
	Hevea brasiliensis	35188	4117.58	1319.77	246.74	643.34	5.35
De novo	Augustus	80021	4088.11	1224.74	241.68	703.96	5.07
	Genscan	89095	4742.99	1168.62	204.48	758.08	5.72
Transcript	StringTie	60531	5774.6	1044.39	258.81	1558.37	4.04
Eucalyptus urograndis (GLEAN)		32151	4776.8	1322.38	265.25	866.77	4.99

## Sheet: Table S8
Table S8. GO enrichement analysis of all the E. uorgrandis genes
id	Number of genes	per	class	ID	Descrption
GO:0000003 reproduction	184	1.422	Biological Process	GO:0000003	reproduction
GO:0000018 regulation of DNA recombination	2	0.015	Biological Process	GO:0000018	regulation of DNA recombination
GO:0000027 ribosomal large subunit assembly	2	0.015	Biological Process	GO:0000027	ribosomal large subunit assembly
GO:0000038 very long-chain fatty acid metabolic process	1	0.008	Biological Process	GO:0000038	very long-chain fatty acid metabolic process
GO:0000041 transition metal ion transport	19	0.147	Biological Process	GO:0000041	transition metal ion transport
GO:0000042 protein targeting to Golgi	1	0.008	Biological Process	GO:0000042	protein targeting to Golgi
GO:0000070 mitotic sister chromatid segregation	44	0.34	Biological Process	GO:0000070	mitotic sister chromatid segregation
GO:0000075 cell cycle checkpoint	25	0.193	Biological Process	GO:0000075	cell cycle checkpoint
GO:0000076 DNA replication checkpoint	1	0.008	Biological Process	GO:0000076	DNA replication checkpoint
GO:0000077 DNA damage checkpoint	17	0.131	Biological Process	GO:0000077	DNA damage checkpoint
GO:0000079 regulation of cyclin-dependent protein serine/threonine kinase activity	5	0.039	Biological Process	GO:0000079	regulation of cyclin-dependent protein serine/threonine kinase activity
GO:0000086 G2/M transition of mitotic cell cycle	1	0.008	Biological Process	GO:0000086	G2/M transition of mitotic cell cycle
GO:0000087 mitotic M phase	1	0.008	Biological Process	GO:0000087	mitotic M phase
GO:0000090 mitotic anaphase	1	0.008	Biological Process	GO:0000090	mitotic anaphase
GO:0000096 sulfur amino acid metabolic process	34	0.263	Biological Process	GO:0000096	sulfur amino acid metabolic process
GO:0000097 sulfur amino acid biosynthetic process	30	0.232	Biological Process	GO:0000097	sulfur amino acid biosynthetic process
GO:0000098 sulfur amino acid catabolic process	2	0.015	Biological Process	GO:0000098	sulfur amino acid catabolic process
GO:0000103 sulfate assimilation	2	0.015	Biological Process	GO:0000103	sulfate assimilation
GO:0000105 histidine biosynthetic process	7	0.054	Biological Process	GO:0000105	histidine biosynthetic process
GO:0000154 rRNA modification	7	0.054	Biological Process	GO:0000154	rRNA modification
GO:0000160 phosphorelay signal transduction system	61	0.472	Biological Process	GO:0000160	phosphorelay signal transduction system
GO:0000162 tryptophan biosynthetic process	5	0.039	Biological Process	GO:0000162	tryptophan biosynthetic process
GO:0000184 nuclear-transcribed mRNA catabolic process, nonsense-mediated decay	3	0.023	Biological Process	GO:0000184	nuclear-transcribed mRNA catabolic process, nonsense-mediated decay
GO:0000226 microtubule cytoskeleton organization	28	0.216	Biological Process	GO:0000226	microtubule cytoskeleton organization
GO:0000244 spliceosomal tri-snRNP complex assembly	1	0.008	Biological Process	GO:0000244	spliceosomal tri-snRNP complex assembly
GO:0000245 spliceosomal complex assembly	4	0.031	Biological Process	GO:0000245	spliceosomal complex assembly
GO:0000266 mitochondrial fission	3	0.023	Biological Process	GO:0000266	mitochondrial fission
GO:0000271 polysaccharide biosynthetic process	99	0.765	Biological Process	GO:0000271	polysaccharide biosynthetic process
GO:0000272 polysaccharide catabolic process	9	0.07	Biological Process	GO:0000272	polysaccharide catabolic process
GO:0000278 mitotic cell cycle	58	0.448	Biological Process	GO:0000278	mitotic cell cycle
GO:0000279 M phase	1	0.008	Biological Process	GO:0000279	M phase
GO:0000280 nuclear division	50	0.386	Biological Process	GO:0000280	nuclear division
GO:0000281 mitotic cytokinesis	1	0.008	Biological Process	GO:0000281	mitotic cytokinesis
GO:0000288 nuclear-transcribed mRNA catabolic process, deadenylation-dependent decay	2	0.015	Biological Process	GO:0000288	nuclear-transcribed mRNA catabolic process, deadenylation-dependent decay
GO:0000290 deadenylation-dependent decapping of nuclear-transcribed mRNA	2	0.015	Biological Process	GO:0000290	deadenylation-dependent decapping of nuclear-transcribed mRNA
GO:0000301 retrograde transport, vesicle recycling within Golgi	1	0.008	Biological Process	GO:0000301	retrograde transport, vesicle recycling within Golgi
GO:0000302 response to reactive oxygen species	1	0.008	Biological Process	GO:0000302	response to reactive oxygen species
GO:0000303 response to superoxide	1	0.008	Biological Process	GO:0000303	response to superoxide
GO:0000305 response to oxygen radical	1	0.008	Biological Process	GO:0000305	response to oxygen radical
GO:0000375 RNA splicing, via transesterification reactions	43	0.332	Biological Process	GO:0000375	RNA splicing, via transesterification reactions
GO:0000377 RNA splicing, via transesterification reactions with bulged adenosine as nucleophile	43	0.332	Biological Process	GO:0000377	RNA splicing, via transesterification reactions with bulged adenosine as nucleophile
GO:0000387 spliceosomal snRNP assembly	5	0.039	Biological Process	GO:0000387	spliceosomal snRNP assembly
GO:0000390 spliceosomal complex disassembly	1	0.008	Biological Process	GO:0000390	spliceosomal complex disassembly
GO:0000394 RNA splicing, via endonucleolytic cleavage and ligation	4	0.031	Biological Process	GO:0000394	RNA splicing, via endonucleolytic cleavage and ligation
GO:0000398 mRNA splicing, via spliceosome	43	0.332	Biological Process	GO:0000398	mRNA splicing, via spliceosome
GO:0000413 protein peptidyl-prolyl isomerization	35	0.271	Biological Process	GO:0000413	protein peptidyl-prolyl isomerization
GO:0000723 telomere maintenance	7	0.054	Biological Process	GO:0000723	telomere maintenance
GO:0000724 double-strand break repair via homologous recombination	5	0.039	Biological Process	GO:0000724	double-strand break repair via homologous recombination
GO:0000725 recombinational repair	5	0.039	Biological Process	GO:0000725	recombinational repair
GO:0000726 non-recombinational repair	4	0.031	Biological Process	GO:0000726	non-recombinational repair
GO:0000737 DNA catabolic process, endonucleolytic	3	0.023	Biological Process	GO:0000737	DNA catabolic process, endonucleolytic
GO:0000819 sister chromatid segregation	44	0.34	Biological Process	GO:0000819	sister chromatid segregation
GO:0000910 cytokinesis	9	0.07	Biological Process	GO:0000910	cytokinesis
GO:0000917 barrier septum assembly	1	0.008	Biological Process	GO:0000917	barrier septum assembly
GO:0000956 nuclear-transcribed mRNA catabolic process	6	0.046	Biological Process	GO:0000956	nuclear-transcribed mRNA catabolic process
GO:0001101 response to acid chemical	65	0.502	Biological Process	GO:0001101	response to acid chemical
GO:0001510 RNA methylation	9	0.07	Biological Process	GO:0001510	RNA methylation
GO:0001522 pseudouridine synthesis	36	0.278	Biological Process	GO:0001522	pseudouridine synthesis
GO:0001678 cellular glucose homeostasis	6	0.046	Biological Process	GO:0001678	cellular glucose homeostasis
GO:0001682 tRNA 5'-leader removal	1	0.008	Biological Process	GO:0001682	tRNA 5'-leader removal
GO:0001763 morphogenesis of a branching structure	3	0.023	Biological Process	GO:0001763	morphogenesis of a branching structure
GO:0001932 regulation of protein phosphorylation	11	0.085	Biological Process	GO:0001932	regulation of protein phosphorylation
GO:0001934 positive regulation of protein phosphorylation	6	0.046	Biological Process	GO:0001934	positive regulation of protein phosphorylation
GO:0002218 activation of innate immune response	2	0.015	Biological Process	GO:0002218	activation of innate immune response
GO:0002252 immune effector process	2	0.015	Biological Process	GO:0002252	immune effector process
GO:0002253 activation of immune response	2	0.015	Biological Process	GO:0002253	activation of immune response
GO:0002376 immune system process	9	0.07	Biological Process	GO:0002376	immune system process
GO:0002682 regulation of immune system process	6	0.046	Biological Process	GO:0002682	regulation of immune system process
GO:0002684 positive regulation of immune system process	2	0.015	Biological Process	GO:0002684	positive regulation of immune system process
GO:0002831 regulation of response to biotic stimulus	4	0.031	Biological Process	GO:0002831	regulation of response to biotic stimulus
GO:0003002 regionalization	1	0.008	Biological Process	GO:0003002	regionalization
GO:0003006 developmental process involved in reproduction	2	0.015	Biological Process	GO:0003006	developmental process involved in reproduction
GO:0003333 amino acid transmembrane transport	30	0.232	Biological Process	GO:0003333	amino acid transmembrane transport
GO:0005975 carbohydrate metabolic process	844	6.524	Biological Process	GO:0005975	carbohydrate metabolic process
GO:0005976 polysaccharide metabolic process	149	1.152	Biological Process	GO:0005976	polysaccharide metabolic process
GO:0005977 glycogen metabolic process	13	0.1	Biological Process	GO:0005977	glycogen metabolic process
GO:0005978 glycogen biosynthetic process	13	0.1	Biological Process	GO:0005978	glycogen biosynthetic process
GO:0005982 starch metabolic process	2	0.015	Biological Process	GO:0005982	starch metabolic process
GO:0005983 starch catabolic process	1	0.008	Biological Process	GO:0005983	starch catabolic process
GO:0005984 disaccharide metabolic process	46	0.356	Biological Process	GO:0005984	disaccharide metabolic process
GO:0005985 sucrose metabolic process	27	0.209	Biological Process	GO:0005985	sucrose metabolic process
GO:0005986 sucrose biosynthetic process	2	0.015	Biological Process	GO:0005986	sucrose biosynthetic process
GO:0005991 trehalose metabolic process	19	0.147	Biological Process	GO:0005991	trehalose metabolic process
GO:0005992 trehalose biosynthetic process	16	0.124	Biological Process	GO:0005992	trehalose biosynthetic process
GO:0005996 monosaccharide metabolic process	45	0.348	Biological Process	GO:0005996	monosaccharide metabolic process
GO:0006000 fructose metabolic process	1	0.008	Biological Process	GO:0006000	fructose metabolic process
GO:0006003 fructose 2,6-bisphosphate metabolic process	1	0.008	Biological Process	GO:0006003	fructose 2,6-bisphosphate metabolic process
GO:0006006 glucose metabolic process	24	0.186	Biological Process	GO:0006006	glucose metabolic process
GO:0006007 glucose catabolic process	2	0.015	Biological Process	GO:0006007	glucose catabolic process
GO:0006011 UDP-glucose metabolic process	1	0.008	Biological Process	GO:0006011	UDP-glucose metabolic process
GO:0006012 galactose metabolic process	4	0.031	Biological Process	GO:0006012	galactose metabolic process
GO:0006013 mannose metabolic process	10	0.077	Biological Process	GO:0006013	mannose metabolic process
GO:0006020 inositol metabolic process	4	0.031	Biological Process	GO:0006020	inositol metabolic process
GO:0006021 inositol biosynthetic process	1	0.008	Biological Process	GO:0006021	inositol biosynthetic process
GO:0006022 aminoglycan metabolic process	44	0.34	Biological Process	GO:0006022	aminoglycan metabolic process
GO:0006023 aminoglycan biosynthetic process	4	0.031	Biological Process	GO:0006023	aminoglycan biosynthetic process
GO:0006024 glycosaminoglycan biosynthetic process	4	0.031	Biological Process	GO:0006024	glycosaminoglycan biosynthetic process
GO:0006026 aminoglycan catabolic process	40	0.309	Biological Process	GO:0006026	aminoglycan catabolic process
GO:0006029 proteoglycan metabolic process	4	0.031	Biological Process	GO:0006029	proteoglycan metabolic process
GO:0006030 chitin metabolic process	40	0.309	Biological Process	GO:0006030	chitin metabolic process
GO:0006032 chitin catabolic process	40	0.309	Biological Process	GO:0006032	chitin catabolic process
GO:0006040 amino sugar metabolic process	40	0.309	Biological Process	GO:0006040	amino sugar metabolic process
GO:0006066 alcohol metabolic process	33	0.255	Biological Process	GO:0006066	alcohol metabolic process
GO:0006071 glycerol metabolic process	10	0.077	Biological Process	GO:0006071	glycerol metabolic process
GO:0006072 glycerol-3-phosphate metabolic process	5	0.039	Biological Process	GO:0006072	glycerol-3-phosphate metabolic process
GO:0006073 cellular glucan metabolic process	137	1.059	Biological Process	GO:0006073	cellular glucan metabolic process
GO:0006074 (1->3)-beta-D-glucan metabolic process	18	0.139	Biological Process	GO:0006074	(1->3)-beta-D-glucan metabolic process
GO:0006075 (1->3)-beta-D-glucan biosynthetic process	18	0.139	Biological Process	GO:0006075	(1->3)-beta-D-glucan biosynthetic process
GO:0006081 cellular aldehyde metabolic process	27	0.209	Biological Process	GO:0006081	cellular aldehyde metabolic process
GO:0006082 organic acid metabolic process	466	3.602	Biological Process	GO:0006082	organic acid metabolic process
GO:0006084 acetyl-CoA metabolic process	2	0.015	Biological Process	GO:0006084	acetyl-CoA metabolic process
GO:0006085 acetyl-CoA biosynthetic process	2	0.015	Biological Process	GO:0006085	acetyl-CoA biosynthetic process
GO:0006086 acetyl-CoA biosynthetic process from pyruvate	2	0.015	Biological Process	GO:0006086	acetyl-CoA biosynthetic process from pyruvate
GO:0006089 lactate metabolic process	1	0.008	Biological Process	GO:0006089	lactate metabolic process
GO:0006090 pyruvate metabolic process	65	0.502	Biological Process	GO:0006090	pyruvate metabolic process
GO:0006091 generation of precursor metabolites and energy	122	0.943	Biological Process	GO:0006091	generation of precursor metabolites and energy
GO:0006094 gluconeogenesis	16	0.124	Biological Process	GO:0006094	gluconeogenesis
GO:0006096 glycolytic process	58	0.448	Biological Process	GO:0006096	glycolytic process
GO:0006097 glyoxylate cycle	1	0.008	Biological Process	GO:0006097	glyoxylate cycle
GO:0006098 pentose-phosphate shunt	10	0.077	Biological Process	GO:0006098	pentose-phosphate shunt
GO:0006099 tricarboxylic acid cycle	8	0.062	Biological Process	GO:0006099	tricarboxylic acid cycle
GO:0006101 citrate metabolic process	8	0.062	Biological Process	GO:0006101	citrate metabolic process
GO:0006102 isocitrate metabolic process	2	0.015	Biological Process	GO:0006102	isocitrate metabolic process
GO:0006108 malate metabolic process	15	0.116	Biological Process	GO:0006108	malate metabolic process
GO:0006112 energy reserve metabolic process	13	0.1	Biological Process	GO:0006112	energy reserve metabolic process
GO:0006119 oxidative phosphorylation	5	0.039	Biological Process	GO:0006119	oxidative phosphorylation
GO:0006122 mitochondrial electron transport, ubiquinol to cytochrome c	3	0.023	Biological Process	GO:0006122	mitochondrial electron transport, ubiquinol to cytochrome c
GO:0006139 nucleobase-containing compound metabolic process	1919	14.833	Biological Process	GO:0006139	nucleobase-containing compound metabolic process
GO:0006144 purine nucleobase metabolic process	2	0.015	Biological Process	GO:0006144	purine nucleobase metabolic process
GO:0006163 purine nucleotide metabolic process	131	1.013	Biological Process	GO:0006163	purine nucleotide metabolic process
GO:0006164 purine nucleotide biosynthetic process	49	0.379	Biological Process	GO:0006164	purine nucleotide biosynthetic process
GO:0006165 nucleoside diphosphate phosphorylation	63	0.487	Biological Process	GO:0006165	nucleoside diphosphate phosphorylation
GO:0006166 purine ribonucleoside salvage	1	0.008	Biological Process	GO:0006166	purine ribonucleoside salvage
GO:0006177 GMP biosynthetic process	1	0.008	Biological Process	GO:0006177	GMP biosynthetic process
GO:0006183 GTP biosynthetic process	5	0.039	Biological Process	GO:0006183	GTP biosynthetic process
GO:0006188 IMP biosynthetic process	4	0.031	Biological Process	GO:0006188	IMP biosynthetic process
GO:0006189 'de novo' IMP biosynthetic process	2	0.015	Biological Process	GO:0006189	'de novo' IMP biosynthetic process
GO:0006206 pyrimidine nucleobase metabolic process	3	0.023	Biological Process	GO:0006206	pyrimidine nucleobase metabolic process
GO:0006207 'de novo' pyrimidine nucleobase biosynthetic process	2	0.015	Biological Process	GO:0006207	'de novo' pyrimidine nucleobase biosynthetic process
GO:0006213 pyrimidine nucleoside metabolic process	9	0.07	Biological Process	GO:0006213	pyrimidine nucleoside metabolic process
GO:0006220 pyrimidine nucleotide metabolic process	21	0.162	Biological Process	GO:0006220	pyrimidine nucleotide metabolic process
GO:0006221 pyrimidine nucleotide biosynthetic process	19	0.147	Biological Process	GO:0006221	pyrimidine nucleotide biosynthetic process
GO:0006222 UMP biosynthetic process	4	0.031	Biological Process	GO:0006222	UMP biosynthetic process
GO:0006228 UTP biosynthetic process	5	0.039	Biological Process	GO:0006228	UTP biosynthetic process
GO:0006231 dTMP biosynthetic process	4	0.031	Biological Process	GO:0006231	dTMP biosynthetic process
GO:0006233 dTDP biosynthetic process	1	0.008	Biological Process	GO:0006233	dTDP biosynthetic process
GO:0006241 CTP biosynthetic process	5	0.039	Biological Process	GO:0006241	CTP biosynthetic process
GO:0006259 DNA metabolic process	250	1.932	Biological Process	GO:0006259	DNA metabolic process
GO:0006260 DNA replication	51	0.394	Biological Process	GO:0006260	DNA replication
GO:0006261 DNA-dependent DNA replication	11	0.085	Biological Process	GO:0006261	DNA-dependent DNA replication
GO:0006265 DNA topological change	12	0.093	Biological Process	GO:0006265	DNA topological change
GO:0006266 DNA ligation	3	0.023	Biological Process	GO:0006266	DNA ligation
GO:0006269 DNA replication, synthesis of RNA primer	2	0.015	Biological Process	GO:0006269	DNA replication, synthesis of RNA primer
GO:0006270 DNA replication initiation	6	0.046	Biological Process	GO:0006270	DNA replication initiation
GO:0006271 DNA strand elongation involved in DNA replication	1	0.008	Biological Process	GO:0006271	DNA strand elongation involved in DNA replication
GO:0006273 lagging strand elongation	1	0.008	Biological Process	GO:0006273	lagging strand elongation
GO:0006275 regulation of DNA replication	2	0.015	Biological Process	GO:0006275	regulation of DNA replication
GO:0006281 DNA repair	154	1.19	Biological Process	GO:0006281	DNA repair
GO:0006282 regulation of DNA repair	2	0.015	Biological Process	GO:0006282	regulation of DNA repair
GO:0006284 base-excision repair	20	0.155	Biological Process	GO:0006284	base-excision repair
GO:0006289 nucleotide-excision repair	8	0.062	Biological Process	GO:0006289	nucleotide-excision repair
GO:0006298 mismatch repair	12	0.093	Biological Process	GO:0006298	mismatch repair
GO:0006301 postreplication repair	4	0.031	Biological Process	GO:0006301	postreplication repair
GO:0006302 double-strand break repair	11	0.085	Biological Process	GO:0006302	double-strand break repair
GO:0006303 double-strand break repair via nonhomologous end joining	4	0.031	Biological Process	GO:0006303	double-strand break repair via nonhomologous end joining
GO:0006304 DNA modification	4	0.031	Biological Process	GO:0006304	DNA modification
GO:0006305 DNA alkylation	4	0.031	Biological Process	GO:0006305	DNA alkylation
GO:0006306 DNA methylation	4	0.031	Biological Process	GO:0006306	DNA methylation
GO:0006308 DNA catabolic process	6	0.046	Biological Process	GO:0006308	DNA catabolic process
GO:0006310 DNA recombination	16	0.124	Biological Process	GO:0006310	DNA recombination
GO:0006323 DNA packaging	40	0.309	Biological Process	GO:0006323	DNA packaging
GO:0006325 chromatin organization	75	0.58	Biological Process	GO:0006325	chromatin organization
GO:0006333 chromatin assembly or disassembly	24	0.186	Biological Process	GO:0006333	chromatin assembly or disassembly
GO:0006334 nucleosome assembly	23	0.178	Biological Process	GO:0006334	nucleosome assembly
GO:0006338 chromatin remodeling	12	0.093	Biological Process	GO:0006338	chromatin remodeling
GO:0006342 chromatin silencing	1	0.008	Biological Process	GO:0006342	chromatin silencing
GO:0006348 chromatin silencing at telomere	1	0.008	Biological Process	GO:0006348	chromatin silencing at telomere
GO:0006351 transcription, DNA-templated	1108	8.565	Biological Process	GO:0006351	transcription, DNA-templated
GO:0006352 DNA-templated transcription, initiation	35	0.271	Biological Process	GO:0006352	DNA-templated transcription, initiation
GO:0006353 DNA-templated transcription, termination	5	0.039	Biological Process	GO:0006353	DNA-templated transcription, termination
GO:0006354 DNA-templated transcription, elongation	10	0.077	Biological Process	GO:0006354	DNA-templated transcription, elongation
GO:0006355 regulation of transcription, DNA-templated	992	7.668	Biological Process	GO:0006355	regulation of transcription, DNA-templated
GO:0006357 regulation of transcription from RNA polymerase II promoter	23	0.178	Biological Process	GO:0006357	regulation of transcription from RNA polymerase II promoter
GO:0006359 regulation of transcription from RNA polymerase III promoter	3	0.023	Biological Process	GO:0006359	regulation of transcription from RNA polymerase III promoter
GO:0006364 rRNA processing	29	0.224	Biological Process	GO:0006364	rRNA processing
GO:0006366 transcription from RNA polymerase II promoter	37	0.286	Biological Process	GO:0006366	transcription from RNA polymerase II promoter
GO:0006367 transcription initiation from RNA polymerase II promoter	8	0.062	Biological Process	GO:0006367	transcription initiation from RNA polymerase II promoter
GO:0006368 transcription elongation from RNA polymerase II promoter	5	0.039	Biological Process	GO:0006368	transcription elongation from RNA polymerase II promoter
GO:0006370 7-methylguanosine mRNA capping	2	0.015	Biological Process	GO:0006370	7-methylguanosine mRNA capping
GO:0006376 mRNA splice site selection	2	0.015	Biological Process	GO:0006376	mRNA splice site selection
GO:0006378 mRNA polyadenylation	4	0.031	Biological Process	GO:0006378	mRNA polyadenylation
GO:0006379 mRNA cleavage	2	0.015	Biological Process	GO:0006379	mRNA cleavage
GO:0006383 transcription from RNA polymerase III promoter	6	0.046	Biological Process	GO:0006383	transcription from RNA polymerase III promoter
GO:0006384 transcription initiation from RNA polymerase III promoter	1	0.008	Biological Process	GO:0006384	transcription initiation from RNA polymerase III promoter
GO:0006388 tRNA splicing, via endonucleolytic cleavage and ligation	4	0.031	Biological Process	GO:0006388	tRNA splicing, via endonucleolytic cleavage and ligation
GO:0006396 RNA processing	223	1.724	Biological Process	GO:0006396	RNA processing
GO:0006397 mRNA processing	87	0.672	Biological Process	GO:0006397	mRNA processing
GO:0006399 tRNA metabolic process	107	0.827	Biological Process	GO:0006399	tRNA metabolic process
GO:0006400 tRNA modification	11	0.085	Biological Process	GO:0006400	tRNA modification
GO:0006401 RNA catabolic process	11	0.085	Biological Process	GO:0006401	RNA catabolic process
GO:0006402 mRNA catabolic process	9	0.07	Biological Process	GO:0006402	mRNA catabolic process
GO:0006403 RNA localization	2	0.015	Biological Process	GO:0006403	RNA localization
GO:0006405 RNA export from nucleus	1	0.008	Biological Process	GO:0006405	RNA export from nucleus
GO:0006406 mRNA export from nucleus	1	0.008	Biological Process	GO:0006406	mRNA export from nucleus
GO:0006412 translation	356	2.752	Biological Process	GO:0006412	translation
GO:0006413 translational initiation	24	0.186	Biological Process	GO:0006413	translational initiation
GO:0006414 translational elongation	16	0.124	Biological Process	GO:0006414	translational elongation
GO:0006415 translational termination	19	0.147	Biological Process	GO:0006415	translational termination
GO:0006417 regulation of translation	6	0.046	Biological Process	GO:0006417	regulation of translation
GO:0006418 tRNA aminoacylation for protein translation	58	0.448	Biological Process	GO:0006418	tRNA aminoacylation for protein translation
GO:0006419 alanyl-tRNA aminoacylation	3	0.023	Biological Process	GO:0006419	alanyl-tRNA aminoacylation
GO:0006420 arginyl-tRNA aminoacylation	1	0.008	Biological Process	GO:0006420	arginyl-tRNA aminoacylation
GO:0006421 asparaginyl-tRNA aminoacylation	1	0.008	Biological Process	GO:0006421	asparaginyl-tRNA aminoacylation
GO:0006422 aspartyl-tRNA aminoacylation	4	0.031	Biological Process	GO:0006422	aspartyl-tRNA aminoacylation
GO:0006425 glutaminyl-tRNA aminoacylation	1	0.008	Biological Process	GO:0006425	glutaminyl-tRNA aminoacylation
GO:0006426 glycyl-tRNA aminoacylation	2	0.015	Biological Process	GO:0006426	glycyl-tRNA aminoacylation
GO:0006429 leucyl-tRNA aminoacylation	1	0.008	Biological Process	GO:0006429	leucyl-tRNA aminoacylation
GO:0006432 phenylalanyl-tRNA aminoacylation	2	0.015	Biological Process	GO:0006432	phenylalanyl-tRNA aminoacylation
GO:0006433 prolyl-tRNA aminoacylation	3	0.023	Biological Process	GO:0006433	prolyl-tRNA aminoacylation
GO:0006434 seryl-tRNA aminoacylation	2	0.015	Biological Process	GO:0006434	seryl-tRNA aminoacylation
GO:0006436 tryptophanyl-tRNA aminoacylation	2	0.015	Biological Process	GO:0006436	tryptophanyl-tRNA aminoacylation
GO:0006438 valyl-tRNA aminoacylation	4	0.031	Biological Process	GO:0006438	valyl-tRNA aminoacylation
GO:0006448 regulation of translational elongation	6	0.046	Biological Process	GO:0006448	regulation of translational elongation
GO:0006449 regulation of translational termination	4	0.031	Biological Process	GO:0006449	regulation of translational termination
GO:0006450 regulation of translational fidelity	1	0.008	Biological Process	GO:0006450	regulation of translational fidelity
GO:0006452 translational frameshifting	4	0.031	Biological Process	GO:0006452	translational frameshifting
GO:0006457 protein folding	115	0.889	Biological Process	GO:0006457	protein folding
GO:0006461 protein complex assembly	81	0.626	Biological Process	GO:0006461	protein complex assembly
GO:0006464 cellular protein modification process	2319	17.925	Biological Process	GO:0006464	cellular protein modification process
GO:0006465 signal peptide processing	5	0.039	Biological Process	GO:0006465	signal peptide processing
GO:0006468 protein phosphorylation	1894	14.64	Biological Process	GO:0006468	protein phosphorylation
GO:0006470 protein dephosphorylation	90	0.696	Biological Process	GO:0006470	protein dephosphorylation
GO:0006471 protein ADP-ribosylation	3	0.023	Biological Process	GO:0006471	protein ADP-ribosylation
GO:0006473 protein acetylation	10	0.077	Biological Process	GO:0006473	protein acetylation
GO:0006475 internal protein amino acid acetylation	10	0.077	Biological Process	GO:0006475	internal protein amino acid acetylation
GO:0006476 protein deacetylation	3	0.023	Biological Process	GO:0006476	protein deacetylation
GO:0006479 protein methylation	24	0.186	Biological Process	GO:0006479	protein methylation
GO:0006480 N-terminal protein amino acid methylation	1	0.008	Biological Process	GO:0006480	N-terminal protein amino acid methylation
GO:0006481 C-terminal protein methylation	2	0.015	Biological Process	GO:0006481	C-terminal protein methylation
GO:0006482 protein demethylation	1	0.008	Biological Process	GO:0006482	protein demethylation
GO:0006486 protein glycosylation	49	0.379	Biological Process	GO:0006486	protein glycosylation
GO:0006487 protein N-linked glycosylation	13	0.1	Biological Process	GO:0006487	protein N-linked glycosylation
GO:0006488 dolichol-linked oligosaccharide biosynthetic process	1	0.008	Biological Process	GO:0006488	dolichol-linked oligosaccharide biosynthetic process
GO:0006490 oligosaccharide-lipid intermediate biosynthetic process	1	0.008	Biological Process	GO:0006490	oligosaccharide-lipid intermediate biosynthetic process
GO:0006491 N-glycan processing	4	0.031	Biological Process	GO:0006491	N-glycan processing
GO:0006497 protein lipidation	17	0.131	Biological Process	GO:0006497	protein lipidation
GO:0006498 N-terminal protein lipidation	3	0.023	Biological Process	GO:0006498	N-terminal protein lipidation
GO:0006499 N-terminal protein myristoylation	3	0.023	Biological Process	GO:0006499	N-terminal protein myristoylation
GO:0006505 GPI anchor metabolic process	16	0.124	Biological Process	GO:0006505	GPI anchor metabolic process
GO:0006506 GPI anchor biosynthetic process	14	0.108	Biological Process	GO:0006506	GPI anchor biosynthetic process
GO:0006508 proteolysis	662	5.117	Biological Process	GO:0006508	proteolysis
GO:0006511 ubiquitin-dependent protein catabolic process	114	0.881	Biological Process	GO:0006511	ubiquitin-dependent protein catabolic process
GO:0006518 peptide metabolic process	370	2.86	Biological Process	GO:0006518	peptide metabolic process
GO:0006520 cellular amino acid metabolic process	240	1.855	Biological Process	GO:0006520	cellular amino acid metabolic process
GO:0006525 arginine metabolic process	5	0.039	Biological Process	GO:0006525	arginine metabolic process
GO:0006526 arginine biosynthetic process	4	0.031	Biological Process	GO:0006526	arginine biosynthetic process
GO:0006527 arginine catabolic process	1	0.008	Biological Process	GO:0006527	arginine catabolic process
GO:0006528 asparagine metabolic process	3	0.023	Biological Process	GO:0006528	asparagine metabolic process
GO:0006529 asparagine biosynthetic process	3	0.023	Biological Process	GO:0006529	asparagine biosynthetic process
GO:0006534 cysteine metabolic process	15	0.116	Biological Process	GO:0006534	cysteine metabolic process
GO:0006535 cysteine biosynthetic process from serine	15	0.116	Biological Process	GO:0006535	cysteine biosynthetic process from serine
GO:0006536 glutamate metabolic process	2	0.015	Biological Process	GO:0006536	glutamate metabolic process
GO:0006537 glutamate biosynthetic process	2	0.015	Biological Process	GO:0006537	glutamate biosynthetic process
GO:0006541 glutamine metabolic process	14	0.108	Biological Process	GO:0006541	glutamine metabolic process
GO:0006542 glutamine biosynthetic process	5	0.039	Biological Process	GO:0006542	glutamine biosynthetic process
GO:0006544 glycine metabolic process	12	0.093	Biological Process	GO:0006544	glycine metabolic process
GO:0006545 glycine biosynthetic process	2	0.015	Biological Process	GO:0006545	glycine biosynthetic process
GO:0006546 glycine catabolic process	4	0.031	Biological Process	GO:0006546	glycine catabolic process
GO:0006547 histidine metabolic process	7	0.054	Biological Process	GO:0006547	histidine metabolic process
GO:0006549 isoleucine metabolic process	1	0.008	Biological Process	GO:0006549	isoleucine metabolic process
GO:0006551 leucine metabolic process	5	0.039	Biological Process	GO:0006551	leucine metabolic process
GO:0006553 lysine metabolic process	8	0.062	Biological Process	GO:0006553	lysine metabolic process
GO:0006555 methionine metabolic process	17	0.131	Biological Process	GO:0006555	methionine metabolic process
GO:0006556 S-adenosylmethionine biosynthetic process	4	0.031	Biological Process	GO:0006556	S-adenosylmethionine biosynthetic process
GO:0006558 L-phenylalanine metabolic process	7	0.054	Biological Process	GO:0006558	L-phenylalanine metabolic process
GO:0006559 L-phenylalanine catabolic process	2	0.015	Biological Process	GO:0006559	L-phenylalanine catabolic process
GO:0006560 proline metabolic process	3	0.023	Biological Process	GO:0006560	proline metabolic process
GO:0006561 proline biosynthetic process	2	0.015	Biological Process	GO:0006561	proline biosynthetic process
GO:0006562 proline catabolic process	1	0.008	Biological Process	GO:0006562	proline catabolic process
GO:0006563 L-serine metabolic process	22	0.17	Biological Process	GO:0006563	L-serine metabolic process
GO:0006564 L-serine biosynthetic process	1	0.008	Biological Process	GO:0006564	L-serine biosynthetic process
GO:0006566 threonine metabolic process	1	0.008	Biological Process	GO:0006566	threonine metabolic process
GO:0006568 tryptophan metabolic process	13	0.1	Biological Process	GO:0006568	tryptophan metabolic process
GO:0006569 tryptophan catabolic process	3	0.023	Biological Process	GO:0006569	tryptophan catabolic process
GO:0006570 tyrosine metabolic process	4	0.031	Biological Process	GO:0006570	tyrosine metabolic process
GO:0006571 tyrosine biosynthetic process	2	0.015	Biological Process	GO:0006571	tyrosine biosynthetic process
GO:0006575 cellular modified amino acid metabolic process	35	0.271	Biological Process	GO:0006575	cellular modified amino acid metabolic process
GO:0006576 cellular biogenic amine metabolic process	34	0.263	Biological Process	GO:0006576	cellular biogenic amine metabolic process
GO:0006586 indolalkylamine metabolic process	13	0.1	Biological Process	GO:0006586	indolalkylamine metabolic process
GO:0006591 ornithine metabolic process	1	0.008	Biological Process	GO:0006591	ornithine metabolic process
GO:0006595 polyamine metabolic process	9	0.07	Biological Process	GO:0006595	polyamine metabolic process
GO:0006596 polyamine biosynthetic process	7	0.054	Biological Process	GO:0006596	polyamine biosynthetic process
GO:0006597 spermine biosynthetic process	5	0.039	Biological Process	GO:0006597	spermine biosynthetic process
GO:0006605 protein targeting	41	0.317	Biological Process	GO:0006605	protein targeting
GO:0006606 protein import into nucleus	10	0.077	Biological Process	GO:0006606	protein import into nucleus
GO:0006612 protein targeting to membrane	14	0.108	Biological Process	GO:0006612	protein targeting to membrane
GO:0006613 cotranslational protein targeting to membrane	13	0.1	Biological Process	GO:0006613	cotranslational protein targeting to membrane
GO:0006614 SRP-dependent cotranslational protein targeting to membrane	13	0.1	Biological Process	GO:0006614	SRP-dependent cotranslational protein targeting to membrane
GO:0006621 protein retention in ER lumen	5	0.039	Biological Process	GO:0006621	protein retention in ER lumen
GO:0006625 protein targeting to peroxisome	5	0.039	Biological Process	GO:0006625	protein targeting to peroxisome
GO:0006626 protein targeting to mitochondrion	8	0.062	Biological Process	GO:0006626	protein targeting to mitochondrion
GO:0006629 lipid metabolic process	463	3.579	Biological Process	GO:0006629	lipid metabolic process
GO:0006631 fatty acid metabolic process	99	0.765	Biological Process	GO:0006631	fatty acid metabolic process
GO:0006633 fatty acid biosynthetic process	85	0.657	Biological Process	GO:0006633	fatty acid biosynthetic process
GO:0006635 fatty acid beta-oxidation	4	0.031	Biological Process	GO:0006635	fatty acid beta-oxidation
GO:0006636 unsaturated fatty acid biosynthetic process	2	0.015	Biological Process	GO:0006636	unsaturated fatty acid biosynthetic process
GO:0006637 acyl-CoA metabolic process	3	0.023	Biological Process	GO:0006637	acyl-CoA metabolic process
GO:0006638 neutral lipid metabolic process	1	0.008	Biological Process	GO:0006638	neutral lipid metabolic process
GO:0006639 acylglycerol metabolic process	1	0.008	Biological Process	GO:0006639	acylglycerol metabolic process
GO:0006641 triglyceride metabolic process	1	0.008	Biological Process	GO:0006641	triglyceride metabolic process
GO:0006643 membrane lipid metabolic process	30	0.232	Biological Process	GO:0006643	membrane lipid metabolic process
GO:0006644 phospholipid metabolic process	100	0.773	Biological Process	GO:0006644	phospholipid metabolic process
GO:0006650 glycerophospholipid metabolic process	75	0.58	Biological Process	GO:0006650	glycerophospholipid metabolic process
GO:0006654 phosphatidic acid biosynthetic process	1	0.008	Biological Process	GO:0006654	phosphatidic acid biosynthetic process
GO:0006656 phosphatidylcholine biosynthetic process	1	0.008	Biological Process	GO:0006656	phosphatidylcholine biosynthetic process
GO:0006658 phosphatidylserine metabolic process	1	0.008	Biological Process	GO:0006658	phosphatidylserine metabolic process
GO:0006659 phosphatidylserine biosynthetic process	1	0.008	Biological Process	GO:0006659	phosphatidylserine biosynthetic process
GO:0006661 phosphatidylinositol biosynthetic process	16	0.124	Biological Process	GO:0006661	phosphatidylinositol biosynthetic process
GO:0006662 glycerol ether metabolic process	35	0.271	Biological Process	GO:0006662	glycerol ether metabolic process
GO:0006664 glycolipid metabolic process	26	0.201	Biological Process	GO:0006664	glycolipid metabolic process
GO:0006665 sphingolipid metabolic process	8	0.062	Biological Process	GO:0006665	sphingolipid metabolic process
GO:0006672 ceramide metabolic process	7	0.054	Biological Process	GO:0006672	ceramide metabolic process
GO:0006677 glycosylceramide metabolic process	4	0.031	Biological Process	GO:0006677	glycosylceramide metabolic process
GO:0006678 glucosylceramide metabolic process	4	0.031	Biological Process	GO:0006678	glucosylceramide metabolic process
GO:0006680 glucosylceramide catabolic process	4	0.031	Biological Process	GO:0006680	glucosylceramide catabolic process
GO:0006687 glycosphingolipid metabolic process	4	0.031	Biological Process	GO:0006687	glycosphingolipid metabolic process
GO:0006690 icosanoid metabolic process	2	0.015	Biological Process	GO:0006690	icosanoid metabolic process
GO:0006691 leukotriene metabolic process	2	0.015	Biological Process	GO:0006691	leukotriene metabolic process
GO:0006694 steroid biosynthetic process	12	0.093	Biological Process	GO:0006694	steroid biosynthetic process
GO:0006714 sesquiterpenoid metabolic process	4	0.031	Biological Process	GO:0006714	sesquiterpenoid metabolic process
GO:0006720 isoprenoid metabolic process	35	0.271	Biological Process	GO:0006720	isoprenoid metabolic process
GO:0006721 terpenoid metabolic process	13	0.1	Biological Process	GO:0006721	terpenoid metabolic process
GO:0006725 cellular aromatic compound metabolic process	2033	15.715	Biological Process	GO:0006725	cellular aromatic compound metabolic process
GO:0006729 tetrahydrobiopterin biosynthetic process	3	0.023	Biological Process	GO:0006729	tetrahydrobiopterin biosynthetic process
GO:0006730 one-carbon metabolic process	22	0.17	Biological Process	GO:0006730	one-carbon metabolic process
GO:0006732 coenzyme metabolic process	136	1.051	Biological Process	GO:0006732	coenzyme metabolic process
GO:0006733 oxidoreduction coenzyme metabolic process	79	0.611	Biological Process	GO:0006733	oxidoreduction coenzyme metabolic process
GO:0006739 NADP metabolic process	16	0.124	Biological Process	GO:0006739	NADP metabolic process
GO:0006741 NADP biosynthetic process	6	0.046	Biological Process	GO:0006741	NADP biosynthetic process
GO:0006743 ubiquinone metabolic process	1	0.008	Biological Process	GO:0006743	ubiquinone metabolic process
GO:0006744 ubiquinone biosynthetic process	1	0.008	Biological Process	GO:0006744	ubiquinone biosynthetic process
GO:0006749 glutathione metabolic process	4	0.031	Biological Process	GO:0006749	glutathione metabolic process
GO:0006750 glutathione biosynthetic process	2	0.015	Biological Process	GO:0006750	glutathione biosynthetic process
GO:0006753 nucleoside phosphate metabolic process	171	1.322	Biological Process	GO:0006753	nucleoside phosphate metabolic process
GO:0006754 ATP biosynthetic process	21	0.162	Biological Process	GO:0006754	ATP biosynthetic process
GO:0006757 ATP generation from ADP	58	0.448	Biological Process	GO:0006757	ATP generation from ADP
GO:0006760 folic acid-containing compound metabolic process	17	0.131	Biological Process	GO:0006760	folic acid-containing compound metabolic process
GO:0006766 vitamin metabolic process	23	0.178	Biological Process	GO:0006766	vitamin metabolic process
GO:0006767 water-soluble vitamin metabolic process	22	0.17	Biological Process	GO:0006767	water-soluble vitamin metabolic process
GO:0006771 riboflavin metabolic process	11	0.085	Biological Process	GO:0006771	riboflavin metabolic process
GO:0006772 thiamine metabolic process	3	0.023	Biological Process	GO:0006772	thiamine metabolic process
GO:0006775 fat-soluble vitamin metabolic process	1	0.008	Biological Process	GO:0006775	fat-soluble vitamin metabolic process
GO:0006777 Mo-molybdopterin cofactor biosynthetic process	4	0.031	Biological Process	GO:0006777	Mo-molybdopterin cofactor biosynthetic process
GO:0006778 porphyrin-containing compound metabolic process	14	0.108	Biological Process	GO:0006778	porphyrin-containing compound metabolic process
GO:0006779 porphyrin-containing compound biosynthetic process	8	0.062	Biological Process	GO:0006779	porphyrin-containing compound biosynthetic process
GO:0006783 heme biosynthetic process	3	0.023	Biological Process	GO:0006783	heme biosynthetic process
GO:0006784 heme a biosynthetic process	1	0.008	Biological Process	GO:0006784	heme a biosynthetic process
GO:0006787 porphyrin-containing compound catabolic process	6	0.046	Biological Process	GO:0006787	porphyrin-containing compound catabolic process
GO:0006788 heme oxidation	3	0.023	Biological Process	GO:0006788	heme oxidation
GO:0006790 sulfur compound metabolic process	61	0.472	Biological Process	GO:0006790	sulfur compound metabolic process
GO:0006793 phosphorus metabolic process	2303	17.802	Biological Process	GO:0006793	phosphorus metabolic process
GO:0006796 phosphate-containing compound metabolic process	2300	17.778	Biological Process	GO:0006796	phosphate-containing compound metabolic process
GO:0006801 superoxide metabolic process	13	0.1	Biological Process	GO:0006801	superoxide metabolic process
GO:0006807 nitrogen compound metabolic process	2588	20.005	Biological Process	GO:0006807	nitrogen compound metabolic process
GO:0006808 regulation of nitrogen utilization	2	0.015	Biological Process	GO:0006808	regulation of nitrogen utilization
GO:0006809 nitric oxide biosynthetic process	1	0.008	Biological Process	GO:0006809	nitric oxide biosynthetic process
GO:0006810 transport	1617	12.499	Biological Process	GO:0006810	transport
GO:0006811 ion transport	492	3.803	Biological Process	GO:0006811	ion transport
GO:0006812 cation transport	327	2.528	Biological Process	GO:0006812	cation transport
GO:0006813 potassium ion transport	32	0.247	Biological Process	GO:0006813	potassium ion transport
GO:0006814 sodium ion transport	8	0.062	Biological Process	GO:0006814	sodium ion transport
GO:0006817 phosphate ion transport	3	0.023	Biological Process	GO:0006817	phosphate ion transport
GO:0006818 hydrogen transport	70	0.541	Biological Process	GO:0006818	hydrogen transport
GO:0006820 anion transport	122	0.943	Biological Process	GO:0006820	anion transport
GO:0006821 chloride transport	9	0.07	Biological Process	GO:0006821	chloride transport
GO:0006825 copper ion transport	9	0.07	Biological Process	GO:0006825	copper ion transport
GO:0006826 iron ion transport	10	0.077	Biological Process	GO:0006826	iron ion transport
GO:0006835 dicarboxylic acid transport	22	0.17	Biological Process	GO:0006835	dicarboxylic acid transport
GO:0006839 mitochondrial transport	13	0.1	Biological Process	GO:0006839	mitochondrial transport
GO:0006848 pyruvate transport	5	0.039	Biological Process	GO:0006848	pyruvate transport
GO:0006850 mitochondrial pyruvate transport	5	0.039	Biological Process	GO:0006850	mitochondrial pyruvate transport
GO:0006855 drug transmembrane transport	85	0.657	Biological Process	GO:0006855	drug transmembrane transport
GO:0006857 oligopeptide transport	19	0.147	Biological Process	GO:0006857	oligopeptide transport
GO:0006862 nucleotide transport	8	0.062	Biological Process	GO:0006862	nucleotide transport
GO:0006863 purine nucleobase transport	2	0.015	Biological Process	GO:0006863	purine nucleobase transport
GO:0006865 amino acid transport	30	0.232	Biological Process	GO:0006865	amino acid transport
GO:0006869 lipid transport	26	0.201	Biological Process	GO:0006869	lipid transport
GO:0006873 cellular ion homeostasis	6	0.046	Biological Process	GO:0006873	cellular ion homeostasis
GO:0006875 cellular metal ion homeostasis	5	0.039	Biological Process	GO:0006875	cellular metal ion homeostasis
GO:0006879 cellular iron ion homeostasis	4	0.031	Biological Process	GO:0006879	cellular iron ion homeostasis
GO:0006886 intracellular protein transport	209	1.616	Biological Process	GO:0006886	intracellular protein transport
GO:0006887 exocytosis	33	0.255	Biological Process	GO:0006887	exocytosis
GO:0006888 ER to Golgi vesicle-mediated transport	16	0.124	Biological Process	GO:0006888	ER to Golgi vesicle-mediated transport
GO:0006890 retrograde vesicle-mediated transport, Golgi to ER	6	0.046	Biological Process	GO:0006890	retrograde vesicle-mediated transport, Golgi to ER
GO:0006891 intra-Golgi vesicle-mediated transport	4	0.031	Biological Process	GO:0006891	intra-Golgi vesicle-mediated transport
GO:0006892 post-Golgi vesicle-mediated transport	2	0.015	Biological Process	GO:0006892	post-Golgi vesicle-mediated transport
GO:0006893 Golgi to plasma membrane transport	2	0.015	Biological Process	GO:0006893	Golgi to plasma membrane transport
GO:0006897 endocytosis	3	0.023	Biological Process	GO:0006897	endocytosis
GO:0006900 membrane budding	1	0.008	Biological Process	GO:0006900	membrane budding
GO:0006901 vesicle coating	1	0.008	Biological Process	GO:0006901	vesicle coating
GO:0006903 vesicle targeting	1	0.008	Biological Process	GO:0006903	vesicle targeting
GO:0006904 vesicle docking involved in exocytosis	10	0.077	Biological Process	GO:0006904	vesicle docking involved in exocytosis
GO:0006906 vesicle fusion	1	0.008	Biological Process	GO:0006906	vesicle fusion
GO:0006909 phagocytosis	1	0.008	Biological Process	GO:0006909	phagocytosis
GO:0006913 nucleocytoplasmic transport	68	0.526	Biological Process	GO:0006913	nucleocytoplasmic transport
GO:0006914 autophagy	9	0.07	Biological Process	GO:0006914	autophagy
GO:0006928 movement of cell or subcellular component	72	0.557	Biological Process	GO:0006928	movement of cell or subcellular component
GO:0006950 response to stress	719	5.558	Biological Process	GO:0006950	response to stress
GO:0006952 defense response	210	1.623	Biological Process	GO:0006952	defense response
GO:0006955 immune response	9	0.07	Biological Process	GO:0006955	immune response
GO:0006970 response to osmotic stress	5	0.039	Biological Process	GO:0006970	response to osmotic stress
GO:0006974 cellular response to DNA damage stimulus	167	1.291	Biological Process	GO:0006974	cellular response to DNA damage stimulus
GO:0006979 response to oxidative stress	162	1.252	Biological Process	GO:0006979	response to oxidative stress
GO:0006996 organelle organization	277	2.141	Biological Process	GO:0006996	organelle organization
GO:0007005 mitochondrion organization	23	0.178	Biological Process	GO:0007005	mitochondrion organization
GO:0007006 mitochondrial membrane organization	3	0.023	Biological Process	GO:0007006	mitochondrial membrane organization
GO:0007007 inner mitochondrial membrane organization	1	0.008	Biological Process	GO:0007007	inner mitochondrial membrane organization
GO:0007008 outer mitochondrial membrane organization	2	0.015	Biological Process	GO:0007008	outer mitochondrial membrane organization
GO:0007010 cytoskeleton organization	74	0.572	Biological Process	GO:0007010	cytoskeleton organization
GO:0007015 actin filament organization	40	0.309	Biological Process	GO:0007015	actin filament organization
GO:0007017 microtubule-based process	121	0.935	Biological Process	GO:0007017	microtubule-based process
GO:0007018 microtubule-based movement	71	0.549	Biological Process	GO:0007018	microtubule-based movement
GO:0007020 microtubule nucleation	8	0.062	Biological Process	GO:0007020	microtubule nucleation
GO:0007021 tubulin complex assembly	1	0.008	Biological Process	GO:0007021	tubulin complex assembly
GO:0007023 post-chaperonin tubulin folding pathway	1	0.008	Biological Process	GO:0007023	post-chaperonin tubulin folding pathway
GO:0007029 endoplasmic reticulum organization	2	0.015	Biological Process	GO:0007029	endoplasmic reticulum organization
GO:0007030 Golgi organization	1	0.008	Biological Process	GO:0007030	Golgi organization
GO:0007031 peroxisome organization	8	0.062	Biological Process	GO:0007031	peroxisome organization
GO:0007033 vacuole organization	3	0.023	Biological Process	GO:0007033	vacuole organization
GO:0007034 vacuolar transport	20	0.155	Biological Process	GO:0007034	vacuolar transport
GO:0007049 cell cycle	126	0.974	Biological Process	GO:0007049	cell cycle
GO:0007050 cell cycle arrest	7	0.054	Biological Process	GO:0007050	cell cycle arrest
GO:0007051 spindle organization	11	0.085	Biological Process	GO:0007051	spindle organization
GO:0007052 mitotic spindle organization	6	0.046	Biological Process	GO:0007052	mitotic spindle organization
GO:0007059 chromosome segregation	48	0.371	Biological Process	GO:0007059	chromosome segregation
GO:0007062 sister chromatid cohesion	1	0.008	Biological Process	GO:0007062	sister chromatid cohesion
GO:0007064 mitotic sister chromatid cohesion	1	0.008	Biological Process	GO:0007064	mitotic sister chromatid cohesion
GO:0007067 mitotic nuclear division	48	0.371	Biological Process	GO:0007067	mitotic nuclear division
GO:0007076 mitotic chromosome condensation	17	0.131	Biological Process	GO:0007076	mitotic chromosome condensation
GO:0007088 regulation of mitotic nuclear division	26	0.201	Biological Process	GO:0007088	regulation of mitotic nuclear division
GO:0007091 metaphase/anaphase transition of mitotic cell cycle	26	0.201	Biological Process	GO:0007091	metaphase/anaphase transition of mitotic cell cycle
GO:0007093 mitotic cell cycle checkpoint	8	0.062	Biological Process	GO:0007093	mitotic cell cycle checkpoint
GO:0007094 mitotic spindle assembly checkpoint	6	0.046	Biological Process	GO:0007094	mitotic spindle assembly checkpoint
GO:0007126 meiotic nuclear division	2	0.015	Biological Process	GO:0007126	meiotic nuclear division
GO:0007127 meiosis I	1	0.008	Biological Process	GO:0007127	meiosis I
GO:0007131 reciprocal meiotic recombination	1	0.008	Biological Process	GO:0007131	reciprocal meiotic recombination
GO:0007154 cell communication	1320	10.203	Biological Process	GO:0007154	cell communication
GO:0007155 cell adhesion	1	0.008	Biological Process	GO:0007155	cell adhesion
GO:0007165 signal transduction	1127	8.711	Biological Process	GO:0007165	signal transduction
GO:0007166 cell surface receptor signaling pathway	1	0.008	Biological Process	GO:0007166	cell surface receptor signaling pathway
GO:0007186 G-protein coupled receptor signaling pathway	22	0.17	Biological Process	GO:0007186	G-protein coupled receptor signaling pathway
GO:0007205 protein kinase C-activating G-protein coupled receptor signaling pathway	8	0.062	Biological Process	GO:0007205	protein kinase C-activating G-protein coupled receptor signaling pathway
GO:0007219 Notch signaling pathway	1	0.008	Biological Process	GO:0007219	Notch signaling pathway
GO:0007264 small GTPase mediated signal transduction	101	0.781	Biological Process	GO:0007264	small GTPase mediated signal transduction
GO:0007265 Ras protein signal transduction	5	0.039	Biological Process	GO:0007265	Ras protein signal transduction
GO:0007275 multicellular organism development	51	0.394	Biological Process	GO:0007275	multicellular organism development
GO:0007276 gamete generation	1	0.008	Biological Process	GO:0007276	gamete generation
GO:0007283 spermatogenesis	1	0.008	Biological Process	GO:0007283	spermatogenesis
GO:0007346 regulation of mitotic cell cycle	35	0.271	Biological Process	GO:0007346	regulation of mitotic cell cycle
GO:0007389 pattern specification process	1	0.008	Biological Process	GO:0007389	pattern specification process
GO:0007602 phototransduction	4	0.031	Biological Process	GO:0007602	phototransduction
GO:0007623 circadian rhythm	1	0.008	Biological Process	GO:0007623	circadian rhythm
GO:0008033 tRNA processing	50	0.386	Biological Process	GO:0008033	tRNA processing
GO:0008037 cell recognition	178	1.376	Biological Process	GO:0008037	cell recognition
GO:0008064 regulation of actin polymerization or depolymerization	13	0.1	Biological Process	GO:0008064	regulation of actin polymerization or depolymerization
GO:0008104 protein localization	278	2.149	Biological Process	GO:0008104	protein localization
GO:0008150 biological_process	12937	100	Biological Process	GO:0008150	biological_process
GO:0008152 metabolic process	9446	73.015	Biological Process	GO:0008152	metabolic process
GO:0008154 actin polymerization or depolymerization	22	0.17	Biological Process	GO:0008154	actin polymerization or depolymerization
GO:0008156 negative regulation of DNA replication	1	0.008	Biological Process	GO:0008156	negative regulation of DNA replication
GO:0008202 steroid metabolic process	14	0.108	Biological Process	GO:0008202	steroid metabolic process
GO:0008213 protein alkylation	24	0.186	Biological Process	GO:0008213	protein alkylation
GO:0008214 protein dealkylation	1	0.008	Biological Process	GO:0008214	protein dealkylation
GO:0008215 spermine metabolic process	5	0.039	Biological Process	GO:0008215	spermine metabolic process
GO:0008216 spermidine metabolic process	6	0.046	Biological Process	GO:0008216	spermidine metabolic process
GO:0008219 cell death	6	0.046	Biological Process	GO:0008219	cell death
GO:0008272 sulfate transport	18	0.139	Biological Process	GO:0008272	sulfate transport
GO:0008283 cell proliferation	8	0.062	Biological Process	GO:0008283	cell proliferation
GO:0008295 spermidine biosynthetic process	6	0.046	Biological Process	GO:0008295	spermidine biosynthetic process
GO:0008299 isoprenoid biosynthetic process	35	0.271	Biological Process	GO:0008299	isoprenoid biosynthetic process
GO:0008356 asymmetric cell division	1	0.008	Biological Process	GO:0008356	asymmetric cell division
GO:0008380 RNA splicing	50	0.386	Biological Process	GO:0008380	RNA splicing
GO:0008593 regulation of Notch signaling pathway	1	0.008	Biological Process	GO:0008593	regulation of Notch signaling pathway
GO:0008610 lipid biosynthetic process	182	1.407	Biological Process	GO:0008610	lipid biosynthetic process
GO:0008612 peptidyl-lysine modification to peptidyl-hypusine	1	0.008	Biological Process	GO:0008612	peptidyl-lysine modification to peptidyl-hypusine
GO:0008616 queuosine biosynthetic process	2	0.015	Biological Process	GO:0008616	queuosine biosynthetic process
GO:0008643 carbohydrate transport	6	0.046	Biological Process	GO:0008643	carbohydrate transport
GO:0008652 cellular amino acid biosynthetic process	112	0.866	Biological Process	GO:0008652	cellular amino acid biosynthetic process
GO:0008654 phospholipid biosynthetic process	35	0.271	Biological Process	GO:0008654	phospholipid biosynthetic process
GO:0008655 pyrimidine-containing compound salvage	4	0.031	Biological Process	GO:0008655	pyrimidine-containing compound salvage
GO:0009052 pentose-phosphate shunt, non-oxidative branch	6	0.046	Biological Process	GO:0009052	pentose-phosphate shunt, non-oxidative branch
GO:0009056 catabolic process	315	2.435	Biological Process	GO:0009056	catabolic process
GO:0009057 macromolecule catabolic process	199	1.538	Biological Process	GO:0009057	macromolecule catabolic process
GO:0009058 biosynthetic process	2295	17.74	Biological Process	GO:0009058	biosynthetic process
GO:0009059 macromolecule biosynthetic process	1688	13.048	Biological Process	GO:0009059	macromolecule biosynthetic process
GO:0009060 aerobic respiration	9	0.07	Biological Process	GO:0009060	aerobic respiration
GO:0009062 fatty acid catabolic process	4	0.031	Biological Process	GO:0009062	fatty acid catabolic process
GO:0009063 cellular amino acid catabolic process	16	0.124	Biological Process	GO:0009063	cellular amino acid catabolic process
GO:0009064 glutamine family amino acid metabolic process	24	0.186	Biological Process	GO:0009064	glutamine family amino acid metabolic process
GO:0009065 glutamine family amino acid catabolic process	2	0.015	Biological Process	GO:0009065	glutamine family amino acid catabolic process
GO:0009066 aspartate family amino acid metabolic process	27	0.209	Biological Process	GO:0009066	aspartate family amino acid metabolic process
GO:0009067 aspartate family amino acid biosynthetic process	25	0.193	Biological Process	GO:0009067	aspartate family amino acid biosynthetic process
GO:0009069 serine family amino acid metabolic process	28	0.216	Biological Process	GO:0009069	serine family amino acid metabolic process
GO:0009070 serine family amino acid biosynthetic process	18	0.139	Biological Process	GO:0009070	serine family amino acid biosynthetic process
GO:0009071 serine family amino acid catabolic process	4	0.031	Biological Process	GO:0009071	serine family amino acid catabolic process
GO:0009072 aromatic amino acid family metabolic process	35	0.271	Biological Process	GO:0009072	aromatic amino acid family metabolic process
GO:0009073 aromatic amino acid family biosynthetic process	21	0.162	Biological Process	GO:0009073	aromatic amino acid family biosynthetic process
GO:0009074 aromatic amino acid family catabolic process	5	0.039	Biological Process	GO:0009074	aromatic amino acid family catabolic process
GO:0009081 branched-chain amino acid metabolic process	11	0.085	Biological Process	GO:0009081	branched-chain amino acid metabolic process
GO:0009082 branched-chain amino acid biosynthetic process	7	0.054	Biological Process	GO:0009082	branched-chain amino acid biosynthetic process
GO:0009084 glutamine family amino acid biosynthetic process	13	0.1	Biological Process	GO:0009084	glutamine family amino acid biosynthetic process
GO:0009085 lysine biosynthetic process	8	0.062	Biological Process	GO:0009085	lysine biosynthetic process
GO:0009086 methionine biosynthetic process	15	0.116	Biological Process	GO:0009086	methionine biosynthetic process
GO:0009088 threonine biosynthetic process	1	0.008	Biological Process	GO:0009088	threonine biosynthetic process
GO:0009089 lysine biosynthetic process via diaminopimelate	8	0.062	Biological Process	GO:0009089	lysine biosynthetic process via diaminopimelate
GO:0009094 L-phenylalanine biosynthetic process	5	0.039	Biological Process	GO:0009094	L-phenylalanine biosynthetic process
GO:0009095 aromatic amino acid family biosynthetic process, prephenate pathway	7	0.054	Biological Process	GO:0009095	aromatic amino acid family biosynthetic process, prephenate pathway
GO:0009097 isoleucine biosynthetic process	1	0.008	Biological Process	GO:0009097	isoleucine biosynthetic process
GO:0009098 leucine biosynthetic process	5	0.039	Biological Process	GO:0009098	leucine biosynthetic process
GO:0009100 glycoprotein metabolic process	53	0.41	Biological Process	GO:0009100	glycoprotein metabolic process
GO:0009101 glycoprotein biosynthetic process	53	0.41	Biological Process	GO:0009101	glycoprotein biosynthetic process
GO:0009106 lipoate metabolic process	5	0.039	Biological Process	GO:0009106	lipoate metabolic process
GO:0009107 lipoate biosynthetic process	5	0.039	Biological Process	GO:0009107	lipoate biosynthetic process
GO:0009108 coenzyme biosynthetic process	59	0.456	Biological Process	GO:0009108	coenzyme biosynthetic process
GO:0009110 vitamin biosynthetic process	23	0.178	Biological Process	GO:0009110	vitamin biosynthetic process
GO:0009112 nucleobase metabolic process	5	0.039	Biological Process	GO:0009112	nucleobase metabolic process
GO:0009113 purine nucleobase biosynthetic process	1	0.008	Biological Process	GO:0009113	purine nucleobase biosynthetic process
GO:0009116 nucleoside metabolic process	144	1.113	Biological Process	GO:0009116	nucleoside metabolic process
GO:0009117 nucleotide metabolic process	169	1.306	Biological Process	GO:0009117	nucleotide metabolic process
GO:0009119 ribonucleoside metabolic process	124	0.958	Biological Process	GO:0009119	ribonucleoside metabolic process
GO:0009123 nucleoside monophosphate metabolic process	105	0.812	Biological Process	GO:0009123	nucleoside monophosphate metabolic process
GO:0009124 nucleoside monophosphate biosynthetic process	35	0.271	Biological Process	GO:0009124	nucleoside monophosphate biosynthetic process
GO:0009126 purine nucleoside monophosphate metabolic process	96	0.742	Biological Process	GO:0009126	purine nucleoside monophosphate metabolic process
GO:0009127 purine nucleoside monophosphate biosynthetic process	26	0.201	Biological Process	GO:0009127	purine nucleoside monophosphate biosynthetic process
GO:0009129 pyrimidine nucleoside monophosphate metabolic process	8	0.062	Biological Process	GO:0009129	pyrimidine nucleoside monophosphate metabolic process
GO:0009130 pyrimidine nucleoside monophosphate biosynthetic process	8	0.062	Biological Process	GO:0009130	pyrimidine nucleoside monophosphate biosynthetic process
GO:0009132 nucleoside diphosphate metabolic process	66	0.51	Biological Process	GO:0009132	nucleoside diphosphate metabolic process
GO:0009133 nucleoside diphosphate biosynthetic process	1	0.008	Biological Process	GO:0009133	nucleoside diphosphate biosynthetic process
GO:0009135 purine nucleoside diphosphate metabolic process	58	0.448	Biological Process	GO:0009135	purine nucleoside diphosphate metabolic process
GO:0009138 pyrimidine nucleoside diphosphate metabolic process	1	0.008	Biological Process	GO:0009138	pyrimidine nucleoside diphosphate metabolic process
GO:0009139 pyrimidine nucleoside diphosphate biosynthetic process	1	0.008	Biological Process	GO:0009139	pyrimidine nucleoside diphosphate biosynthetic process
GO:0009141 nucleoside triphosphate metabolic process	98	0.758	Biological Process	GO:0009141	nucleoside triphosphate metabolic process
GO:0009142 nucleoside triphosphate biosynthetic process	26	0.201	Biological Process	GO:0009142	nucleoside triphosphate biosynthetic process
GO:0009144 purine nucleoside triphosphate metabolic process	96	0.742	Biological Process	GO:0009144	purine nucleoside triphosphate metabolic process
GO:0009145 purine nucleoside triphosphate biosynthetic process	26	0.201	Biological Process	GO:0009145	purine nucleoside triphosphate biosynthetic process
GO:0009147 pyrimidine nucleoside triphosphate metabolic process	7	0.054	Biological Process	GO:0009147	pyrimidine nucleoside triphosphate metabolic process
GO:0009148 pyrimidine nucleoside triphosphate biosynthetic process	5	0.039	Biological Process	GO:0009148	pyrimidine nucleoside triphosphate biosynthetic process
GO:0009150 purine ribonucleotide metabolic process	117	0.904	Biological Process	GO:0009150	purine ribonucleotide metabolic process
GO:0009152 purine ribonucleotide biosynthetic process	35	0.271	Biological Process	GO:0009152	purine ribonucleotide biosynthetic process
GO:0009156 ribonucleoside monophosphate biosynthetic process	31	0.24	Biological Process	GO:0009156	ribonucleoside monophosphate biosynthetic process
GO:0009157 deoxyribonucleoside monophosphate biosynthetic process	4	0.031	Biological Process	GO:0009157	deoxyribonucleoside monophosphate biosynthetic process
GO:0009161 ribonucleoside monophosphate metabolic process	101	0.781	Biological Process	GO:0009161	ribonucleoside monophosphate metabolic process
GO:0009162 deoxyribonucleoside monophosphate metabolic process	4	0.031	Biological Process	GO:0009162	deoxyribonucleoside monophosphate metabolic process
GO:0009163 nucleoside biosynthetic process	42	0.325	Biological Process	GO:0009163	nucleoside biosynthetic process
GO:0009165 nucleotide biosynthetic process	74	0.572	Biological Process	GO:0009165	nucleotide biosynthetic process
GO:0009166 nucleotide catabolic process	1	0.008	Biological Process	GO:0009166	nucleotide catabolic process
GO:0009167 purine ribonucleoside monophosphate metabolic process	96	0.742	Biological Process	GO:0009167	purine ribonucleoside monophosphate metabolic process
GO:0009168 purine ribonucleoside monophosphate biosynthetic process	26	0.201	Biological Process	GO:0009168	purine ribonucleoside monophosphate biosynthetic process
GO:0009173 pyrimidine ribonucleoside monophosphate metabolic process	4	0.031	Biological Process	GO:0009173	pyrimidine ribonucleoside monophosphate metabolic process
GO:0009174 pyrimidine ribonucleoside monophosphate biosynthetic process	4	0.031	Biological Process	GO:0009174	pyrimidine ribonucleoside monophosphate biosynthetic process
GO:0009176 pyrimidine deoxyribonucleoside monophosphate metabolic process	4	0.031	Biological Process	GO:0009176	pyrimidine deoxyribonucleoside monophosphate metabolic process
GO:0009177 pyrimidine deoxyribonucleoside monophosphate biosynthetic process	4	0.031	Biological Process	GO:0009177	pyrimidine deoxyribonucleoside monophosphate biosynthetic process
GO:0009179 purine ribonucleoside diphosphate metabolic process	58	0.448	Biological Process	GO:0009179	purine ribonucleoside diphosphate metabolic process
GO:0009185 ribonucleoside diphosphate metabolic process	58	0.448	Biological Process	GO:0009185	ribonucleoside diphosphate metabolic process
GO:0009186 deoxyribonucleoside diphosphate metabolic process	3	0.023	Biological Process	GO:0009186	deoxyribonucleoside diphosphate metabolic process
GO:0009189 deoxyribonucleoside diphosphate biosynthetic process	1	0.008	Biological Process	GO:0009189	deoxyribonucleoside diphosphate biosynthetic process
GO:0009196 pyrimidine deoxyribonucleoside diphosphate metabolic process	1	0.008	Biological Process	GO:0009196	pyrimidine deoxyribonucleoside diphosphate metabolic process
GO:0009197 pyrimidine deoxyribonucleoside diphosphate biosynthetic process	1	0.008	Biological Process	GO:0009197	pyrimidine deoxyribonucleoside diphosphate biosynthetic process
GO:0009199 ribonucleoside triphosphate metabolic process	96	0.742	Biological Process	GO:0009199	ribonucleoside triphosphate metabolic process
GO:0009200 deoxyribonucleoside triphosphate metabolic process	2	0.015	Biological Process	GO:0009200	deoxyribonucleoside triphosphate metabolic process
GO:0009201 ribonucleoside triphosphate biosynthetic process	26	0.201	Biological Process	GO:0009201	ribonucleoside triphosphate biosynthetic process
GO:0009205 purine ribonucleoside triphosphate metabolic process	96	0.742	Biological Process	GO:0009205	purine ribonucleoside triphosphate metabolic process
GO:0009206 purine ribonucleoside triphosphate biosynthetic process	26	0.201	Biological Process	GO:0009206	purine ribonucleoside triphosphate biosynthetic process
GO:0009208 pyrimidine ribonucleoside triphosphate metabolic process	5	0.039	Biological Process	GO:0009208	pyrimidine ribonucleoside triphosphate metabolic process
GO:0009209 pyrimidine ribonucleoside triphosphate biosynthetic process	5	0.039	Biological Process	GO:0009209	pyrimidine ribonucleoside triphosphate biosynthetic process
GO:0009211 pyrimidine deoxyribonucleoside triphosphate metabolic process	2	0.015	Biological Process	GO:0009211	pyrimidine deoxyribonucleoside triphosphate metabolic process
GO:0009218 pyrimidine ribonucleotide metabolic process	9	0.07	Biological Process	GO:0009218	pyrimidine ribonucleotide metabolic process
GO:0009219 pyrimidine deoxyribonucleotide metabolic process	7	0.054	Biological Process	GO:0009219	pyrimidine deoxyribonucleotide metabolic process
GO:0009220 pyrimidine ribonucleotide biosynthetic process	9	0.07	Biological Process	GO:0009220	pyrimidine ribonucleotide biosynthetic process
GO:0009221 pyrimidine deoxyribonucleotide biosynthetic process	5	0.039	Biological Process	GO:0009221	pyrimidine deoxyribonucleotide biosynthetic process
GO:0009225 nucleotide-sugar metabolic process	4	0.031	Biological Process	GO:0009225	nucleotide-sugar metabolic process
GO:0009226 nucleotide-sugar biosynthetic process	3	0.023	Biological Process	GO:0009226	nucleotide-sugar biosynthetic process
GO:0009228 thiamine biosynthetic process	3	0.023	Biological Process	GO:0009228	thiamine biosynthetic process
GO:0009229 thiamine diphosphate biosynthetic process	1	0.008	Biological Process	GO:0009229	thiamine diphosphate biosynthetic process
GO:0009231 riboflavin biosynthetic process	11	0.085	Biological Process	GO:0009231	riboflavin biosynthetic process
GO:0009235 cobalamin metabolic process	1	0.008	Biological Process	GO:0009235	cobalamin metabolic process
GO:0009236 cobalamin biosynthetic process	1	0.008	Biological Process	GO:0009236	cobalamin biosynthetic process
GO:0009240 isopentenyl diphosphate biosynthetic process	3	0.023	Biological Process	GO:0009240	isopentenyl diphosphate biosynthetic process
GO:0009245 lipid A biosynthetic process	3	0.023	Biological Process	GO:0009245	lipid A biosynthetic process
GO:0009247 glycolipid biosynthetic process	20	0.155	Biological Process	GO:0009247	glycolipid biosynthetic process
GO:0009250 glucan biosynthetic process	95	0.734	Biological Process	GO:0009250	glucan biosynthetic process
GO:0009251 glucan catabolic process	1	0.008	Biological Process	GO:0009251	glucan catabolic process
GO:0009259 ribonucleotide metabolic process	121	0.935	Biological Process	GO:0009259	ribonucleotide metabolic process
GO:0009260 ribonucleotide biosynthetic process	39	0.301	Biological Process	GO:0009260	ribonucleotide biosynthetic process
GO:0009262 deoxyribonucleotide metabolic process	8	0.062	Biological Process	GO:0009262	deoxyribonucleotide metabolic process
GO:0009263 deoxyribonucleotide biosynthetic process	5	0.039	Biological Process	GO:0009263	deoxyribonucleotide biosynthetic process
GO:0009264 deoxyribonucleotide catabolic process	1	0.008	Biological Process	GO:0009264	deoxyribonucleotide catabolic process
GO:0009265 2'-deoxyribonucleotide biosynthetic process	5	0.039	Biological Process	GO:0009265	2'-deoxyribonucleotide biosynthetic process
GO:0009266 response to temperature stimulus	1	0.008	Biological Process	GO:0009266	response to temperature stimulus
GO:0009267 cellular response to starvation	4	0.031	Biological Process	GO:0009267	cellular response to starvation
GO:0009269 response to desiccation	3	0.023	Biological Process	GO:0009269	response to desiccation
GO:0009298 GDP-mannose biosynthetic process	3	0.023	Biological Process	GO:0009298	GDP-mannose biosynthetic process
GO:0009308 amine metabolic process	58	0.448	Biological Process	GO:0009308	amine metabolic process
GO:0009309 amine biosynthetic process	14	0.108	Biological Process	GO:0009309	amine biosynthetic process
GO:0009310 amine catabolic process	3	0.023	Biological Process	GO:0009310	amine catabolic process
GO:0009311 oligosaccharide metabolic process	55	0.425	Biological Process	GO:0009311	oligosaccharide metabolic process
GO:0009312 oligosaccharide biosynthetic process	22	0.17	Biological Process	GO:0009312	oligosaccharide biosynthetic process
GO:0009314 response to radiation	10	0.077	Biological Process	GO:0009314	response to radiation
GO:0009394 2'-deoxyribonucleotide metabolic process	7	0.054	Biological Process	GO:0009394	2'-deoxyribonucleotide metabolic process
GO:0009396 folic acid-containing compound biosynthetic process	16	0.124	Biological Process	GO:0009396	folic acid-containing compound biosynthetic process
GO:0009409 response to cold	1	0.008	Biological Process	GO:0009409	response to cold
GO:0009414 response to water deprivation	3	0.023	Biological Process	GO:0009414	response to water deprivation
GO:0009415 response to water	10	0.077	Biological Process	GO:0009415	response to water
GO:0009416 response to light stimulus	9	0.07	Biological Process	GO:0009416	response to light stimulus
GO:0009432 SOS response	4	0.031	Biological Process	GO:0009432	SOS response
GO:0009435 NAD biosynthetic process	4	0.031	Biological Process	GO:0009435	NAD biosynthetic process
GO:0009438 methylglyoxal metabolic process	1	0.008	Biological Process	GO:0009438	methylglyoxal metabolic process
GO:0009439 cyanate metabolic process	1	0.008	Biological Process	GO:0009439	cyanate metabolic process
GO:0009443 pyridoxal 5'-phosphate salvage	1	0.008	Biological Process	GO:0009443	pyridoxal 5'-phosphate salvage
GO:0009445 putrescine metabolic process	1	0.008	Biological Process	GO:0009445	putrescine metabolic process
GO:0009446 putrescine biosynthetic process	1	0.008	Biological Process	GO:0009446	putrescine biosynthetic process
GO:0009451 RNA modification	61	0.472	Biological Process	GO:0009451	RNA modification
GO:0009452 7-methylguanosine RNA capping	4	0.031	Biological Process	GO:0009452	7-methylguanosine RNA capping
GO:0009555 pollen development	1	0.008	Biological Process	GO:0009555	pollen development
GO:0009581 detection of external stimulus	4	0.031	Biological Process	GO:0009581	detection of external stimulus
GO:0009582 detection of abiotic stimulus	4	0.031	Biological Process	GO:0009582	detection of abiotic stimulus
GO:0009583 detection of light stimulus	4	0.031	Biological Process	GO:0009583	detection of light stimulus
GO:0009584 detection of visible light	4	0.031	Biological Process	GO:0009584	detection of visible light
GO:0009585 red, far-red light phototransduction	4	0.031	Biological Process	GO:0009585	red, far-red light phototransduction
GO:0009605 response to external stimulus	34	0.263	Biological Process	GO:0009605	response to external stimulus
GO:0009606 tropism	3	0.023	Biological Process	GO:0009606	tropism
GO:0009607 response to biotic stimulus	108	0.835	Biological Process	GO:0009607	response to biotic stimulus
GO:0009611 response to wounding	3	0.023	Biological Process	GO:0009611	response to wounding
GO:0009617 response to bacterium	8	0.062	Biological Process	GO:0009617	response to bacterium
GO:0009620 response to fungus	6	0.046	Biological Process	GO:0009620	response to fungus
GO:0009626 plant-type hypersensitive response	3	0.023	Biological Process	GO:0009626	plant-type hypersensitive response
GO:0009627 systemic acquired resistance	4	0.031	Biological Process	GO:0009627	systemic acquired resistance
GO:0009628 response to abiotic stimulus	27	0.209	Biological Process	GO:0009628	response to abiotic stimulus
GO:0009629 response to gravity	1	0.008	Biological Process	GO:0009629	response to gravity
GO:0009630 gravitropism	1	0.008	Biological Process	GO:0009630	gravitropism
GO:0009636 response to toxic substance	1	0.008	Biological Process	GO:0009636	response to toxic substance
GO:0009637 response to blue light	2	0.015	Biological Process	GO:0009637	response to blue light
GO:0009638 phototropism	2	0.015	Biological Process	GO:0009638	phototropism
GO:0009639 response to red or far red light	4	0.031	Biological Process	GO:0009639	response to red or far red light
GO:0009642 response to light intensity	1	0.008	Biological Process	GO:0009642	response to light intensity
GO:0009644 response to high light intensity	1	0.008	Biological Process	GO:0009644	response to high light intensity
GO:0009648 photoperiodism	1	0.008	Biological Process	GO:0009648	photoperiodism
GO:0009651 response to salt stress	5	0.039	Biological Process	GO:0009651	response to salt stress
GO:0009653 anatomical structure morphogenesis	4	0.031	Biological Process	GO:0009653	anatomical structure morphogenesis
GO:0009657 plastid organization	8	0.062	Biological Process	GO:0009657	plastid organization
GO:0009658 chloroplast organization	8	0.062	Biological Process	GO:0009658	chloroplast organization
GO:0009664 plant-type cell wall organization	19	0.147	Biological Process	GO:0009664	plant-type cell wall organization
GO:0009682 induced systemic resistance	2	0.015	Biological Process	GO:0009682	induced systemic resistance
GO:0009687 abscisic acid metabolic process	2	0.015	Biological Process	GO:0009687	abscisic acid metabolic process
GO:0009688 abscisic acid biosynthetic process	2	0.015	Biological Process	GO:0009688	abscisic acid biosynthetic process
GO:0009690 cytokinin metabolic process	13	0.1	Biological Process	GO:0009690	cytokinin metabolic process
GO:0009694 jasmonic acid metabolic process	2	0.015	Biological Process	GO:0009694	jasmonic acid metabolic process
GO:0009719 response to endogenous stimulus	101	0.781	Biological Process	GO:0009719	response to endogenous stimulus
GO:0009723 response to ethylene	3	0.023	Biological Process	GO:0009723	response to ethylene
GO:0009725 response to hormone	101	0.781	Biological Process	GO:0009725	response to hormone
GO:0009733 response to auxin	72	0.557	Biological Process	GO:0009733	response to auxin
GO:0009737 response to abscisic acid	4	0.031	Biological Process	GO:0009737	response to abscisic acid
GO:0009741 response to brassinosteroid	3	0.023	Biological Process	GO:0009741	response to brassinosteroid
GO:0009742 brassinosteroid mediated signaling pathway	3	0.023	Biological Process	GO:0009742	brassinosteroid mediated signaling pathway
GO:0009743 response to carbohydrate	4	0.031	Biological Process	GO:0009743	response to carbohydrate
GO:0009744 response to sucrose	4	0.031	Biological Process	GO:0009744	response to sucrose
GO:0009751 response to salicylic acid	49	0.379	Biological Process	GO:0009751	response to salicylic acid
GO:0009753 response to jasmonic acid	2	0.015	Biological Process	GO:0009753	response to jasmonic acid
GO:0009755 hormone-mediated signaling pathway	8	0.062	Biological Process	GO:0009755	hormone-mediated signaling pathway
GO:0009765 photosynthesis, light harvesting	19	0.147	Biological Process	GO:0009765	photosynthesis, light harvesting
GO:0009767 photosynthetic electron transport chain	9	0.07	Biological Process	GO:0009767	photosynthetic electron transport chain
GO:0009772 photosynthetic electron transport in photosystem II	4	0.031	Biological Process	GO:0009772	photosynthetic electron transport in photosystem II
GO:0009790 embryo development	3	0.023	Biological Process	GO:0009790	embryo development
GO:0009791 post-embryonic development	3	0.023	Biological Process	GO:0009791	post-embryonic development
GO:0009814 defense response, incompatible interaction	4	0.031	Biological Process	GO:0009814	defense response, incompatible interaction
GO:0009832 plant-type cell wall biogenesis	20	0.155	Biological Process	GO:0009832	plant-type cell wall biogenesis
GO:0009834 plant-type secondary cell wall biogenesis	4	0.031	Biological Process	GO:0009834	plant-type secondary cell wall biogenesis
GO:0009856 pollination	178	1.376	Biological Process	GO:0009856	pollination
GO:0009863 salicylic acid mediated signaling pathway	49	0.379	Biological Process	GO:0009863	salicylic acid mediated signaling pathway
GO:0009864 induced systemic resistance, jasmonic acid mediated signaling pathway	2	0.015	Biological Process	GO:0009864	induced systemic resistance, jasmonic acid mediated signaling pathway
GO:0009867 jasmonic acid mediated signaling pathway	2	0.015	Biological Process	GO:0009867	jasmonic acid mediated signaling pathway
GO:0009873 ethylene-activated signaling pathway	3	0.023	Biological Process	GO:0009873	ethylene-activated signaling pathway
GO:0009875 pollen-pistil interaction	178	1.376	Biological Process	GO:0009875	pollen-pistil interaction
GO:0009887 organ morphogenesis	1	0.008	Biological Process	GO:0009887	organ morphogenesis
GO:0009888 tissue development	1	0.008	Biological Process	GO:0009888	tissue development
GO:0009889 regulation of biosynthetic process	1000	7.73	Biological Process	GO:0009889	regulation of biosynthetic process
GO:0009890 negative regulation of biosynthetic process	5	0.039	Biological Process	GO:0009890	negative regulation of biosynthetic process
GO:0009891 positive regulation of biosynthetic process	15	0.116	Biological Process	GO:0009891	positive regulation of biosynthetic process
GO:0009892 negative regulation of metabolic process	23	0.178	Biological Process	GO:0009892	negative regulation of metabolic process
GO:0009893 positive regulation of metabolic process	27	0.209	Biological Process	GO:0009893	positive regulation of metabolic process
GO:0009894 regulation of catabolic process	10	0.077	Biological Process	GO:0009894	regulation of catabolic process
GO:0009895 negative regulation of catabolic process	6	0.046	Biological Process	GO:0009895	negative regulation of catabolic process
GO:0009896 positive regulation of catabolic process	1	0.008	Biological Process	GO:0009896	positive regulation of catabolic process
GO:0009902 chloroplast relocation	8	0.062	Biological Process	GO:0009902	chloroplast relocation
GO:0009904 chloroplast accumulation movement	8	0.062	Biological Process	GO:0009904	chloroplast accumulation movement
GO:0009908 flower development	2	0.015	Biological Process	GO:0009908	flower development
GO:0009909 regulation of flower development	1	0.008	Biological Process	GO:0009909	regulation of flower development
GO:0009914 hormone transport	1	0.008	Biological Process	GO:0009914	hormone transport
GO:0009956 radial pattern formation	1	0.008	Biological Process	GO:0009956	radial pattern formation
GO:0009958 positive gravitropism	1	0.008	Biological Process	GO:0009958	positive gravitropism
GO:0009965 leaf morphogenesis	1	0.008	Biological Process	GO:0009965	leaf morphogenesis
GO:0009966 regulation of signal transduction	61	0.472	Biological Process	GO:0009966	regulation of signal transduction
GO:0009967 positive regulation of signal transduction	1	0.008	Biological Process	GO:0009967	positive regulation of signal transduction
GO:0009968 negative regulation of signal transduction	3	0.023	Biological Process	GO:0009968	negative regulation of signal transduction
GO:0009987 cellular process	8087	62.511	Biological Process	GO:0009987	cellular process
GO:0009991 response to extracellular stimulus	15	0.116	Biological Process	GO:0009991	response to extracellular stimulus
GO:0010016 shoot system morphogenesis	4	0.031	Biological Process	GO:0010016	shoot system morphogenesis
GO:0010017 red or far-red light signaling pathway	4	0.031	Biological Process	GO:0010017	red or far-red light signaling pathway
GO:0010024 phytochromobilin biosynthetic process	4	0.031	Biological Process	GO:0010024	phytochromobilin biosynthetic process
GO:0010033 response to organic substance	155	1.198	Biological Process	GO:0010033	response to organic substance
GO:0010035 response to inorganic substance	17	0.131	Biological Process	GO:0010035	response to inorganic substance
GO:0010038 response to metal ion	6	0.046	Biological Process	GO:0010038	response to metal ion
GO:0010104 regulation of ethylene-activated signaling pathway	3	0.023	Biological Process	GO:0010104	regulation of ethylene-activated signaling pathway
GO:0010105 negative regulation of ethylene-activated signaling pathway	3	0.023	Biological Process	GO:0010105	negative regulation of ethylene-activated signaling pathway
GO:0010109 regulation of photosynthesis	2	0.015	Biological Process	GO:0010109	regulation of photosynthesis
GO:0010112 regulation of systemic acquired resistance	4	0.031	Biological Process	GO:0010112	regulation of systemic acquired resistance
GO:0010138 pyrimidine ribonucleotide salvage	4	0.031	Biological Process	GO:0010138	pyrimidine ribonucleotide salvage
GO:0010155 regulation of proton transport	4	0.031	Biological Process	GO:0010155	regulation of proton transport
GO:0010189 vitamin E biosynthetic process	1	0.008	Biological Process	GO:0010189	vitamin E biosynthetic process
GO:0010207 photosystem II assembly	3	0.023	Biological Process	GO:0010207	photosystem II assembly
GO:0010212 response to ionizing radiation	1	0.008	Biological Process	GO:0010212	response to ionizing radiation
GO:0010215 cellulose microfibril organization	16	0.124	Biological Process	GO:0010215	cellulose microfibril organization
GO:0010223 secondary shoot formation	3	0.023	Biological Process	GO:0010223	secondary shoot formation
GO:0010228 vegetative to reproductive phase transition of meristem	1	0.008	Biological Process	GO:0010228	vegetative to reproductive phase transition of meristem
GO:0010256 endomembrane system organization	3	0.023	Biological Process	GO:0010256	endomembrane system organization
GO:0010264 myo-inositol hexakisphosphate biosynthetic process	1	0.008	Biological Process	GO:0010264	myo-inositol hexakisphosphate biosynthetic process
GO:0010338 leaf formation	1	0.008	Biological Process	GO:0010338	leaf formation
GO:0010346 shoot axis formation	3	0.023	Biological Process	GO:0010346	shoot axis formation
GO:0010374 stomatal complex development	1	0.008	Biological Process	GO:0010374	stomatal complex development
GO:0010383 cell wall polysaccharide metabolic process	41	0.317	Biological Process	GO:0010383	cell wall polysaccharide metabolic process
GO:0010389 regulation of G2/M transition of mitotic cell cycle	1	0.008	Biological Process	GO:0010389	regulation of G2/M transition of mitotic cell cycle
GO:0010410 hemicellulose metabolic process	41	0.317	Biological Process	GO:0010410	hemicellulose metabolic process
GO:0010411 xyloglucan metabolic process	37	0.286	Biological Process	GO:0010411	xyloglucan metabolic process
GO:0010430 fatty acid omega-oxidation	1	0.008	Biological Process	GO:0010430	fatty acid omega-oxidation
GO:0010467 gene expression	1708	13.202	Biological Process	GO:0010467	gene expression
GO:0010468 regulation of gene expression	1014	7.838	Biological Process	GO:0010468	regulation of gene expression
GO:0010498 proteasomal protein catabolic process	27	0.209	Biological Process	GO:0010498	proteasomal protein catabolic process
GO:0010506 regulation of autophagy	1	0.008	Biological Process	GO:0010506	regulation of autophagy
GO:0010508 positive regulation of autophagy	1	0.008	Biological Process	GO:0010508	positive regulation of autophagy
GO:0010556 regulation of macromolecule biosynthetic process	1000	7.73	Biological Process	GO:0010556	regulation of macromolecule biosynthetic process
GO:0010557 positive regulation of macromolecule biosynthetic process	15	0.116	Biological Process	GO:0010557	positive regulation of macromolecule biosynthetic process
GO:0010558 negative regulation of macromolecule biosynthetic process	5	0.039	Biological Process	GO:0010558	negative regulation of macromolecule biosynthetic process
GO:0010562 positive regulation of phosphorus metabolic process	6	0.046	Biological Process	GO:0010562	positive regulation of phosphorus metabolic process
GO:0010564 regulation of cell cycle process	35	0.271	Biological Process	GO:0010564	regulation of cell cycle process
GO:0010604 positive regulation of macromolecule metabolic process	22	0.17	Biological Process	GO:0010604	positive regulation of macromolecule metabolic process
GO:0010605 negative regulation of macromolecule metabolic process	22	0.17	Biological Process	GO:0010605	negative regulation of macromolecule metabolic process
GO:0010608 posttranscriptional regulation of gene expression	7	0.054	Biological Process	GO:0010608	posttranscriptional regulation of gene expression
GO:0010628 positive regulation of gene expression	15	0.116	Biological Process	GO:0010628	positive regulation of gene expression
GO:0010629 negative regulation of gene expression	13	0.1	Biological Process	GO:0010629	negative regulation of gene expression
GO:0010638 positive regulation of organelle organization	18	0.139	Biological Process	GO:0010638	positive regulation of organelle organization
GO:0010639 negative regulation of organelle organization	8	0.062	Biological Process	GO:0010639	negative regulation of organelle organization
GO:0010646 regulation of cell communication	61	0.472	Biological Process	GO:0010646	regulation of cell communication
GO:0010647 positive regulation of cell communication	1	0.008	Biological Process	GO:0010647	positive regulation of cell communication
GO:0010648 negative regulation of cell communication	3	0.023	Biological Process	GO:0010648	negative regulation of cell communication
GO:0010817 regulation of hormone levels	14	0.108	Biological Process	GO:0010817	regulation of hormone levels
GO:0010876 lipid localization	27	0.209	Biological Process	GO:0010876	lipid localization
GO:0010921 regulation of phosphatase activity	1	0.008	Biological Process	GO:0010921	regulation of phosphatase activity
GO:0010941 regulation of cell death	3	0.023	Biological Process	GO:0010941	regulation of cell death
GO:0010948 negative regulation of cell cycle process	7	0.054	Biological Process	GO:0010948	negative regulation of cell cycle process
GO:0010965 regulation of mitotic sister chromatid separation	26	0.201	Biological Process	GO:0010965	regulation of mitotic sister chromatid separation
GO:0010968 regulation of microtubule nucleation	7	0.054	Biological Process	GO:0010968	regulation of microtubule nucleation
GO:0010972 negative regulation of G2/M transition of mitotic cell cycle	1	0.008	Biological Process	GO:0010972	negative regulation of G2/M transition of mitotic cell cycle
GO:0012501 programmed cell death	3	0.023	Biological Process	GO:0012501	programmed cell death
GO:0014070 response to organic cyclic compound	52	0.402	Biological Process	GO:0014070	response to organic cyclic compound
GO:0015012 heparan sulfate proteoglycan biosynthetic process	4	0.031	Biological Process	GO:0015012	heparan sulfate proteoglycan biosynthetic process
GO:0015031 protein transport	265	2.048	Biological Process	GO:0015031	protein transport
GO:0015074 DNA integration	20	0.155	Biological Process	GO:0015074	DNA integration
GO:0015672 monovalent inorganic cation transport	117	0.904	Biological Process	GO:0015672	monovalent inorganic cation transport
GO:0015684 ferrous iron transport	1	0.008	Biological Process	GO:0015684	ferrous iron transport
GO:0015689 molybdate ion transport	5	0.039	Biological Process	GO:0015689	molybdate ion transport
GO:0015693 magnesium ion transport	14	0.108	Biological Process	GO:0015693	magnesium ion transport
GO:0015696 ammonium transport	7	0.054	Biological Process	GO:0015696	ammonium transport
GO:0015698 inorganic anion transport	35	0.271	Biological Process	GO:0015698	inorganic anion transport
GO:0015711 organic anion transport	71	0.549	Biological Process	GO:0015711	organic anion transport
GO:0015718 monocarboxylic acid transport	5	0.039	Biological Process	GO:0015718	monocarboxylic acid transport
GO:0015740 C4-dicarboxylate transport	22	0.17	Biological Process	GO:0015740	C4-dicarboxylate transport
GO:0015743 malate transport	22	0.17	Biological Process	GO:0015743	malate transport
GO:0015748 organophosphate ester transport	22	0.17	Biological Process	GO:0015748	organophosphate ester transport
GO:0015766 disaccharide transport	1	0.008	Biological Process	GO:0015766	disaccharide transport
GO:0015770 sucrose transport	1	0.008	Biological Process	GO:0015770	sucrose transport
GO:0015772 oligosaccharide transport	1	0.008	Biological Process	GO:0015772	oligosaccharide transport
GO:0015780 nucleotide-sugar transport	8	0.062	Biological Process	GO:0015780	nucleotide-sugar transport
GO:0015833 peptide transport	19	0.147	Biological Process	GO:0015833	peptide transport
GO:0015840 urea transport	2	0.015	Biological Process	GO:0015840	urea transport
GO:0015849 organic acid transport	57	0.441	Biological Process	GO:0015849	organic acid transport
GO:0015851 nucleobase transport	2	0.015	Biological Process	GO:0015851	nucleobase transport
GO:0015893 drug transport	85	0.657	Biological Process	GO:0015893	drug transport
GO:0015914 phospholipid transport	14	0.108	Biological Process	GO:0015914	phospholipid transport
GO:0015931 nucleobase-containing compound transport	10	0.077	Biological Process	GO:0015931	nucleobase-containing compound transport
GO:0015936 coenzyme A metabolic process	11	0.085	Biological Process	GO:0015936	coenzyme A metabolic process
GO:0015937 coenzyme A biosynthetic process	4	0.031	Biological Process	GO:0015937	coenzyme A biosynthetic process
GO:0015939 pantothenate metabolic process	3	0.023	Biological Process	GO:0015939	pantothenate metabolic process
GO:0015940 pantothenate biosynthetic process	3	0.023	Biological Process	GO:0015940	pantothenate biosynthetic process
GO:0015969 guanosine tetraphosphate metabolic process	5	0.039	Biological Process	GO:0015969	guanosine tetraphosphate metabolic process
GO:0015976 carbon utilization	3	0.023	Biological Process	GO:0015976	carbon utilization
GO:0015977 carbon fixation	4	0.031	Biological Process	GO:0015977	carbon fixation
GO:0015979 photosynthesis	74	0.572	Biological Process	GO:0015979	photosynthesis
GO:0015980 energy derivation by oxidation of organic compounds	28	0.216	Biological Process	GO:0015980	energy derivation by oxidation of organic compounds
GO:0015985 energy coupled proton transport, down electrochemical gradient	20	0.155	Biological Process	GO:0015985	energy coupled proton transport, down electrochemical gradient
GO:0015986 ATP synthesis coupled proton transport	20	0.155	Biological Process	GO:0015986	ATP synthesis coupled proton transport
GO:0015988 energy coupled proton transmembrane transport, against electrochemical gradient	25	0.193	Biological Process	GO:0015988	energy coupled proton transmembrane transport, against electrochemical gradient
GO:0015991 ATP hydrolysis coupled proton transport	25	0.193	Biological Process	GO:0015991	ATP hydrolysis coupled proton transport
GO:0015992 proton transport	70	0.541	Biological Process	GO:0015992	proton transport
GO:0015994 chlorophyll metabolic process	4	0.031	Biological Process	GO:0015994	chlorophyll metabolic process
GO:0015995 chlorophyll biosynthetic process	1	0.008	Biological Process	GO:0015995	chlorophyll biosynthetic process
GO:0015996 chlorophyll catabolic process	3	0.023	Biological Process	GO:0015996	chlorophyll catabolic process
GO:0016036 cellular response to phosphate starvation	4	0.031	Biological Process	GO:0016036	cellular response to phosphate starvation
GO:0016042 lipid catabolic process	21	0.162	Biological Process	GO:0016042	lipid catabolic process
GO:0016043 cellular component organization	455	3.517	Biological Process	GO:0016043	cellular component organization
GO:0016049 cell growth	19	0.147	Biological Process	GO:0016049	cell growth
GO:0016050 vesicle organization	2	0.015	Biological Process	GO:0016050	vesicle organization
GO:0016051 carbohydrate biosynthetic process	138	1.067	Biological Process	GO:0016051	carbohydrate biosynthetic process
GO:0016052 carbohydrate catabolic process	72	0.557	Biological Process	GO:0016052	carbohydrate catabolic process
GO:0016053 organic acid biosynthetic process	204	1.577	Biological Process	GO:0016053	organic acid biosynthetic process
GO:0016054 organic acid catabolic process	20	0.155	Biological Process	GO:0016054	organic acid catabolic process
GO:0016070 RNA metabolic process	1441	11.139	Biological Process	GO:0016070	RNA metabolic process
GO:0016071 mRNA metabolic process	97	0.75	Biological Process	GO:0016071	mRNA metabolic process
GO:0016072 rRNA metabolic process	29	0.224	Biological Process	GO:0016072	rRNA metabolic process
GO:0016073 snRNA metabolic process	2	0.015	Biological Process	GO:0016073	snRNA metabolic process
GO:0016106 sesquiterpenoid biosynthetic process	4	0.031	Biological Process	GO:0016106	sesquiterpenoid biosynthetic process
GO:0016108 tetraterpenoid metabolic process	3	0.023	Biological Process	GO:0016108	tetraterpenoid metabolic process
GO:0016109 tetraterpenoid biosynthetic process	3	0.023	Biological Process	GO:0016109	tetraterpenoid biosynthetic process
GO:0016114 terpenoid biosynthetic process	13	0.1	Biological Process	GO:0016114	terpenoid biosynthetic process
GO:0016116 carotenoid metabolic process	3	0.023	Biological Process	GO:0016116	carotenoid metabolic process
GO:0016117 carotenoid biosynthetic process	3	0.023	Biological Process	GO:0016117	carotenoid biosynthetic process
GO:0016125 sterol metabolic process	1	0.008	Biological Process	GO:0016125	sterol metabolic process
GO:0016180 snRNA processing	2	0.015	Biological Process	GO:0016180	snRNA processing
GO:0016192 vesicle-mediated transport	140	1.082	Biological Process	GO:0016192	vesicle-mediated transport
GO:0016197 endosomal transport	4	0.031	Biological Process	GO:0016197	endosomal transport
GO:0016226 iron-sulfur cluster assembly	11	0.085	Biological Process	GO:0016226	iron-sulfur cluster assembly
GO:0016255 attachment of GPI anchor to protein	3	0.023	Biological Process	GO:0016255	attachment of GPI anchor to protein
GO:0016265 death	6	0.046	Biological Process	GO:0016265	death
GO:0016310 phosphorylation	1991	15.39	Biological Process	GO:0016310	phosphorylation
GO:0016311 dephosphorylation	111	0.858	Biological Process	GO:0016311	dephosphorylation
GO:0016441 posttranscriptional gene silencing	1	0.008	Biological Process	GO:0016441	posttranscriptional gene silencing
GO:0016458 gene silencing	10	0.077	Biological Process	GO:0016458	gene silencing
GO:0016477 cell migration	1	0.008	Biological Process	GO:0016477	cell migration
GO:0016480 negative regulation of transcription from RNA polymerase III promoter	1	0.008	Biological Process	GO:0016480	negative regulation of transcription from RNA polymerase III promoter
GO:0016482 cytoplasmic transport	118	0.912	Biological Process	GO:0016482	cytoplasmic transport
GO:0016485 protein processing	9	0.07	Biological Process	GO:0016485	protein processing
GO:0016558 protein import into peroxisome matrix	2	0.015	Biological Process	GO:0016558	protein import into peroxisome matrix
GO:0016559 peroxisome fission	2	0.015	Biological Process	GO:0016559	peroxisome fission
GO:0016560 protein import into peroxisome matrix, docking	1	0.008	Biological Process	GO:0016560	protein import into peroxisome matrix, docking
GO:0016567 protein ubiquitination	126	0.974	Biological Process	GO:0016567	protein ubiquitination
GO:0016568 chromatin modification	50	0.386	Biological Process	GO:0016568	chromatin modification
GO:0016569 covalent chromatin modification	32	0.247	Biological Process	GO:0016569	covalent chromatin modification
GO:0016570 histone modification	32	0.247	Biological Process	GO:0016570	histone modification
GO:0016571 histone methylation	11	0.085	Biological Process	GO:0016571	histone methylation
GO:0016573 histone acetylation	10	0.077	Biological Process	GO:0016573	histone acetylation
GO:0016575 histone deacetylation	3	0.023	Biological Process	GO:0016575	histone deacetylation
GO:0016579 protein deubiquitination	37	0.286	Biological Process	GO:0016579	protein deubiquitination
GO:0016598 protein arginylation	6	0.046	Biological Process	GO:0016598	protein arginylation
GO:0016925 protein sumoylation	4	0.031	Biological Process	GO:0016925	protein sumoylation
GO:0016973 poly(A)+ mRNA export from nucleus	1	0.008	Biological Process	GO:0016973	poly(A)+ mRNA export from nucleus
GO:0016998 cell wall macromolecule catabolic process	21	0.162	Biological Process	GO:0016998	cell wall macromolecule catabolic process
GO:0017003 protein-heme linkage	1	0.008	Biological Process	GO:0017003	protein-heme linkage
GO:0017004 cytochrome complex assembly	11	0.085	Biological Process	GO:0017004	cytochrome complex assembly
GO:0017006 protein-tetrapyrrole linkage	6	0.046	Biological Process	GO:0017006	protein-tetrapyrrole linkage
GO:0017007 protein-bilin linkage	1	0.008	Biological Process	GO:0017007	protein-bilin linkage
GO:0017009 protein-phycocyanobilin linkage	1	0.008	Biological Process	GO:0017009	protein-phycocyanobilin linkage
GO:0017038 protein import	23	0.178	Biological Process	GO:0017038	protein import
GO:0017062 respiratory chain complex III assembly	8	0.062	Biological Process	GO:0017062	respiratory chain complex III assembly
GO:0017148 negative regulation of translation	1	0.008	Biological Process	GO:0017148	negative regulation of translation
GO:0017182 peptidyl-diphthamide metabolic process	2	0.015	Biological Process	GO:0017182	peptidyl-diphthamide metabolic process
GO:0017183 peptidyl-diphthamide biosynthetic process from peptidyl-histidine	2	0.015	Biological Process	GO:0017183	peptidyl-diphthamide biosynthetic process from peptidyl-histidine
GO:0018022 peptidyl-lysine methylation	12	0.093	Biological Process	GO:0018022	peptidyl-lysine methylation
GO:0018026 peptidyl-lysine monomethylation	1	0.008	Biological Process	GO:0018026	peptidyl-lysine monomethylation
GO:0018065 protein-cofactor linkage	1	0.008	Biological Process	GO:0018065	protein-cofactor linkage
GO:0018130 heterocycle biosynthetic process	1289	9.964	Biological Process	GO:0018130	heterocycle biosynthetic process
GO:0018160 peptidyl-pyrromethane cofactor linkage	1	0.008	Biological Process	GO:0018160	peptidyl-pyrromethane cofactor linkage
GO:0018193 peptidyl-amino acid modification	67	0.518	Biological Process	GO:0018193	peptidyl-amino acid modification
GO:0018195 peptidyl-arginine modification	1	0.008	Biological Process	GO:0018195	peptidyl-arginine modification
GO:0018196 peptidyl-asparagine modification	1	0.008	Biological Process	GO:0018196	peptidyl-asparagine modification
GO:0018198 peptidyl-cysteine modification	1	0.008	Biological Process	GO:0018198	peptidyl-cysteine modification
GO:0018202 peptidyl-histidine modification	2	0.015	Biological Process	GO:0018202	peptidyl-histidine modification
GO:0018205 peptidyl-lysine modification	27	0.209	Biological Process	GO:0018205	peptidyl-lysine modification
GO:0018208 peptidyl-proline modification	35	0.271	Biological Process	GO:0018208	peptidyl-proline modification
GO:0018216 peptidyl-arginine methylation	1	0.008	Biological Process	GO:0018216	peptidyl-arginine methylation
GO:0018279 protein N-linked glycosylation via asparagine	1	0.008	Biological Process	GO:0018279	protein N-linked glycosylation via asparagine
GO:0018298 protein-chromophore linkage	4	0.031	Biological Process	GO:0018298	protein-chromophore linkage
GO:0018342 protein prenylation	10	0.077	Biological Process	GO:0018342	protein prenylation
GO:0018343 protein farnesylation	1	0.008	Biological Process	GO:0018343	protein farnesylation
GO:0018344 protein geranylgeranylation	6	0.046	Biological Process	GO:0018344	protein geranylgeranylation
GO:0018377 protein myristoylation	3	0.023	Biological Process	GO:0018377	protein myristoylation
GO:0018393 internal peptidyl-lysine acetylation	10	0.077	Biological Process	GO:0018393	internal peptidyl-lysine acetylation
GO:0018394 peptidyl-lysine acetylation	10	0.077	Biological Process	GO:0018394	peptidyl-lysine acetylation
GO:0018410 C-terminal protein amino acid modification	2	0.015	Biological Process	GO:0018410	C-terminal protein amino acid modification
GO:0018904 ether metabolic process	35	0.271	Biological Process	GO:0018904	ether metabolic process
GO:0019184 nonribosomal peptide biosynthetic process	2	0.015	Biological Process	GO:0019184	nonribosomal peptide biosynthetic process
GO:0019216 regulation of lipid metabolic process	1	0.008	Biological Process	GO:0019216	regulation of lipid metabolic process
GO:0019219 regulation of nucleobase-containing compound metabolic process	1001	7.737	Biological Process	GO:0019219	regulation of nucleobase-containing compound metabolic process
GO:0019220 regulation of phosphate metabolic process	13	0.1	Biological Process	GO:0019220	regulation of phosphate metabolic process
GO:0019222 regulation of metabolic process	1053	8.139	Biological Process	GO:0019222	regulation of metabolic process
GO:0019243 methylglyoxal catabolic process to D-lactate via S-lactoyl-glutathione	1	0.008	Biological Process	GO:0019243	methylglyoxal catabolic process to D-lactate via S-lactoyl-glutathione
GO:0019288 isopentenyl diphosphate biosynthetic process, methylerythritol 4-phosphate pathway	3	0.023	Biological Process	GO:0019288	isopentenyl diphosphate biosynthetic process, methylerythritol 4-phosphate pathway
GO:0019295 coenzyme M biosynthetic process	1	0.008	Biological Process	GO:0019295	coenzyme M biosynthetic process
GO:0019296 coenzyme M metabolic process	1	0.008	Biological Process	GO:0019296	coenzyme M metabolic process
GO:0019310 inositol catabolic process	3	0.023	Biological Process	GO:0019310	inositol catabolic process
GO:0019318 hexose metabolic process	43	0.332	Biological Process	GO:0019318	hexose metabolic process
GO:0019319 hexose biosynthetic process	16	0.124	Biological Process	GO:0019319	hexose biosynthetic process
GO:0019320 hexose catabolic process	2	0.015	Biological Process	GO:0019320	hexose catabolic process
GO:0019321 pentose metabolic process	2	0.015	Biological Process	GO:0019321	pentose metabolic process
GO:0019344 cysteine biosynthetic process	15	0.116	Biological Process	GO:0019344	cysteine biosynthetic process
GO:0019359 nicotinamide nucleotide biosynthetic process	10	0.077	Biological Process	GO:0019359	nicotinamide nucleotide biosynthetic process
GO:0019362 pyridine nucleotide metabolic process	78	0.603	Biological Process	GO:0019362	pyridine nucleotide metabolic process
GO:0019363 pyridine nucleotide biosynthetic process	10	0.077	Biological Process	GO:0019363	pyridine nucleotide biosynthetic process
GO:0019370 leukotriene biosynthetic process	2	0.015	Biological Process	GO:0019370	leukotriene biosynthetic process
GO:0019377 glycolipid catabolic process	4	0.031	Biological Process	GO:0019377	glycolipid catabolic process
GO:0019395 fatty acid oxidation	5	0.039	Biological Process	GO:0019395	fatty acid oxidation
GO:0019400 alditol metabolic process	10	0.077	Biological Process	GO:0019400	alditol metabolic process
GO:0019430 removal of superoxide radicals	1	0.008	Biological Process	GO:0019430	removal of superoxide radicals
GO:0019432 triglyceride biosynthetic process	1	0.008	Biological Process	GO:0019432	triglyceride biosynthetic process
GO:0019438 aromatic compound biosynthetic process	1275	9.855	Biological Process	GO:0019438	aromatic compound biosynthetic process
GO:0019439 aromatic compound catabolic process	30	0.232	Biological Process	GO:0019439	aromatic compound catabolic process
GO:0019441 tryptophan catabolic process to kynurenine	3	0.023	Biological Process	GO:0019441	tryptophan catabolic process to kynurenine
GO:0019478 D-amino acid catabolic process	2	0.015	Biological Process	GO:0019478	D-amino acid catabolic process
GO:0019499 cyanide metabolic process	1	0.008	Biological Process	GO:0019499	cyanide metabolic process
GO:0019509 L-methionine biosynthetic process from methylthioadenosine	1	0.008	Biological Process	GO:0019509	L-methionine biosynthetic process from methylthioadenosine
GO:0019538 protein metabolic process	3319	25.655	Biological Process	GO:0019538	protein metabolic process
GO:0019566 arabinose metabolic process	2	0.015	Biological Process	GO:0019566	arabinose metabolic process
GO:0019627 urea metabolic process	1	0.008	Biological Process	GO:0019627	urea metabolic process
GO:0019637 organophosphate metabolic process	293	2.265	Biological Process	GO:0019637	organophosphate metabolic process
GO:0019673 GDP-mannose metabolic process	3	0.023	Biological Process	GO:0019673	GDP-mannose metabolic process
GO:0019674 NAD metabolic process	4	0.031	Biological Process	GO:0019674	NAD metabolic process
GO:0019682 glyceraldehyde-3-phosphate metabolic process	13	0.1	Biological Process	GO:0019682	glyceraldehyde-3-phosphate metabolic process
GO:0019684 photosynthesis, light reaction	33	0.255	Biological Process	GO:0019684	photosynthesis, light reaction
GO:0019692 deoxyribose phosphate metabolic process	7	0.054	Biological Process	GO:0019692	deoxyribose phosphate metabolic process
GO:0019693 ribose phosphate metabolic process	131	1.013	Biological Process	GO:0019693	ribose phosphate metabolic process
GO:0019720 Mo-molybdopterin cofactor metabolic process	4	0.031	Biological Process	GO:0019720	Mo-molybdopterin cofactor metabolic process
GO:0019725 cellular homeostasis	118	0.912	Biological Process	GO:0019725	cellular homeostasis
GO:0019740 nitrogen utilization	2	0.015	Biological Process	GO:0019740	nitrogen utilization
GO:0019748 secondary metabolic process	5	0.039	Biological Process	GO:0019748	secondary metabolic process
GO:0019750 chloroplast localization	8	0.062	Biological Process	GO:0019750	chloroplast localization
GO:0019751 polyol metabolic process	20	0.155	Biological Process	GO:0019751	polyol metabolic process
GO:0019752 carboxylic acid metabolic process	458	3.54	Biological Process	GO:0019752	carboxylic acid metabolic process
GO:0019755 one-carbon compound transport	2	0.015	Biological Process	GO:0019755	one-carbon compound transport
GO:0019856 pyrimidine nucleobase biosynthetic process	3	0.023	Biological Process	GO:0019856	pyrimidine nucleobase biosynthetic process
GO:0019915 lipid storage	1	0.008	Biological Process	GO:0019915	lipid storage
GO:0019941 modification-dependent protein catabolic process	114	0.881	Biological Process	GO:0019941	modification-dependent protein catabolic process
GO:0019953 sexual reproduction	1	0.008	Biological Process	GO:0019953	sexual reproduction
GO:0019985 translesion synthesis	4	0.031	Biological Process	GO:0019985	translesion synthesis
GO:0019988 charged-tRNA amino acid modification	1	0.008	Biological Process	GO:0019988	charged-tRNA amino acid modification
GO:0022402 cell cycle process	99	0.765	Biological Process	GO:0022402	cell cycle process
GO:0022403 cell cycle phase	1	0.008	Biological Process	GO:0022403	cell cycle phase
GO:0022406 membrane docking	12	0.093	Biological Process	GO:0022406	membrane docking
GO:0022411 cellular component disassembly	31	0.24	Biological Process	GO:0022411	cellular component disassembly
GO:0022414 reproductive process	184	1.422	Biological Process	GO:0022414	reproductive process
GO:0022607 cellular component assembly	128	0.989	Biological Process	GO:0022607	cellular component assembly
GO:0022610 biological adhesion	1	0.008	Biological Process	GO:0022610	biological adhesion
GO:0022613 ribonucleoprotein complex biogenesis	60	0.464	Biological Process	GO:0022613	ribonucleoprotein complex biogenesis
GO:0022615 protein to membrane docking	1	0.008	Biological Process	GO:0022615	protein to membrane docking
GO:0022616 DNA strand elongation	1	0.008	Biological Process	GO:0022616	DNA strand elongation
GO:0022618 ribonucleoprotein complex assembly	14	0.108	Biological Process	GO:0022618	ribonucleoprotein complex assembly
GO:0022900 electron transport chain	18	0.139	Biological Process	GO:0022900	electron transport chain
GO:0022904 respiratory electron transport chain	6	0.046	Biological Process	GO:0022904	respiratory electron transport chain
GO:0023051 regulation of signaling	61	0.472	Biological Process	GO:0023051	regulation of signaling
GO:0023052 signaling	1127	8.711	Biological Process	GO:0023052	signaling
GO:0023056 positive regulation of signaling	1	0.008	Biological Process	GO:0023056	positive regulation of signaling
GO:0023057 negative regulation of signaling	3	0.023	Biological Process	GO:0023057	negative regulation of signaling
GO:0030001 metal ion transport	197	1.523	Biological Process	GO:0030001	metal ion transport
GO:0030003 cellular cation homeostasis	5	0.039	Biological Process	GO:0030003	cellular cation homeostasis
GO:0030004 cellular monovalent inorganic cation homeostasis	1	0.008	Biological Process	GO:0030004	cellular monovalent inorganic cation homeostasis
GO:0030007 cellular potassium ion homeostasis	1	0.008	Biological Process	GO:0030007	cellular potassium ion homeostasis
GO:0030029 actin filament-based process	42	0.325	Biological Process	GO:0030029	actin filament-based process
GO:0030036 actin cytoskeleton organization	42	0.325	Biological Process	GO:0030036	actin cytoskeleton organization
GO:0030041 actin filament polymerization	13	0.1	Biological Process	GO:0030041	actin filament polymerization
GO:0030042 actin filament depolymerization	11	0.085	Biological Process	GO:0030042	actin filament depolymerization
GO:0030071 regulation of mitotic metaphase/anaphase transition	26	0.201	Biological Process	GO:0030071	regulation of mitotic metaphase/anaphase transition
GO:0030091 protein repair	10	0.077	Biological Process	GO:0030091	protein repair
GO:0030100 regulation of endocytosis	1	0.008	Biological Process	GO:0030100	regulation of endocytosis
GO:0030148 sphingolipid biosynthetic process	1	0.008	Biological Process	GO:0030148	sphingolipid biosynthetic process
GO:0030149 sphingolipid catabolic process	4	0.031	Biological Process	GO:0030149	sphingolipid catabolic process
GO:0030150 protein import into mitochondrial matrix	5	0.039	Biological Process	GO:0030150	protein import into mitochondrial matrix
GO:0030154 cell differentiation	1	0.008	Biological Process	GO:0030154	cell differentiation
GO:0030162 regulation of proteolysis	6	0.046	Biological Process	GO:0030162	regulation of proteolysis
GO:0030163 protein catabolic process	133	1.028	Biological Process	GO:0030163	protein catabolic process
GO:0030166 proteoglycan biosynthetic process	4	0.031	Biological Process	GO:0030166	proteoglycan biosynthetic process
GO:0030198 extracellular matrix organization	16	0.124	Biological Process	GO:0030198	extracellular matrix organization
GO:0030201 heparan sulfate proteoglycan metabolic process	4	0.031	Biological Process	GO:0030201	heparan sulfate proteoglycan metabolic process
GO:0030203 glycosaminoglycan metabolic process	4	0.031	Biological Process	GO:0030203	glycosaminoglycan metabolic process
GO:0030243 cellulose metabolic process	64	0.495	Biological Process	GO:0030243	cellulose metabolic process
GO:0030244 cellulose biosynthetic process	64	0.495	Biological Process	GO:0030244	cellulose biosynthetic process
GO:0030258 lipid modification	43	0.332	Biological Process	GO:0030258	lipid modification
GO:0030259 lipid glycosylation	6	0.046	Biological Process	GO:0030259	lipid glycosylation
GO:0030261 chromosome condensation	17	0.131	Biological Process	GO:0030261	chromosome condensation
GO:0030328 prenylcysteine catabolic process	2	0.015	Biological Process	GO:0030328	prenylcysteine catabolic process
GO:0030329 prenylcysteine metabolic process	2	0.015	Biological Process	GO:0030329	prenylcysteine metabolic process
GO:0030334 regulation of cell migration	1	0.008	Biological Process	GO:0030334	regulation of cell migration
GO:0030417 nicotianamine metabolic process	2	0.015	Biological Process	GO:0030417	nicotianamine metabolic process
GO:0030418 nicotianamine biosynthetic process	2	0.015	Biological Process	GO:0030418	nicotianamine biosynthetic process
GO:0030433 ER-associated ubiquitin-dependent protein catabolic process	1	0.008	Biological Process	GO:0030433	ER-associated ubiquitin-dependent protein catabolic process
GO:0030488 tRNA methylation	2	0.015	Biological Process	GO:0030488	tRNA methylation
GO:0030832 regulation of actin filament length	13	0.1	Biological Process	GO:0030832	regulation of actin filament length
GO:0030833 regulation of actin filament polymerization	13	0.1	Biological Process	GO:0030833	regulation of actin filament polymerization
GO:0030834 regulation of actin filament depolymerization	2	0.015	Biological Process	GO:0030834	regulation of actin filament depolymerization
GO:0030835 negative regulation of actin filament depolymerization	2	0.015	Biological Process	GO:0030835	negative regulation of actin filament depolymerization
GO:0030837 negative regulation of actin filament polymerization	2	0.015	Biological Process	GO:0030837	negative regulation of actin filament polymerization
GO:0030838 positive regulation of actin filament polymerization	11	0.085	Biological Process	GO:0030838	positive regulation of actin filament polymerization
GO:0031023 microtubule organizing center organization	1	0.008	Biological Process	GO:0031023	microtubule organizing center organization
GO:0031047 gene silencing by RNA	9	0.07	Biological Process	GO:0031047	gene silencing by RNA
GO:0031109 microtubule polymerization or depolymerization	9	0.07	Biological Process	GO:0031109	microtubule polymerization or depolymerization
GO:0031110 regulation of microtubule polymerization or depolymerization	8	0.062	Biological Process	GO:0031110	regulation of microtubule polymerization or depolymerization
GO:0031112 positive regulation of microtubule polymerization or depolymerization	7	0.054	Biological Process	GO:0031112	positive regulation of microtubule polymerization or depolymerization
GO:0031113 regulation of microtubule polymerization	7	0.054	Biological Process	GO:0031113	regulation of microtubule polymerization
GO:0031116 positive regulation of microtubule polymerization	7	0.054	Biological Process	GO:0031116	positive regulation of microtubule polymerization
GO:0031122 cytoplasmic microtubule organization	1	0.008	Biological Process	GO:0031122	cytoplasmic microtubule organization
GO:0031123 RNA 3'-end processing	8	0.062	Biological Process	GO:0031123	RNA 3'-end processing
GO:0031124 mRNA 3'-end processing	7	0.054	Biological Process	GO:0031124	mRNA 3'-end processing
GO:0031145 anaphase-promoting complex-dependent proteasomal ubiquitin-dependent protein catabolic process	18	0.139	Biological Process	GO:0031145	anaphase-promoting complex-dependent proteasomal ubiquitin-dependent protein catabolic process
GO:0031163 metallo-sulfur cluster assembly	11	0.085	Biological Process	GO:0031163	metallo-sulfur cluster assembly
GO:0031167 rRNA methylation	2	0.015	Biological Process	GO:0031167	rRNA methylation
GO:0031323 regulation of cellular metabolic process	1029	7.954	Biological Process	GO:0031323	regulation of cellular metabolic process
GO:0031324 negative regulation of cellular metabolic process	13	0.1	Biological Process	GO:0031324	negative regulation of cellular metabolic process
GO:0031325 positive regulation of cellular metabolic process	24	0.186	Biological Process	GO:0031325	positive regulation of cellular metabolic process
GO:0031326 regulation of cellular biosynthetic process	1000	7.73	Biological Process	GO:0031326	regulation of cellular biosynthetic process
GO:0031327 negative regulation of cellular biosynthetic process	5	0.039	Biological Process	GO:0031327	negative regulation of cellular biosynthetic process
GO:0031328 positive regulation of cellular biosynthetic process	15	0.116	Biological Process	GO:0031328	positive regulation of cellular biosynthetic process
GO:0031329 regulation of cellular catabolic process	7	0.054	Biological Process	GO:0031329	regulation of cellular catabolic process
GO:0031330 negative regulation of cellular catabolic process	6	0.046	Biological Process	GO:0031330	negative regulation of cellular catabolic process
GO:0031331 positive regulation of cellular catabolic process	1	0.008	Biological Process	GO:0031331	positive regulation of cellular catabolic process
GO:0031333 negative regulation of protein complex assembly	2	0.015	Biological Process	GO:0031333	negative regulation of protein complex assembly
GO:0031334 positive regulation of protein complex assembly	18	0.139	Biological Process	GO:0031334	positive regulation of protein complex assembly
GO:0031347 regulation of defense response	62	0.479	Biological Process	GO:0031347	regulation of defense response
GO:0031349 positive regulation of defense response	2	0.015	Biological Process	GO:0031349	positive regulation of defense response
GO:0031365 N-terminal protein amino acid modification	4	0.031	Biological Process	GO:0031365	N-terminal protein amino acid modification
GO:0031396 regulation of protein ubiquitination	6	0.046	Biological Process	GO:0031396	regulation of protein ubiquitination
GO:0031397 negative regulation of protein ubiquitination	6	0.046	Biological Process	GO:0031397	negative regulation of protein ubiquitination
GO:0031399 regulation of protein modification process	18	0.139	Biological Process	GO:0031399	regulation of protein modification process
GO:0031400 negative regulation of protein modification process	6	0.046	Biological Process	GO:0031400	negative regulation of protein modification process
GO:0031401 positive regulation of protein modification process	6	0.046	Biological Process	GO:0031401	positive regulation of protein modification process
GO:0031497 chromatin assembly	23	0.178	Biological Process	GO:0031497	chromatin assembly
GO:0031570 DNA integrity checkpoint	18	0.139	Biological Process	GO:0031570	DNA integrity checkpoint
GO:0031577 spindle checkpoint	6	0.046	Biological Process	GO:0031577	spindle checkpoint
GO:0031647 regulation of protein stability	1	0.008	Biological Process	GO:0031647	regulation of protein stability
GO:0031667 response to nutrient levels	8	0.062	Biological Process	GO:0031667	response to nutrient levels
GO:0031668 cellular response to extracellular stimulus	15	0.116	Biological Process	GO:0031668	cellular response to extracellular stimulus
GO:0031669 cellular response to nutrient levels	8	0.062	Biological Process	GO:0031669	cellular response to nutrient levels
GO:0031929 TOR signaling	2	0.015	Biological Process	GO:0031929	TOR signaling
GO:0032011 ARF protein signal transduction	5	0.039	Biological Process	GO:0032011	ARF protein signal transduction
GO:0032012 regulation of ARF protein signal transduction	5	0.039	Biological Process	GO:0032012	regulation of ARF protein signal transduction
GO:0032065 cortical protein anchoring	1	0.008	Biological Process	GO:0032065	cortical protein anchoring
GO:0032101 regulation of response to external stimulus	4	0.031	Biological Process	GO:0032101	regulation of response to external stimulus
GO:0032147 activation of protein kinase activity	6	0.046	Biological Process	GO:0032147	activation of protein kinase activity
GO:0032200 telomere organization	7	0.054	Biological Process	GO:0032200	telomere organization
GO:0032259 methylation	55	0.425	Biological Process	GO:0032259	methylation
GO:0032261 purine nucleotide salvage	1	0.008	Biological Process	GO:0032261	purine nucleotide salvage
GO:0032262 pyrimidine nucleotide salvage	4	0.031	Biological Process	GO:0032262	pyrimidine nucleotide salvage
GO:0032264 IMP salvage	1	0.008	Biological Process	GO:0032264	IMP salvage
GO:0032268 regulation of cellular protein metabolic process	24	0.186	Biological Process	GO:0032268	regulation of cellular protein metabolic process
GO:0032269 negative regulation of cellular protein metabolic process	7	0.054	Biological Process	GO:0032269	negative regulation of cellular protein metabolic process
GO:0032270 positive regulation of cellular protein metabolic process	10	0.077	Biological Process	GO:0032270	positive regulation of cellular protein metabolic process
GO:0032271 regulation of protein polymerization	20	0.155	Biological Process	GO:0032271	regulation of protein polymerization
GO:0032272 negative regulation of protein polymerization	2	0.015	Biological Process	GO:0032272	negative regulation of protein polymerization
GO:0032273 positive regulation of protein polymerization	18	0.139	Biological Process	GO:0032273	positive regulation of protein polymerization
GO:0032324 molybdopterin cofactor biosynthetic process	4	0.031	Biological Process	GO:0032324	molybdopterin cofactor biosynthetic process
GO:0032434 regulation of proteasomal ubiquitin-dependent protein catabolic process	6	0.046	Biological Process	GO:0032434	regulation of proteasomal ubiquitin-dependent protein catabolic process
GO:0032435 negative regulation of proteasomal ubiquitin-dependent protein catabolic process	6	0.046	Biological Process	GO:0032435	negative regulation of proteasomal ubiquitin-dependent protein catabolic process
GO:0032446 protein modification by small protein conjugation	132	1.02	Biological Process	GO:0032446	protein modification by small protein conjugation
GO:0032465 regulation of cytokinesis	2	0.015	Biological Process	GO:0032465	regulation of cytokinesis
GO:0032501 multicellular organismal process	230	1.778	Biological Process	GO:0032501	multicellular organismal process
GO:0032502 developmental process	59	0.456	Biological Process	GO:0032502	developmental process
GO:0032504 multicellular organism reproduction	1	0.008	Biological Process	GO:0032504	multicellular organism reproduction
GO:0032506 cytokinetic process	1	0.008	Biological Process	GO:0032506	cytokinetic process
GO:0032507 maintenance of protein location in cell	6	0.046	Biological Process	GO:0032507	maintenance of protein location in cell
GO:0032535 regulation of cellular component size	13	0.1	Biological Process	GO:0032535	regulation of cellular component size
GO:0032768 regulation of monooxygenase activity	1	0.008	Biological Process	GO:0032768	regulation of monooxygenase activity
GO:0032774 RNA biosynthetic process	1110	8.58	Biological Process	GO:0032774	RNA biosynthetic process
GO:0032780 negative regulation of ATPase activity	1	0.008	Biological Process	GO:0032780	negative regulation of ATPase activity
GO:0032784 regulation of DNA-templated transcription, elongation	6	0.046	Biological Process	GO:0032784	regulation of DNA-templated transcription, elongation
GO:0032786 positive regulation of DNA-templated transcription, elongation	2	0.015	Biological Process	GO:0032786	positive regulation of DNA-templated transcription, elongation
GO:0032787 monocarboxylic acid metabolic process	175	1.353	Biological Process	GO:0032787	monocarboxylic acid metabolic process
GO:0032870 cellular response to hormone stimulus	8	0.062	Biological Process	GO:0032870	cellular response to hormone stimulus
GO:0032879 regulation of localization	9	0.07	Biological Process	GO:0032879	regulation of localization
GO:0032886 regulation of microtubule-based process	14	0.108	Biological Process	GO:0032886	regulation of microtubule-based process
GO:0032940 secretion by cell	33	0.255	Biological Process	GO:0032940	secretion by cell
GO:0032954 regulation of cytokinetic process	1	0.008	Biological Process	GO:0032954	regulation of cytokinetic process
GO:0032955 regulation of barrier septum assembly	1	0.008	Biological Process	GO:0032955	regulation of barrier septum assembly
GO:0032956 regulation of actin cytoskeleton organization	13	0.1	Biological Process	GO:0032956	regulation of actin cytoskeleton organization
GO:0032957 inositol trisphosphate metabolic process	5	0.039	Biological Process	GO:0032957	inositol trisphosphate metabolic process
GO:0032958 inositol phosphate biosynthetic process	1	0.008	Biological Process	GO:0032958	inositol phosphate biosynthetic process
GO:0032968 positive regulation of transcription elongation from RNA polymerase II promoter	1	0.008	Biological Process	GO:0032968	positive regulation of transcription elongation from RNA polymerase II promoter
GO:0032970 regulation of actin filament-based process	13	0.1	Biological Process	GO:0032970	regulation of actin filament-based process
GO:0032984 macromolecular complex disassembly	31	0.24	Biological Process	GO:0032984	macromolecular complex disassembly
GO:0032988 ribonucleoprotein complex disassembly	1	0.008	Biological Process	GO:0032988	ribonucleoprotein complex disassembly
GO:0033013 tetrapyrrole metabolic process	26	0.201	Biological Process	GO:0033013	tetrapyrrole metabolic process
GO:0033014 tetrapyrrole biosynthetic process	20	0.155	Biological Process	GO:0033014	tetrapyrrole biosynthetic process
GO:0033015 tetrapyrrole catabolic process	6	0.046	Biological Process	GO:0033015	tetrapyrrole catabolic process
GO:0033036 macromolecule localization	307	2.373	Biological Process	GO:0033036	macromolecule localization
GO:0033043 regulation of organelle organization	53	0.41	Biological Process	GO:0033043	regulation of organelle organization
GO:0033044 regulation of chromosome organization	26	0.201	Biological Process	GO:0033044	regulation of chromosome organization
GO:0033045 regulation of sister chromatid segregation	26	0.201	Biological Process	GO:0033045	regulation of sister chromatid segregation
GO:0033046 negative regulation of sister chromatid segregation	6	0.046	Biological Process	GO:0033046	negative regulation of sister chromatid segregation
GO:0033047 regulation of mitotic sister chromatid segregation	26	0.201	Biological Process	GO:0033047	regulation of mitotic sister chromatid segregation
GO:0033048 negative regulation of mitotic sister chromatid segregation	6	0.046	Biological Process	GO:0033048	negative regulation of mitotic sister chromatid segregation
GO:0033108 mitochondrial respiratory chain complex assembly	8	0.062	Biological Process	GO:0033108	mitochondrial respiratory chain complex assembly
GO:0033314 mitotic DNA replication checkpoint	1	0.008	Biological Process	GO:0033314	mitotic DNA replication checkpoint
GO:0033365 protein localization to organelle	44	0.34	Biological Process	GO:0033365	protein localization to organelle
GO:0033500 carbohydrate homeostasis	6	0.046	Biological Process	GO:0033500	carbohydrate homeostasis
GO:0033517 myo-inositol hexakisphosphate metabolic process	1	0.008	Biological Process	GO:0033517	myo-inositol hexakisphosphate metabolic process
GO:0033554 cellular response to stress	177	1.368	Biological Process	GO:0033554	cellular response to stress
GO:0033559 unsaturated fatty acid metabolic process	2	0.015	Biological Process	GO:0033559	unsaturated fatty acid metabolic process
GO:0033567 DNA replication, Okazaki fragment processing	1	0.008	Biological Process	GO:0033567	DNA replication, Okazaki fragment processing
GO:0033674 positive regulation of kinase activity	6	0.046	Biological Process	GO:0033674	positive regulation of kinase activity
GO:0033692 cellular polysaccharide biosynthetic process	99	0.765	Biological Process	GO:0033692	cellular polysaccharide biosynthetic process
GO:0033865 nucleoside bisphosphate metabolic process	16	0.124	Biological Process	GO:0033865	nucleoside bisphosphate metabolic process
GO:0033866 nucleoside bisphosphate biosynthetic process	4	0.031	Biological Process	GO:0033866	nucleoside bisphosphate biosynthetic process
GO:0033875 ribonucleoside bisphosphate metabolic process	16	0.124	Biological Process	GO:0033875	ribonucleoside bisphosphate metabolic process
GO:0033993 response to lipid	7	0.054	Biological Process	GO:0033993	response to lipid
GO:0034030 ribonucleoside bisphosphate biosynthetic process	4	0.031	Biological Process	GO:0034030	ribonucleoside bisphosphate biosynthetic process
GO:0034032 purine nucleoside bisphosphate metabolic process	16	0.124	Biological Process	GO:0034032	purine nucleoside bisphosphate metabolic process
GO:0034033 purine nucleoside bisphosphate biosynthetic process	4	0.031	Biological Process	GO:0034033	purine nucleoside bisphosphate biosynthetic process
GO:0034035 purine ribonucleoside bisphosphate metabolic process	5	0.039	Biological Process	GO:0034035	purine ribonucleoside bisphosphate metabolic process
GO:0034050 host programmed cell death induced by symbiont	3	0.023	Biological Process	GO:0034050	host programmed cell death induced by symbiont
GO:0034067 protein localization to Golgi apparatus	1	0.008	Biological Process	GO:0034067	protein localization to Golgi apparatus
GO:0034220 ion transmembrane transport	131	1.013	Biological Process	GO:0034220	ion transmembrane transport
GO:0034227 tRNA thio-modification	1	0.008	Biological Process	GO:0034227	tRNA thio-modification
GO:0034243 regulation of transcription elongation from RNA polymerase II promoter	1	0.008	Biological Process	GO:0034243	regulation of transcription elongation from RNA polymerase II promoter
GO:0034248 regulation of cellular amide metabolic process	6	0.046	Biological Process	GO:0034248	regulation of cellular amide metabolic process
GO:0034249 negative regulation of cellular amide metabolic process	1	0.008	Biological Process	GO:0034249	negative regulation of cellular amide metabolic process
GO:0034250 positive regulation of cellular amide metabolic process	4	0.031	Biological Process	GO:0034250	positive regulation of cellular amide metabolic process
GO:0034285 response to disaccharide	4	0.031	Biological Process	GO:0034285	response to disaccharide
GO:0034314 Arp2/3 complex-mediated actin nucleation	11	0.085	Biological Process	GO:0034314	Arp2/3 complex-mediated actin nucleation
GO:0034440 lipid oxidation	5	0.039	Biological Process	GO:0034440	lipid oxidation
GO:0034470 ncRNA processing	78	0.603	Biological Process	GO:0034470	ncRNA processing
GO:0034472 snRNA 3'-end processing	1	0.008	Biological Process	GO:0034472	snRNA 3'-end processing
GO:0034477 U6 snRNA 3'-end processing	1	0.008	Biological Process	GO:0034477	U6 snRNA 3'-end processing
GO:0034504 protein localization to nucleus	10	0.077	Biological Process	GO:0034504	protein localization to nucleus
GO:0034508 centromere complex assembly	4	0.031	Biological Process	GO:0034508	centromere complex assembly
GO:0034551 mitochondrial respiratory chain complex III assembly	8	0.062	Biological Process	GO:0034551	mitochondrial respiratory chain complex III assembly
GO:0034599 cellular response to oxidative stress	2	0.015	Biological Process	GO:0034599	cellular response to oxidative stress
GO:0034613 cellular protein localization	222	1.716	Biological Process	GO:0034613	cellular protein localization
GO:0034614 cellular response to reactive oxygen species	1	0.008	Biological Process	GO:0034614	cellular response to reactive oxygen species
GO:0034622 cellular macromolecular complex assembly	84	0.649	Biological Process	GO:0034622	cellular macromolecular complex assembly
GO:0034637 cellular carbohydrate biosynthetic process	118	0.912	Biological Process	GO:0034637	cellular carbohydrate biosynthetic process
GO:0034641 cellular nitrogen compound metabolic process	2354	18.196	Biological Process	GO:0034641	cellular nitrogen compound metabolic process
GO:0034645 cellular macromolecule biosynthetic process	1687	13.04	Biological Process	GO:0034645	cellular macromolecule biosynthetic process
GO:0034654 nucleobase-containing compound biosynthetic process	1198	9.26	Biological Process	GO:0034654	nucleobase-containing compound biosynthetic process
GO:0034655 nucleobase-containing compound catabolic process	18	0.139	Biological Process	GO:0034655	nucleobase-containing compound catabolic process
GO:0034660 ncRNA metabolic process	135	1.044	Biological Process	GO:0034660	ncRNA metabolic process
GO:0034728 nucleosome organization	24	0.186	Biological Process	GO:0034728	nucleosome organization
GO:0034754 cellular hormone metabolic process	13	0.1	Biological Process	GO:0034754	cellular hormone metabolic process
GO:0034755 iron ion transmembrane transport	5	0.039	Biological Process	GO:0034755	iron ion transmembrane transport
GO:0034968 histone lysine methylation	11	0.085	Biological Process	GO:0034968	histone lysine methylation
GO:0034976 response to endoplasmic reticulum stress	1	0.008	Biological Process	GO:0034976	response to endoplasmic reticulum stress
GO:0035194 posttranscriptional gene silencing by RNA	1	0.008	Biological Process	GO:0035194	posttranscriptional gene silencing by RNA
GO:0035246 peptidyl-arginine N-methylation	1	0.008	Biological Process	GO:0035246	peptidyl-arginine N-methylation
GO:0035303 regulation of dephosphorylation	1	0.008	Biological Process	GO:0035303	regulation of dephosphorylation
GO:0035304 regulation of protein dephosphorylation	1	0.008	Biological Process	GO:0035304	regulation of protein dephosphorylation
GO:0035383 thioester metabolic process	3	0.023	Biological Process	GO:0035383	thioester metabolic process
GO:0035384 thioester biosynthetic process	2	0.015	Biological Process	GO:0035384	thioester biosynthetic process
GO:0035434 copper ion transmembrane transport	9	0.07	Biological Process	GO:0035434	copper ion transmembrane transport
GO:0035437 maintenance of protein localization in endoplasmic reticulum	5	0.039	Biological Process	GO:0035437	maintenance of protein localization in endoplasmic reticulum
GO:0035556 intracellular signal transduction	201	1.554	Biological Process	GO:0035556	intracellular signal transduction
GO:0035601 protein deacylation	3	0.023	Biological Process	GO:0035601	protein deacylation
GO:0035825 reciprocal DNA recombination	1	0.008	Biological Process	GO:0035825	reciprocal DNA recombination
GO:0036092 phosphatidylinositol-3-phosphate biosynthetic process	2	0.015	Biological Process	GO:0036092	phosphatidylinositol-3-phosphate biosynthetic process
GO:0036211 protein modification process	2319	17.925	Biological Process	GO:0036211	protein modification process
GO:0036260 RNA capping	4	0.031	Biological Process	GO:0036260	RNA capping
GO:0036503 ERAD pathway	1	0.008	Biological Process	GO:0036503	ERAD pathway
GO:0040007 growth	19	0.147	Biological Process	GO:0040007	growth
GO:0040011 locomotion	1	0.008	Biological Process	GO:0040011	locomotion
GO:0040012 regulation of locomotion	1	0.008	Biological Process	GO:0040012	regulation of locomotion
GO:0040029 regulation of gene expression, epigenetic	3	0.023	Biological Process	GO:0040029	regulation of gene expression, epigenetic
GO:0042126 nitrate metabolic process	3	0.023	Biological Process	GO:0042126	nitrate metabolic process
GO:0042127 regulation of cell proliferation	1	0.008	Biological Process	GO:0042127	regulation of cell proliferation
GO:0042128 nitrate assimilation	3	0.023	Biological Process	GO:0042128	nitrate assimilation
GO:0042147 retrograde transport, endosome to Golgi	4	0.031	Biological Process	GO:0042147	retrograde transport, endosome to Golgi
GO:0042157 lipoprotein metabolic process	17	0.131	Biological Process	GO:0042157	lipoprotein metabolic process
GO:0042158 lipoprotein biosynthetic process	17	0.131	Biological Process	GO:0042158	lipoprotein biosynthetic process
GO:0042168 heme metabolic process	6	0.046	Biological Process	GO:0042168	heme metabolic process
GO:0042176 regulation of protein catabolic process	9	0.07	Biological Process	GO:0042176	regulation of protein catabolic process
GO:0042177 negative regulation of protein catabolic process	6	0.046	Biological Process	GO:0042177	negative regulation of protein catabolic process
GO:0042180 cellular ketone metabolic process	5	0.039	Biological Process	GO:0042180	cellular ketone metabolic process
GO:0042181 ketone biosynthetic process	1	0.008	Biological Process	GO:0042181	ketone biosynthetic process
GO:0042182 ketone catabolic process	1	0.008	Biological Process	GO:0042182	ketone catabolic process
GO:0042219 cellular modified amino acid catabolic process	2	0.015	Biological Process	GO:0042219	cellular modified amino acid catabolic process
GO:0042221 response to chemical	258	1.994	Biological Process	GO:0042221	response to chemical
GO:0042254 ribosome biogenesis	53	0.41	Biological Process	GO:0042254	ribosome biogenesis
GO:0042255 ribosome assembly	7	0.054	Biological Process	GO:0042255	ribosome assembly
GO:0042256 mature ribosome assembly	2	0.015	Biological Process	GO:0042256	mature ribosome assembly
GO:0042273 ribosomal large subunit biogenesis	2	0.015	Biological Process	GO:0042273	ribosomal large subunit biogenesis
GO:0042274 ribosomal small subunit biogenesis	2	0.015	Biological Process	GO:0042274	ribosomal small subunit biogenesis
GO:0042276 error-prone translesion synthesis	1	0.008	Biological Process	GO:0042276	error-prone translesion synthesis
GO:0042278 purine nucleoside metabolic process	118	0.912	Biological Process	GO:0042278	purine nucleoside metabolic process
GO:0042325 regulation of phosphorylation	12	0.093	Biological Process	GO:0042325	regulation of phosphorylation
GO:0042327 positive regulation of phosphorylation	6	0.046	Biological Process	GO:0042327	positive regulation of phosphorylation
GO:0042357 thiamine diphosphate metabolic process	1	0.008	Biological Process	GO:0042357	thiamine diphosphate metabolic process
GO:0042360 vitamin E metabolic process	1	0.008	Biological Process	GO:0042360	vitamin E metabolic process
GO:0042362 fat-soluble vitamin biosynthetic process	1	0.008	Biological Process	GO:0042362	fat-soluble vitamin biosynthetic process
GO:0042364 water-soluble vitamin biosynthetic process	22	0.17	Biological Process	GO:0042364	water-soluble vitamin biosynthetic process
GO:0042398 cellular modified amino acid biosynthetic process	27	0.209	Biological Process	GO:0042398	cellular modified amino acid biosynthetic process
GO:0042401 cellular biogenic amine biosynthetic process	14	0.108	Biological Process	GO:0042401	cellular biogenic amine biosynthetic process
GO:0042402 cellular biogenic amine catabolic process	3	0.023	Biological Process	GO:0042402	cellular biogenic amine catabolic process
GO:0042430 indole-containing compound metabolic process	13	0.1	Biological Process	GO:0042430	indole-containing compound metabolic process
GO:0042435 indole-containing compound biosynthetic process	5	0.039	Biological Process	GO:0042435	indole-containing compound biosynthetic process
GO:0042436 indole-containing compound catabolic process	3	0.023	Biological Process	GO:0042436	indole-containing compound catabolic process
GO:0042439 ethanolamine-containing compound metabolic process	10	0.077	Biological Process	GO:0042439	ethanolamine-containing compound metabolic process
GO:0042440 pigment metabolic process	15	0.116	Biological Process	GO:0042440	pigment metabolic process
GO:0042445 hormone metabolic process	13	0.1	Biological Process	GO:0042445	hormone metabolic process
GO:0042450 arginine biosynthetic process via ornithine	1	0.008	Biological Process	GO:0042450	arginine biosynthetic process via ornithine
GO:0042451 purine nucleoside biosynthetic process	36	0.278	Biological Process	GO:0042451	purine nucleoside biosynthetic process
GO:0042455 ribonucleoside biosynthetic process	42	0.325	Biological Process	GO:0042455	ribonucleoside biosynthetic process
GO:0042493 response to drug	85	0.657	Biological Process	GO:0042493	response to drug
GO:0042537 benzene-containing compound metabolic process	3	0.023	Biological Process	GO:0042537	benzene-containing compound metabolic process
GO:0042545 cell wall modification	79	0.611	Biological Process	GO:0042545	cell wall modification
GO:0042546 cell wall biogenesis	57	0.441	Biological Process	GO:0042546	cell wall biogenesis
GO:0042548 regulation of photosynthesis, light reaction	2	0.015	Biological Process	GO:0042548	regulation of photosynthesis, light reaction
GO:0042549 photosystem II stabilization	2	0.015	Biological Process	GO:0042549	photosystem II stabilization
GO:0042558 pteridine-containing compound metabolic process	22	0.17	Biological Process	GO:0042558	pteridine-containing compound metabolic process
GO:0042559 pteridine-containing compound biosynthetic process	19	0.147	Biological Process	GO:0042559	pteridine-containing compound biosynthetic process
GO:0042592 homeostatic process	130	1.005	Biological Process	GO:0042592	homeostatic process
GO:0042593 glucose homeostasis	6	0.046	Biological Process	GO:0042593	glucose homeostasis
GO:0042594 response to starvation	4	0.031	Biological Process	GO:0042594	response to starvation
GO:0042723 thiamine-containing compound metabolic process	3	0.023	Biological Process	GO:0042723	thiamine-containing compound metabolic process
GO:0042724 thiamine-containing compound biosynthetic process	3	0.023	Biological Process	GO:0042724	thiamine-containing compound biosynthetic process
GO:0042726 flavin-containing compound metabolic process	11	0.085	Biological Process	GO:0042726	flavin-containing compound metabolic process
GO:0042727 flavin-containing compound biosynthetic process	11	0.085	Biological Process	GO:0042727	flavin-containing compound biosynthetic process
GO:0042742 defense response to bacterium	8	0.062	Biological Process	GO:0042742	defense response to bacterium
GO:0042761 very long-chain fatty acid biosynthetic process	1	0.008	Biological Process	GO:0042761	very long-chain fatty acid biosynthetic process
GO:0042773 ATP synthesis coupled electron transport	5	0.039	Biological Process	GO:0042773	ATP synthesis coupled electron transport
GO:0042775 mitochondrial ATP synthesis coupled electron transport	3	0.023	Biological Process	GO:0042775	mitochondrial ATP synthesis coupled electron transport
GO:0042816 vitamin B6 metabolic process	4	0.031	Biological Process	GO:0042816	vitamin B6 metabolic process
GO:0042819 vitamin B6 biosynthetic process	4	0.031	Biological Process	GO:0042819	vitamin B6 biosynthetic process
GO:0042822 pyridoxal phosphate metabolic process	5	0.039	Biological Process	GO:0042822	pyridoxal phosphate metabolic process
GO:0042823 pyridoxal phosphate biosynthetic process	5	0.039	Biological Process	GO:0042823	pyridoxal phosphate biosynthetic process
GO:0042886 amide transport	21	0.162	Biological Process	GO:0042886	amide transport
GO:0043038 amino acid activation	58	0.448	Biological Process	GO:0043038	amino acid activation
GO:0043039 tRNA aminoacylation	58	0.448	Biological Process	GO:0043039	tRNA aminoacylation
GO:0043043 peptide biosynthetic process	363	2.806	Biological Process	GO:0043043	peptide biosynthetic process
GO:0043044 ATP-dependent chromatin remodeling	3	0.023	Biological Process	GO:0043044	ATP-dependent chromatin remodeling
GO:0043062 extracellular structure organization	16	0.124	Biological Process	GO:0043062	extracellular structure organization
GO:0043085 positive regulation of catalytic activity	10	0.077	Biological Process	GO:0043085	positive regulation of catalytic activity
GO:0043086 negative regulation of catalytic activity	7	0.054	Biological Process	GO:0043086	negative regulation of catalytic activity
GO:0043087 regulation of GTPase activity	1	0.008	Biological Process	GO:0043087	regulation of GTPase activity
GO:0043094 cellular metabolic compound salvage	8	0.062	Biological Process	GO:0043094	cellular metabolic compound salvage
GO:0043097 pyrimidine nucleoside salvage	4	0.031	Biological Process	GO:0043097	pyrimidine nucleoside salvage
GO:0043101 purine-containing compound salvage	2	0.015	Biological Process	GO:0043101	purine-containing compound salvage
GO:0043102 amino acid salvage	1	0.008	Biological Process	GO:0043102	amino acid salvage
GO:0043161 proteasome-mediated ubiquitin-dependent protein catabolic process	27	0.209	Biological Process	GO:0043161	proteasome-mediated ubiquitin-dependent protein catabolic process
GO:0043170 macromolecule metabolic process	5087	39.321	Biological Process	GO:0043170	macromolecule metabolic process
GO:0043173 nucleotide salvage	5	0.039	Biological Process	GO:0043173	nucleotide salvage
GO:0043174 nucleoside salvage	5	0.039	Biological Process	GO:0043174	nucleoside salvage
GO:0043207 response to external biotic stimulus	12	0.093	Biological Process	GO:0043207	response to external biotic stimulus
GO:0043241 protein complex disassembly	30	0.232	Biological Process	GO:0043241	protein complex disassembly
GO:0043242 negative regulation of protein complex disassembly	2	0.015	Biological Process	GO:0043242	negative regulation of protein complex disassembly
GO:0043243 positive regulation of protein complex disassembly	4	0.031	Biological Process	GO:0043243	positive regulation of protein complex disassembly
GO:0043244 regulation of protein complex disassembly	6	0.046	Biological Process	GO:0043244	regulation of protein complex disassembly
GO:0043248 proteasome assembly	5	0.039	Biological Process	GO:0043248	proteasome assembly
GO:0043254 regulation of protein complex assembly	20	0.155	Biological Process	GO:0043254	regulation of protein complex assembly
GO:0043269 regulation of ion transport	8	0.062	Biological Process	GO:0043269	regulation of ion transport
GO:0043288 apocarotenoid metabolic process	2	0.015	Biological Process	GO:0043288	apocarotenoid metabolic process
GO:0043289 apocarotenoid biosynthetic process	2	0.015	Biological Process	GO:0043289	apocarotenoid biosynthetic process
GO:0043401 steroid hormone mediated signaling pathway	3	0.023	Biological Process	GO:0043401	steroid hormone mediated signaling pathway
GO:0043412 macromolecule modification	2383	18.42	Biological Process	GO:0043412	macromolecule modification
GO:0043413 macromolecule glycosylation	49	0.379	Biological Process	GO:0043413	macromolecule glycosylation
GO:0043414 macromolecule methylation	37	0.286	Biological Process	GO:0043414	macromolecule methylation
GO:0043419 urea catabolic process	1	0.008	Biological Process	GO:0043419	urea catabolic process
GO:0043436 oxoacid metabolic process	465	3.594	Biological Process	GO:0043436	oxoacid metabolic process
GO:0043461 proton-transporting ATP synthase complex assembly	1	0.008	Biological Process	GO:0043461	proton-transporting ATP synthase complex assembly
GO:0043462 regulation of ATPase activity	1	0.008	Biological Process	GO:0043462	regulation of ATPase activity
GO:0043467 regulation of generation of precursor metabolites and energy	2	0.015	Biological Process	GO:0043467	regulation of generation of precursor metabolites and energy
GO:0043484 regulation of RNA splicing	2	0.015	Biological Process	GO:0043484	regulation of RNA splicing
GO:0043486 histone exchange	1	0.008	Biological Process	GO:0043486	histone exchange
GO:0043543 protein acylation	13	0.1	Biological Process	GO:0043543	protein acylation
GO:0043545 molybdopterin cofactor metabolic process	4	0.031	Biological Process	GO:0043545	molybdopterin cofactor metabolic process
GO:0043549 regulation of kinase activity	12	0.093	Biological Process	GO:0043549	regulation of kinase activity
GO:0043550 regulation of lipid kinase activity	1	0.008	Biological Process	GO:0043550	regulation of lipid kinase activity
GO:0043562 cellular response to nitrogen levels	4	0.031	Biological Process	GO:0043562	cellular response to nitrogen levels
GO:0043574 peroxisomal transport	5	0.039	Biological Process	GO:0043574	peroxisomal transport
GO:0043603 cellular amide metabolic process	401	3.1	Biological Process	GO:0043603	cellular amide metabolic process
GO:0043604 amide biosynthetic process	385	2.976	Biological Process	GO:0043604	amide biosynthetic process
GO:0043605 cellular amide catabolic process	1	0.008	Biological Process	GO:0043605	cellular amide catabolic process
GO:0043623 cellular protein complex assembly	46	0.356	Biological Process	GO:0043623	cellular protein complex assembly
GO:0043624 cellular protein complex disassembly	30	0.232	Biological Process	GO:0043624	cellular protein complex disassembly
GO:0043628 ncRNA 3'-end processing	1	0.008	Biological Process	GO:0043628	ncRNA 3'-end processing
GO:0043631 RNA polyadenylation	5	0.039	Biological Process	GO:0043631	RNA polyadenylation
GO:0043632 modification-dependent macromolecule catabolic process	114	0.881	Biological Process	GO:0043632	modification-dependent macromolecule catabolic process
GO:0043647 inositol phosphate metabolic process	6	0.046	Biological Process	GO:0043647	inositol phosphate metabolic process
GO:0043648 dicarboxylic acid metabolic process	25	0.193	Biological Process	GO:0043648	dicarboxylic acid metabolic process
GO:0043650 dicarboxylic acid biosynthetic process	2	0.015	Biological Process	GO:0043650	dicarboxylic acid biosynthetic process
GO:0043666 regulation of phosphoprotein phosphatase activity	1	0.008	Biological Process	GO:0043666	regulation of phosphoprotein phosphatase activity
GO:0043687 post-translational protein modification	2	0.015	Biological Process	GO:0043687	post-translational protein modification
GO:0043900 regulation of multi-organism process	4	0.031	Biological Process	GO:0043900	regulation of multi-organism process
GO:0043933 macromolecular complex subunit organization	201	1.554	Biological Process	GO:0043933	macromolecular complex subunit organization
GO:0043967 histone H4 acetylation	1	0.008	Biological Process	GO:0043967	histone H4 acetylation
GO:0043968 histone H2A acetylation	1	0.008	Biological Process	GO:0043968	histone H2A acetylation
GO:0044030 regulation of DNA methylation	1	0.008	Biological Process	GO:0044030	regulation of DNA methylation
GO:0044036 cell wall macromolecule metabolic process	62	0.479	Biological Process	GO:0044036	cell wall macromolecule metabolic process
GO:0044038 cell wall macromolecule biosynthetic process	4	0.031	Biological Process	GO:0044038	cell wall macromolecule biosynthetic process
GO:0044042 glucan metabolic process	137	1.059	Biological Process	GO:0044042	glucan metabolic process
GO:0044070 regulation of anion transport	4	0.031	Biological Process	GO:0044070	regulation of anion transport
GO:0044085 cellular component biogenesis	215	1.662	Biological Process	GO:0044085	cellular component biogenesis
GO:0044087 regulation of cellular component biogenesis	21	0.162	Biological Process	GO:0044087	regulation of cellular component biogenesis
GO:0044089 positive regulation of cellular component biogenesis	18	0.139	Biological Process	GO:0044089	positive regulation of cellular component biogenesis
GO:0044092 negative regulation of molecular function	7	0.054	Biological Process	GO:0044092	negative regulation of molecular function
GO:0044093 positive regulation of molecular function	10	0.077	Biological Process	GO:0044093	positive regulation of molecular function
GO:0044106 cellular amine metabolic process	34	0.263	Biological Process	GO:0044106	cellular amine metabolic process
GO:0044206 UMP salvage	4	0.031	Biological Process	GO:0044206	UMP salvage
GO:0044237 cellular metabolic process	5539	42.815	Biological Process	GO:0044237	cellular metabolic process
GO:0044238 primary metabolic process	6455	49.896	Biological Process	GO:0044238	primary metabolic process
GO:0044242 cellular lipid catabolic process	8	0.062	Biological Process	GO:0044242	cellular lipid catabolic process
GO:0044247 cellular polysaccharide catabolic process	1	0.008	Biological Process	GO:0044247	cellular polysaccharide catabolic process
GO:0044248 cellular catabolic process	204	1.577	Biological Process	GO:0044248	cellular catabolic process
GO:0044249 cellular biosynthetic process	2133	16.488	Biological Process	GO:0044249	cellular biosynthetic process
GO:0044255 cellular lipid metabolic process	263	2.033	Biological Process	GO:0044255	cellular lipid metabolic process
GO:0044257 cellular protein catabolic process	126	0.974	Biological Process	GO:0044257	cellular protein catabolic process
GO:0044260 cellular macromolecule metabolic process	4518	34.923	Biological Process	GO:0044260	cellular macromolecule metabolic process
GO:0044262 cellular carbohydrate metabolic process	210	1.623	Biological Process	GO:0044262	cellular carbohydrate metabolic process
GO:0044264 cellular polysaccharide metabolic process	141	1.09	Biological Process	GO:0044264	cellular polysaccharide metabolic process
GO:0044265 cellular macromolecule catabolic process	143	1.105	Biological Process	GO:0044265	cellular macromolecule catabolic process
GO:0044267 cellular protein metabolic process	2777	21.466	Biological Process	GO:0044267	cellular protein metabolic process
GO:0044270 cellular nitrogen compound catabolic process	28	0.216	Biological Process	GO:0044270	cellular nitrogen compound catabolic process
GO:0044271 cellular nitrogen compound biosynthetic process	1644	12.708	Biological Process	GO:0044271	cellular nitrogen compound biosynthetic process
GO:0044272 sulfur compound biosynthetic process	52	0.402	Biological Process	GO:0044272	sulfur compound biosynthetic process
GO:0044273 sulfur compound catabolic process	2	0.015	Biological Process	GO:0044273	sulfur compound catabolic process
GO:0044275 cellular carbohydrate catabolic process	4	0.031	Biological Process	GO:0044275	cellular carbohydrate catabolic process
GO:0044281 small molecule metabolic process	750	5.797	Biological Process	GO:0044281	small molecule metabolic process
GO:0044282 small molecule catabolic process	28	0.216	Biological Process	GO:0044282	small molecule catabolic process
GO:0044283 small molecule biosynthetic process	244	1.886	Biological Process	GO:0044283	small molecule biosynthetic process
GO:0044550 secondary metabolite biosynthetic process	5	0.039	Biological Process	GO:0044550	secondary metabolite biosynthetic process
GO:0044699 single-organism process	6043	46.711	Biological Process	GO:0044699	single-organism process
GO:0044700 single organism signaling	1127	8.711	Biological Process	GO:0044700	single organism signaling
GO:0044702 single organism reproductive process	184	1.422	Biological Process	GO:0044702	single organism reproductive process
GO:0044703 multi-organism reproductive process	179	1.384	Biological Process	GO:0044703	multi-organism reproductive process
GO:0044706 multi-multicellular organism process	178	1.376	Biological Process	GO:0044706	multi-multicellular organism process
GO:0044707 single-multicellular organism process	51	0.394	Biological Process	GO:0044707	single-multicellular organism process
GO:0044710 single-organism metabolic process	3166	24.472	Biological Process	GO:0044710	single-organism metabolic process
GO:0044711 single-organism biosynthetic process	564	4.36	Biological Process	GO:0044711	single-organism biosynthetic process
GO:0044712 single-organism catabolic process	108	0.835	Biological Process	GO:0044712	single-organism catabolic process
GO:0044723 single-organism carbohydrate metabolic process	311	2.404	Biological Process	GO:0044723	single-organism carbohydrate metabolic process
GO:0044724 single-organism carbohydrate catabolic process	63	0.487	Biological Process	GO:0044724	single-organism carbohydrate catabolic process
GO:0044728 DNA methylation or demethylation	4	0.031	Biological Process	GO:0044728	DNA methylation or demethylation
GO:0044743 intracellular protein transmembrane import	11	0.085	Biological Process	GO:0044743	intracellular protein transmembrane import
GO:0044744 protein targeting to nucleus	10	0.077	Biological Process	GO:0044744	protein targeting to nucleus
GO:0044763 single-organism cellular process	3820	29.528	Biological Process	GO:0044763	single-organism cellular process
GO:0044765 single-organism transport	1180	9.121	Biological Process	GO:0044765	single-organism transport
GO:0044767 single-organism developmental process	51	0.394	Biological Process	GO:0044767	single-organism developmental process
GO:0044770 cell cycle phase transition	27	0.209	Biological Process	GO:0044770	cell cycle phase transition
GO:0044772 mitotic cell cycle phase transition	27	0.209	Biological Process	GO:0044772	mitotic cell cycle phase transition
GO:0044774 mitotic DNA integrity checkpoint	1	0.008	Biological Process	GO:0044774	mitotic DNA integrity checkpoint
GO:0044784 metaphase/anaphase transition of cell cycle	26	0.201	Biological Process	GO:0044784	metaphase/anaphase transition of cell cycle
GO:0044801 single-organism membrane fusion	1	0.008	Biological Process	GO:0044801	single-organism membrane fusion
GO:0044802 single-organism membrane organization	26	0.201	Biological Process	GO:0044802	single-organism membrane organization
GO:0044818 mitotic G2/M transition checkpoint	1	0.008	Biological Process	GO:0044818	mitotic G2/M transition checkpoint
GO:0044839 cell cycle G2/M phase transition	1	0.008	Biological Process	GO:0044839	cell cycle G2/M phase transition
GO:0044848 biological phase	1	0.008	Biological Process	GO:0044848	biological phase
GO:0045005 DNA-dependent DNA replication maintenance of fidelity	1	0.008	Biological Process	GO:0045005	DNA-dependent DNA replication maintenance of fidelity
GO:0045010 actin nucleation	11	0.085	Biological Process	GO:0045010	actin nucleation
GO:0045017 glycerolipid biosynthetic process	34	0.263	Biological Process	GO:0045017	glycerolipid biosynthetic process
GO:0045036 protein targeting to chloroplast	1	0.008	Biological Process	GO:0045036	protein targeting to chloroplast
GO:0045038 protein import into chloroplast thylakoid membrane	1	0.008	Biological Process	GO:0045038	protein import into chloroplast thylakoid membrane
GO:0045039 protein import into mitochondrial inner membrane	1	0.008	Biological Process	GO:0045039	protein import into mitochondrial inner membrane
GO:0045040 protein import into mitochondrial outer membrane	2	0.015	Biological Process	GO:0045040	protein import into mitochondrial outer membrane
GO:0045047 protein targeting to ER	13	0.1	Biological Process	GO:0045047	protein targeting to ER
GO:0045048 protein insertion into ER membrane	1	0.008	Biological Process	GO:0045048	protein insertion into ER membrane
GO:0045087 innate immune response	9	0.07	Biological Process	GO:0045087	innate immune response
GO:0045088 regulation of innate immune response	6	0.046	Biological Process	GO:0045088	regulation of innate immune response
GO:0045089 positive regulation of innate immune response	2	0.015	Biological Process	GO:0045089	positive regulation of innate immune response
GO:0045116 protein neddylation	2	0.015	Biological Process	GO:0045116	protein neddylation
GO:0045132 meiotic chromosome segregation	1	0.008	Biological Process	GO:0045132	meiotic chromosome segregation
GO:0045184 establishment of protein localization	272	2.102	Biological Process	GO:0045184	establishment of protein localization
GO:0045185 maintenance of protein location	6	0.046	Biological Process	GO:0045185	maintenance of protein location
GO:0045229 external encapsulating structure organization	98	0.758	Biological Process	GO:0045229	external encapsulating structure organization
GO:0045292 mRNA cis splicing, via spliceosome	2	0.015	Biological Process	GO:0045292	mRNA cis splicing, via spliceosome
GO:0045333 cellular respiration	15	0.116	Biological Process	GO:0045333	cellular respiration
GO:0045454 cell redox homeostasis	106	0.819	Biological Process	GO:0045454	cell redox homeostasis
GO:0045491 xylan metabolic process	4	0.031	Biological Process	GO:0045491	xylan metabolic process
GO:0045492 xylan biosynthetic process	4	0.031	Biological Process	GO:0045492	xylan biosynthetic process
GO:0045727 positive regulation of translation	4	0.031	Biological Process	GO:0045727	positive regulation of translation
GO:0045739 positive regulation of DNA repair	1	0.008	Biological Process	GO:0045739	positive regulation of DNA repair
GO:0045747 positive regulation of Notch signaling pathway	1	0.008	Biological Process	GO:0045747	positive regulation of Notch signaling pathway
GO:0045786 negative regulation of cell cycle	15	0.116	Biological Process	GO:0045786	negative regulation of cell cycle
GO:0045814 negative regulation of gene expression, epigenetic	1	0.008	Biological Process	GO:0045814	negative regulation of gene expression, epigenetic
GO:0045839 negative regulation of mitotic nuclear division	6	0.046	Biological Process	GO:0045839	negative regulation of mitotic nuclear division
GO:0045841 negative regulation of mitotic metaphase/anaphase transition	6	0.046	Biological Process	GO:0045841	negative regulation of mitotic metaphase/anaphase transition
GO:0045859 regulation of protein kinase activity	11	0.085	Biological Process	GO:0045859	regulation of protein kinase activity
GO:0045860 positive regulation of protein kinase activity	6	0.046	Biological Process	GO:0045860	positive regulation of protein kinase activity
GO:0045861 negative regulation of proteolysis	6	0.046	Biological Process	GO:0045861	negative regulation of proteolysis
GO:0045892 negative regulation of transcription, DNA-templated	3	0.023	Biological Process	GO:0045892	negative regulation of transcription, DNA-templated
GO:0045893 positive regulation of transcription, DNA-templated	11	0.085	Biological Process	GO:0045893	positive regulation of transcription, DNA-templated
GO:0045900 negative regulation of translational elongation	1	0.008	Biological Process	GO:0045900	negative regulation of translational elongation
GO:0045901 positive regulation of translational elongation	4	0.031	Biological Process	GO:0045901	positive regulation of translational elongation
GO:0045905 positive regulation of translational termination	4	0.031	Biological Process	GO:0045905	positive regulation of translational termination
GO:0045910 negative regulation of DNA recombination	2	0.015	Biological Process	GO:0045910	negative regulation of DNA recombination
GO:0045930 negative regulation of mitotic cell cycle	8	0.062	Biological Process	GO:0045930	negative regulation of mitotic cell cycle
GO:0045934 negative regulation of nucleobase-containing compound metabolic process	6	0.046	Biological Process	GO:0045934	negative regulation of nucleobase-containing compound metabolic process
GO:0045935 positive regulation of nucleobase-containing compound metabolic process	12	0.093	Biological Process	GO:0045935	positive regulation of nucleobase-containing compound metabolic process
GO:0045937 positive regulation of phosphate metabolic process	6	0.046	Biological Process	GO:0045937	positive regulation of phosphate metabolic process
GO:0045944 positive regulation of transcription from RNA polymerase II promoter	1	0.008	Biological Process	GO:0045944	positive regulation of transcription from RNA polymerase II promoter
GO:0046031 ADP metabolic process	58	0.448	Biological Process	GO:0046031	ADP metabolic process
GO:0046034 ATP metabolic process	91	0.703	Biological Process	GO:0046034	ATP metabolic process
GO:0046036 CTP metabolic process	5	0.039	Biological Process	GO:0046036	CTP metabolic process
GO:0046037 GMP metabolic process	1	0.008	Biological Process	GO:0046037	GMP metabolic process
GO:0046039 GTP metabolic process	5	0.039	Biological Process	GO:0046039	GTP metabolic process
GO:0046040 IMP metabolic process	4	0.031	Biological Process	GO:0046040	IMP metabolic process
GO:0046049 UMP metabolic process	4	0.031	Biological Process	GO:0046049	UMP metabolic process
GO:0046051 UTP metabolic process	5	0.039	Biological Process	GO:0046051	UTP metabolic process
GO:0046072 dTDP metabolic process	1	0.008	Biological Process	GO:0046072	dTDP metabolic process
GO:0046073 dTMP metabolic process	4	0.031	Biological Process	GO:0046073	dTMP metabolic process
GO:0046080 dUTP metabolic process	2	0.015	Biological Process	GO:0046080	dUTP metabolic process
GO:0046112 nucleobase biosynthetic process	4	0.031	Biological Process	GO:0046112	nucleobase biosynthetic process
GO:0046116 queuosine metabolic process	2	0.015	Biological Process	GO:0046116	queuosine metabolic process
GO:0046128 purine ribonucleoside metabolic process	118	0.912	Biological Process	GO:0046128	purine ribonucleoside metabolic process
GO:0046129 purine ribonucleoside biosynthetic process	36	0.278	Biological Process	GO:0046129	purine ribonucleoside biosynthetic process
GO:0046131 pyrimidine ribonucleoside metabolic process	9	0.07	Biological Process	GO:0046131	pyrimidine ribonucleoside metabolic process
GO:0046132 pyrimidine ribonucleoside biosynthetic process	9	0.07	Biological Process	GO:0046132	pyrimidine ribonucleoside biosynthetic process
GO:0046134 pyrimidine nucleoside biosynthetic process	9	0.07	Biological Process	GO:0046134	pyrimidine nucleoside biosynthetic process
GO:0046146 tetrahydrobiopterin metabolic process	3	0.023	Biological Process	GO:0046146	tetrahydrobiopterin metabolic process
GO:0046148 pigment biosynthetic process	9	0.07	Biological Process	GO:0046148	pigment biosynthetic process
GO:0046149 pigment catabolic process	3	0.023	Biological Process	GO:0046149	pigment catabolic process
GO:0046160 heme a metabolic process	1	0.008	Biological Process	GO:0046160	heme a metabolic process
GO:0046164 alcohol catabolic process	3	0.023	Biological Process	GO:0046164	alcohol catabolic process
GO:0046165 alcohol biosynthetic process	5	0.039	Biological Process	GO:0046165	alcohol biosynthetic process
GO:0046168 glycerol-3-phosphate catabolic process	4	0.031	Biological Process	GO:0046168	glycerol-3-phosphate catabolic process
GO:0046173 polyol biosynthetic process	2	0.015	Biological Process	GO:0046173	polyol biosynthetic process
GO:0046174 polyol catabolic process	3	0.023	Biological Process	GO:0046174	polyol catabolic process
GO:0046184 aldehyde biosynthetic process	5	0.039	Biological Process	GO:0046184	aldehyde biosynthetic process
GO:0046185 aldehyde catabolic process	2	0.015	Biological Process	GO:0046185	aldehyde catabolic process
GO:0046209 nitric oxide metabolic process	1	0.008	Biological Process	GO:0046209	nitric oxide metabolic process
GO:0046218 indolalkylamine catabolic process	3	0.023	Biological Process	GO:0046218	indolalkylamine catabolic process
GO:0046219 indolalkylamine biosynthetic process	5	0.039	Biological Process	GO:0046219	indolalkylamine biosynthetic process
GO:0046292 formaldehyde metabolic process	1	0.008	Biological Process	GO:0046292	formaldehyde metabolic process
GO:0046294 formaldehyde catabolic process	1	0.008	Biological Process	GO:0046294	formaldehyde catabolic process
GO:0046348 amino sugar catabolic process	40	0.309	Biological Process	GO:0046348	amino sugar catabolic process
GO:0046351 disaccharide biosynthetic process	18	0.139	Biological Process	GO:0046351	disaccharide biosynthetic process
GO:0046364 monosaccharide biosynthetic process	16	0.124	Biological Process	GO:0046364	monosaccharide biosynthetic process
GO:0046365 monosaccharide catabolic process	2	0.015	Biological Process	GO:0046365	monosaccharide catabolic process
GO:0046373 L-arabinose metabolic process	2	0.015	Biological Process	GO:0046373	L-arabinose metabolic process
GO:0046385 deoxyribose phosphate biosynthetic process	5	0.039	Biological Process	GO:0046385	deoxyribose phosphate biosynthetic process
GO:0046390 ribose phosphate biosynthetic process	39	0.301	Biological Process	GO:0046390	ribose phosphate biosynthetic process
GO:0046394 carboxylic acid biosynthetic process	204	1.577	Biological Process	GO:0046394	carboxylic acid biosynthetic process
GO:0046395 carboxylic acid catabolic process	20	0.155	Biological Process	GO:0046395	carboxylic acid catabolic process
GO:0046416 D-amino acid metabolic process	2	0.015	Biological Process	GO:0046416	D-amino acid metabolic process
GO:0046434 organophosphate catabolic process	5	0.039	Biological Process	GO:0046434	organophosphate catabolic process
GO:0046451 diaminopimelate metabolic process	8	0.062	Biological Process	GO:0046451	diaminopimelate metabolic process
GO:0046456 icosanoid biosynthetic process	2	0.015	Biological Process	GO:0046456	icosanoid biosynthetic process
GO:0046460 neutral lipid biosynthetic process	1	0.008	Biological Process	GO:0046460	neutral lipid biosynthetic process
GO:0046463 acylglycerol biosynthetic process	1	0.008	Biological Process	GO:0046463	acylglycerol biosynthetic process
GO:0046466 membrane lipid catabolic process	4	0.031	Biological Process	GO:0046466	membrane lipid catabolic process
GO:0046467 membrane lipid biosynthetic process	21	0.162	Biological Process	GO:0046467	membrane lipid biosynthetic process
GO:0046470 phosphatidylcholine metabolic process	10	0.077	Biological Process	GO:0046470	phosphatidylcholine metabolic process
GO:0046473 phosphatidic acid metabolic process	1	0.008	Biological Process	GO:0046473	phosphatidic acid metabolic process
GO:0046474 glycerophospholipid biosynthetic process	19	0.147	Biological Process	GO:0046474	glycerophospholipid biosynthetic process
GO:0046477 glycosylceramide catabolic process	4	0.031	Biological Process	GO:0046477	glycosylceramide catabolic process
GO:0046479 glycosphingolipid catabolic process	4	0.031	Biological Process	GO:0046479	glycosphingolipid catabolic process
GO:0046483 heterocycle metabolic process	2037	15.746	Biological Process	GO:0046483	heterocycle metabolic process
GO:0046486 glycerolipid metabolic process	90	0.696	Biological Process	GO:0046486	glycerolipid metabolic process
GO:0046487 glyoxylate metabolic process	1	0.008	Biological Process	GO:0046487	glyoxylate metabolic process
GO:0046488 phosphatidylinositol metabolic process	60	0.464	Biological Process	GO:0046488	phosphatidylinositol metabolic process
GO:0046490 isopentenyl diphosphate metabolic process	3	0.023	Biological Process	GO:0046490	isopentenyl diphosphate metabolic process
GO:0046493 lipid A metabolic process	3	0.023	Biological Process	GO:0046493	lipid A metabolic process
GO:0046496 nicotinamide nucleotide metabolic process	78	0.603	Biological Process	GO:0046496	nicotinamide nucleotide metabolic process
GO:0046500 S-adenosylmethionine metabolic process	4	0.031	Biological Process	GO:0046500	S-adenosylmethionine metabolic process
GO:0046514 ceramide catabolic process	4	0.031	Biological Process	GO:0046514	ceramide catabolic process
GO:0046578 regulation of Ras protein signal transduction	5	0.039	Biological Process	GO:0046578	regulation of Ras protein signal transduction
GO:0046653 tetrahydrofolate metabolic process	1	0.008	Biological Process	GO:0046653	tetrahydrofolate metabolic process
GO:0046654 tetrahydrofolate biosynthetic process	1	0.008	Biological Process	GO:0046654	tetrahydrofolate biosynthetic process
GO:0046700 heterocycle catabolic process	28	0.216	Biological Process	GO:0046700	heterocycle catabolic process
GO:0046785 microtubule polymerization	8	0.062	Biological Process	GO:0046785	microtubule polymerization
GO:0046834 lipid phosphorylation	18	0.139	Biological Process	GO:0046834	lipid phosphorylation
GO:0046835 carbohydrate phosphorylation	8	0.062	Biological Process	GO:0046835	carbohydrate phosphorylation
GO:0046836 glycolipid transport	6	0.046	Biological Process	GO:0046836	glycolipid transport
GO:0046839 phospholipid dephosphorylation	14	0.108	Biological Process	GO:0046839	phospholipid dephosphorylation
GO:0046854 phosphatidylinositol phosphorylation	18	0.139	Biological Process	GO:0046854	phosphatidylinositol phosphorylation
GO:0046856 phosphatidylinositol dephosphorylation	14	0.108	Biological Process	GO:0046856	phosphatidylinositol dephosphorylation
GO:0046903 secretion	33	0.255	Biological Process	GO:0046903	secretion
GO:0046907 intracellular transport	270	2.087	Biological Process	GO:0046907	intracellular transport
GO:0046916 cellular transition metal ion homeostasis	4	0.031	Biological Process	GO:0046916	cellular transition metal ion homeostasis
GO:0046937 phytochelatin metabolic process	5	0.039	Biological Process	GO:0046937	phytochelatin metabolic process
GO:0046938 phytochelatin biosynthetic process	5	0.039	Biological Process	GO:0046938	phytochelatin biosynthetic process
GO:0046939 nucleotide phosphorylation	63	0.487	Biological Process	GO:0046939	nucleotide phosphorylation
GO:0046942 carboxylic acid transport	57	0.441	Biological Process	GO:0046942	carboxylic acid transport
GO:0048015 phosphatidylinositol-mediated signaling	10	0.077	Biological Process	GO:0048015	phosphatidylinositol-mediated signaling
GO:0048017 inositol lipid-mediated signaling	11	0.085	Biological Process	GO:0048017	inositol lipid-mediated signaling
GO:0048024 regulation of mRNA splicing, via spliceosome	2	0.015	Biological Process	GO:0048024	regulation of mRNA splicing, via spliceosome
GO:0048193 Golgi vesicle transport	35	0.271	Biological Process	GO:0048193	Golgi vesicle transport
GO:0048199 vesicle targeting, to, from or within Golgi	1	0.008	Biological Process	GO:0048199	vesicle targeting, to, from or within Golgi
GO:0048207 vesicle targeting, rough ER to cis-Golgi	1	0.008	Biological Process	GO:0048207	vesicle targeting, rough ER to cis-Golgi
GO:0048208 COPII vesicle coating	1	0.008	Biological Process	GO:0048208	COPII vesicle coating
GO:0048229 gametophyte development	1	0.008	Biological Process	GO:0048229	gametophyte development
GO:0048232 male gamete generation	1	0.008	Biological Process	GO:0048232	male gamete generation
GO:0048278 vesicle docking	11	0.085	Biological Process	GO:0048278	vesicle docking
GO:0048280 vesicle fusion with Golgi apparatus	1	0.008	Biological Process	GO:0048280	vesicle fusion with Golgi apparatus
GO:0048284 organelle fusion	1	0.008	Biological Process	GO:0048284	organelle fusion
GO:0048285 organelle fission	55	0.425	Biological Process	GO:0048285	organelle fission
GO:0048366 leaf development	2	0.015	Biological Process	GO:0048366	leaf development
GO:0048367 shoot system development	7	0.054	Biological Process	GO:0048367	shoot system development
GO:0048478 replication fork protection	1	0.008	Biological Process	GO:0048478	replication fork protection
GO:0048511 rhythmic process	1	0.008	Biological Process	GO:0048511	rhythmic process
GO:0048513 animal organ development	3	0.023	Biological Process	GO:0048513	animal organ development
GO:0048518 positive regulation of biological process	49	0.379	Biological Process	GO:0048518	positive regulation of biological process
GO:0048519 negative regulation of biological process	40	0.309	Biological Process	GO:0048519	negative regulation of biological process
GO:0048522 positive regulation of cellular process	43	0.332	Biological Process	GO:0048522	positive regulation of cellular process
GO:0048523 negative regulation of cellular process	30	0.232	Biological Process	GO:0048523	negative regulation of cellular process
GO:0048544 recognition of pollen	178	1.376	Biological Process	GO:0048544	recognition of pollen
GO:0048545 response to steroid hormone	3	0.023	Biological Process	GO:0048545	response to steroid hormone
GO:0048573 photoperiodism, flowering	1	0.008	Biological Process	GO:0048573	photoperiodism, flowering
GO:0048580 regulation of post-embryonic development	2	0.015	Biological Process	GO:0048580	regulation of post-embryonic development
GO:0048582 positive regulation of post-embryonic development	1	0.008	Biological Process	GO:0048582	positive regulation of post-embryonic development
GO:0048583 regulation of response to stimulus	77	0.595	Biological Process	GO:0048583	regulation of response to stimulus
GO:0048584 positive regulation of response to stimulus	5	0.039	Biological Process	GO:0048584	positive regulation of response to stimulus
GO:0048585 negative regulation of response to stimulus	3	0.023	Biological Process	GO:0048585	negative regulation of response to stimulus
GO:0048608 reproductive structure development	2	0.015	Biological Process	GO:0048608	reproductive structure development
GO:0048609 multicellular organismal reproductive process	1	0.008	Biological Process	GO:0048609	multicellular organismal reproductive process
GO:0048646 anatomical structure formation involved in morphogenesis	4	0.031	Biological Process	GO:0048646	anatomical structure formation involved in morphogenesis
GO:0048731 system development	9	0.07	Biological Process	GO:0048731	system development
GO:0048827 phyllome development	2	0.015	Biological Process	GO:0048827	phyllome development
GO:0048831 regulation of shoot system development	1	0.008	Biological Process	GO:0048831	regulation of shoot system development
GO:0048856 anatomical structure development	14	0.108	Biological Process	GO:0048856	anatomical structure development
GO:0048869 cellular developmental process	1	0.008	Biological Process	GO:0048869	cellular developmental process
GO:0048870 cell motility	1	0.008	Biological Process	GO:0048870	cell motility
GO:0048878 chemical homeostasis	17	0.131	Biological Process	GO:0048878	chemical homeostasis
GO:0050657 nucleic acid transport	2	0.015	Biological Process	GO:0050657	nucleic acid transport
GO:0050658 RNA transport	2	0.015	Biological Process	GO:0050658	RNA transport
GO:0050684 regulation of mRNA processing	2	0.015	Biological Process	GO:0050684	regulation of mRNA processing
GO:0050764 regulation of phagocytosis	1	0.008	Biological Process	GO:0050764	regulation of phagocytosis
GO:0050776 regulation of immune response	6	0.046	Biological Process	GO:0050776	regulation of immune response
GO:0050778 positive regulation of immune response	2	0.015	Biological Process	GO:0050778	positive regulation of immune response
GO:0050789 regulation of biological process	2358	18.227	Biological Process	GO:0050789	regulation of biological process
GO:0050790 regulation of catalytic activity	27	0.209	Biological Process	GO:0050790	regulation of catalytic activity
GO:0050793 regulation of developmental process	2	0.015	Biological Process	GO:0050793	regulation of developmental process
GO:0050794 regulation of cellular process	2311	17.863	Biological Process	GO:0050794	regulation of cellular process
GO:0050801 ion homeostasis	11	0.085	Biological Process	GO:0050801	ion homeostasis
GO:0050821 protein stabilization	1	0.008	Biological Process	GO:0050821	protein stabilization
GO:0050826 response to freezing	1	0.008	Biological Process	GO:0050826	response to freezing
GO:0050832 defense response to fungus	6	0.046	Biological Process	GO:0050832	defense response to fungus
GO:0050896 response to stimulus	1991	15.39	Biological Process	GO:0050896	response to stimulus
GO:0050992 dimethylallyl diphosphate biosynthetic process	3	0.023	Biological Process	GO:0050992	dimethylallyl diphosphate biosynthetic process
GO:0050993 dimethylallyl diphosphate metabolic process	3	0.023	Biological Process	GO:0050993	dimethylallyl diphosphate metabolic process
GO:0050999 regulation of nitric-oxide synthase activity	1	0.008	Biological Process	GO:0050999	regulation of nitric-oxide synthase activity
GO:0051013 microtubule severing	1	0.008	Biological Process	GO:0051013	microtubule severing
GO:0051016 barbed-end actin filament capping	2	0.015	Biological Process	GO:0051016	barbed-end actin filament capping
GO:0051017 actin filament bundle assembly	4	0.031	Biological Process	GO:0051017	actin filament bundle assembly
GO:0051028 mRNA transport	2	0.015	Biological Process	GO:0051028	mRNA transport
GO:0051049 regulation of transport	9	0.07	Biological Process	GO:0051049	regulation of transport
GO:0051052 regulation of DNA metabolic process	7	0.054	Biological Process	GO:0051052	regulation of DNA metabolic process
GO:0051053 negative regulation of DNA metabolic process	3	0.023	Biological Process	GO:0051053	negative regulation of DNA metabolic process
GO:0051054 positive regulation of DNA metabolic process	1	0.008	Biological Process	GO:0051054	positive regulation of DNA metabolic process
GO:0051056 regulation of small GTPase mediated signal transduction	5	0.039	Biological Process	GO:0051056	regulation of small GTPase mediated signal transduction
GO:0051090 regulation of sequence-specific DNA binding transcription factor activity	2	0.015	Biological Process	GO:0051090	regulation of sequence-specific DNA binding transcription factor activity
GO:0051094 positive regulation of developmental process	1	0.008	Biological Process	GO:0051094	positive regulation of developmental process
GO:0051103 DNA ligation involved in DNA repair	3	0.023	Biological Process	GO:0051103	DNA ligation involved in DNA repair
GO:0051128 regulation of cellular component organization	59	0.456	Biological Process	GO:0051128	regulation of cellular component organization
GO:0051129 negative regulation of cellular component organization	8	0.062	Biological Process	GO:0051129	negative regulation of cellular component organization
GO:0051130 positive regulation of cellular component organization	22	0.17	Biological Process	GO:0051130	positive regulation of cellular component organization
GO:0051156 glucose 6-phosphate metabolic process	10	0.077	Biological Process	GO:0051156	glucose 6-phosphate metabolic process
GO:0051168 nuclear export	1	0.008	Biological Process	GO:0051168	nuclear export
GO:0051169 nuclear transport	68	0.526	Biological Process	GO:0051169	nuclear transport
GO:0051170 nuclear import	10	0.077	Biological Process	GO:0051170	nuclear import
GO:0051171 regulation of nitrogen compound metabolic process	1007	7.784	Biological Process	GO:0051171	regulation of nitrogen compound metabolic process
GO:0051172 negative regulation of nitrogen compound metabolic process	7	0.054	Biological Process	GO:0051172	negative regulation of nitrogen compound metabolic process
GO:0051173 positive regulation of nitrogen compound metabolic process	16	0.124	Biological Process	GO:0051173	positive regulation of nitrogen compound metabolic process
GO:0051174 regulation of phosphorus metabolic process	13	0.1	Biological Process	GO:0051174	regulation of phosphorus metabolic process
GO:0051179 localization	1639	12.669	Biological Process	GO:0051179	localization
GO:0051186 cofactor metabolic process	154	1.19	Biological Process	GO:0051186	cofactor metabolic process
GO:0051187 cofactor catabolic process	6	0.046	Biological Process	GO:0051187	cofactor catabolic process
GO:0051188 cofactor biosynthetic process	71	0.549	Biological Process	GO:0051188	cofactor biosynthetic process
GO:0051189 prosthetic group metabolic process	4	0.031	Biological Process	GO:0051189	prosthetic group metabolic process
GO:0051202 phytochromobilin metabolic process	4	0.031	Biological Process	GO:0051202	phytochromobilin metabolic process
GO:0051205 protein insertion into membrane	7	0.054	Biological Process	GO:0051205	protein insertion into membrane
GO:0051220 cytoplasmic sequestering of protein	6	0.046	Biological Process	GO:0051220	cytoplasmic sequestering of protein
GO:0051225 spindle assembly	5	0.039	Biological Process	GO:0051225	spindle assembly
GO:0051234 establishment of localization	1632	12.615	Biological Process	GO:0051234	establishment of localization
GO:0051235 maintenance of location	7	0.054	Biological Process	GO:0051235	maintenance of location
GO:0051236 establishment of RNA localization	2	0.015	Biological Process	GO:0051236	establishment of RNA localization
GO:0051239 regulation of multicellular organismal process	2	0.015	Biological Process	GO:0051239	regulation of multicellular organismal process
GO:0051240 positive regulation of multicellular organismal process	1	0.008	Biological Process	GO:0051240	positive regulation of multicellular organismal process
GO:0051246 regulation of protein metabolic process	27	0.209	Biological Process	GO:0051246	regulation of protein metabolic process
GO:0051247 positive regulation of protein metabolic process	10	0.077	Biological Process	GO:0051247	positive regulation of protein metabolic process
GO:0051248 negative regulation of protein metabolic process	7	0.054	Biological Process	GO:0051248	negative regulation of protein metabolic process
GO:0051252 regulation of RNA metabolic process	994	7.683	Biological Process	GO:0051252	regulation of RNA metabolic process
GO:0051253 negative regulation of RNA metabolic process	3	0.023	Biological Process	GO:0051253	negative regulation of RNA metabolic process
GO:0051254 positive regulation of RNA metabolic process	11	0.085	Biological Process	GO:0051254	positive regulation of RNA metabolic process
GO:0051258 protein polymerization	21	0.162	Biological Process	GO:0051258	protein polymerization
GO:0051259 protein oligomerization	5	0.039	Biological Process	GO:0051259	protein oligomerization
GO:0051260 protein homooligomerization	4	0.031	Biological Process	GO:0051260	protein homooligomerization
GO:0051261 protein depolymerization	11	0.085	Biological Process	GO:0051261	protein depolymerization
GO:0051270 regulation of cellular component movement	1	0.008	Biological Process	GO:0051270	regulation of cellular component movement
GO:0051273 beta-glucan metabolic process	82	0.634	Biological Process	GO:0051273	beta-glucan metabolic process
GO:0051274 beta-glucan biosynthetic process	82	0.634	Biological Process	GO:0051274	beta-glucan biosynthetic process
GO:0051276 chromosome organization	144	1.113	Biological Process	GO:0051276	chromosome organization
GO:0051301 cell division	38	0.294	Biological Process	GO:0051301	cell division
GO:0051302 regulation of cell division	28	0.216	Biological Process	GO:0051302	regulation of cell division
GO:0051304 chromosome separation	27	0.209	Biological Process	GO:0051304	chromosome separation
GO:0051306 mitotic sister chromatid separation	26	0.201	Biological Process	GO:0051306	mitotic sister chromatid separation
GO:0051321 meiotic cell cycle	3	0.023	Biological Process	GO:0051321	meiotic cell cycle
GO:0051322 anaphase	1	0.008	Biological Process	GO:0051322	anaphase
GO:0051336 regulation of hydrolase activity	3	0.023	Biological Process	GO:0051336	regulation of hydrolase activity
GO:0051338 regulation of transferase activity	18	0.139	Biological Process	GO:0051338	regulation of transferase activity
GO:0051340 regulation of ligase activity	6	0.046	Biological Process	GO:0051340	regulation of ligase activity
GO:0051341 regulation of oxidoreductase activity	2	0.015	Biological Process	GO:0051341	regulation of oxidoreductase activity
GO:0051346 negative regulation of hydrolase activity	1	0.008	Biological Process	GO:0051346	negative regulation of hydrolase activity
GO:0051347 positive regulation of transferase activity	6	0.046	Biological Process	GO:0051347	positive regulation of transferase activity
GO:0051348 negative regulation of transferase activity	6	0.046	Biological Process	GO:0051348	negative regulation of transferase activity
GO:0051352 negative regulation of ligase activity	6	0.046	Biological Process	GO:0051352	negative regulation of ligase activity
GO:0051353 positive regulation of oxidoreductase activity	1	0.008	Biological Process	GO:0051353	positive regulation of oxidoreductase activity
GO:0051382 kinetochore assembly	3	0.023	Biological Process	GO:0051382	kinetochore assembly
GO:0051383 kinetochore organization	3	0.023	Biological Process	GO:0051383	kinetochore organization
GO:0051436 negative regulation of ubiquitin-protein ligase activity involved in mitotic cell cycle	6	0.046	Biological Process	GO:0051436	negative regulation of ubiquitin-protein ligase activity involved in mitotic cell cycle
GO:0051438 regulation of ubiquitin-protein transferase activity	6	0.046	Biological Process	GO:0051438	regulation of ubiquitin-protein transferase activity
GO:0051439 regulation of ubiquitin-protein ligase activity involved in mitotic cell cycle	6	0.046	Biological Process	GO:0051439	regulation of ubiquitin-protein ligase activity involved in mitotic cell cycle
GO:0051444 negative regulation of ubiquitin-protein transferase activity	6	0.046	Biological Process	GO:0051444	negative regulation of ubiquitin-protein transferase activity
GO:0051493 regulation of cytoskeleton organization	27	0.209	Biological Process	GO:0051493	regulation of cytoskeleton organization
GO:0051494 negative regulation of cytoskeleton organization	2	0.015	Biological Process	GO:0051494	negative regulation of cytoskeleton organization
GO:0051495 positive regulation of cytoskeleton organization	18	0.139	Biological Process	GO:0051495	positive regulation of cytoskeleton organization
GO:0051568 histone H3-K4 methylation	1	0.008	Biological Process	GO:0051568	histone H3-K4 methylation
GO:0051596 methylglyoxal catabolic process	1	0.008	Biological Process	GO:0051596	methylglyoxal catabolic process
GO:0051603 proteolysis involved in cellular protein catabolic process	126	0.974	Biological Process	GO:0051603	proteolysis involved in cellular protein catabolic process
GO:0051604 protein maturation	9	0.07	Biological Process	GO:0051604	protein maturation
GO:0051606 detection of stimulus	4	0.031	Biological Process	GO:0051606	detection of stimulus
GO:0051640 organelle localization	9	0.07	Biological Process	GO:0051640	organelle localization
GO:0051641 cellular localization	324	2.504	Biological Process	GO:0051641	cellular localization
GO:0051644 plastid localization	8	0.062	Biological Process	GO:0051644	plastid localization
GO:0051648 vesicle localization	1	0.008	Biological Process	GO:0051648	vesicle localization
GO:0051649 establishment of localization in cell	311	2.404	Biological Process	GO:0051649	establishment of localization in cell
GO:0051650 establishment of vesicle localization	1	0.008	Biological Process	GO:0051650	establishment of vesicle localization
GO:0051651 maintenance of location in cell	6	0.046	Biological Process	GO:0051651	maintenance of location in cell
GO:0051656 establishment of organelle localization	9	0.07	Biological Process	GO:0051656	establishment of organelle localization
GO:0051667 establishment of plastid localization	8	0.062	Biological Process	GO:0051667	establishment of plastid localization
GO:0051668 localization within membrane	1	0.008	Biological Process	GO:0051668	localization within membrane
GO:0051674 localization of cell	1	0.008	Biological Process	GO:0051674	localization of cell
GO:0051693 actin filament capping	2	0.015	Biological Process	GO:0051693	actin filament capping
GO:0051704 multi-organism process	191	1.476	Biological Process	GO:0051704	multi-organism process
GO:0051707 response to other organism	12	0.093	Biological Process	GO:0051707	response to other organism
GO:0051716 cellular response to stimulus	1312	10.141	Biological Process	GO:0051716	cellular response to stimulus
GO:0051726 regulation of cell cycle	53	0.41	Biological Process	GO:0051726	regulation of cell cycle
GO:0051782 negative regulation of cell division	6	0.046	Biological Process	GO:0051782	negative regulation of cell division
GO:0051783 regulation of nuclear division	26	0.201	Biological Process	GO:0051783	regulation of nuclear division
GO:0051784 negative regulation of nuclear division	6	0.046	Biological Process	GO:0051784	negative regulation of nuclear division
GO:0051983 regulation of chromosome segregation	26	0.201	Biological Process	GO:0051983	regulation of chromosome segregation
GO:0051985 negative regulation of chromosome segregation	6	0.046	Biological Process	GO:0051985	negative regulation of chromosome segregation
GO:0052646 alditol phosphate metabolic process	6	0.046	Biological Process	GO:0052646	alditol phosphate metabolic process
GO:0052803 imidazole-containing compound metabolic process	7	0.054	Biological Process	GO:0052803	imidazole-containing compound metabolic process
GO:0055065 metal ion homeostasis	10	0.077	Biological Process	GO:0055065	metal ion homeostasis
GO:0055067 monovalent inorganic cation homeostasis	6	0.046	Biological Process	GO:0055067	monovalent inorganic cation homeostasis
GO:0055072 iron ion homeostasis	4	0.031	Biological Process	GO:0055072	iron ion homeostasis
GO:0055075 potassium ion homeostasis	6	0.046	Biological Process	GO:0055075	potassium ion homeostasis
GO:0055076 transition metal ion homeostasis	4	0.031	Biological Process	GO:0055076	transition metal ion homeostasis
GO:0055080 cation homeostasis	10	0.077	Biological Process	GO:0055080	cation homeostasis
GO:0055082 cellular chemical homeostasis	12	0.093	Biological Process	GO:0055082	cellular chemical homeostasis
GO:0055085 transmembrane transport	811	6.269	Biological Process	GO:0055085	transmembrane transport
GO:0055086 nucleobase-containing small molecule metabolic process	202	1.561	Biological Process	GO:0055086	nucleobase-containing small molecule metabolic process
GO:0055114 oxidation-reduction process	1845	14.261	Biological Process	GO:0055114	oxidation-reduction process
GO:0060236 regulation of mitotic spindle organization	6	0.046	Biological Process	GO:0060236	regulation of mitotic spindle organization
GO:0060249 anatomical structure homeostasis	7	0.054	Biological Process	GO:0060249	anatomical structure homeostasis
GO:0060255 regulation of macromolecule metabolic process	1041	8.047	Biological Process	GO:0060255	regulation of macromolecule metabolic process
GO:0060548 negative regulation of cell death	3	0.023	Biological Process	GO:0060548	negative regulation of cell death
GO:0060627 regulation of vesicle-mediated transport	1	0.008	Biological Process	GO:0060627	regulation of vesicle-mediated transport
GO:0060918 auxin transport	1	0.008	Biological Process	GO:0060918	auxin transport
GO:0061024 membrane organization	26	0.201	Biological Process	GO:0061024	membrane organization
GO:0061025 membrane fusion	1	0.008	Biological Process	GO:0061025	membrane fusion
GO:0061136 regulation of proteasomal protein catabolic process	6	0.046	Biological Process	GO:0061136	regulation of proteasomal protein catabolic process
GO:0061458 reproductive system development	2	0.015	Biological Process	GO:0061458	reproductive system development
GO:0061572 actin filament bundle organization	4	0.031	Biological Process	GO:0061572	actin filament bundle organization
GO:0061640 cytoskeleton-dependent cytokinesis	1	0.008	Biological Process	GO:0061640	cytoskeleton-dependent cytokinesis
GO:0061727 methylglyoxal catabolic process to lactate	1	0.008	Biological Process	GO:0061727	methylglyoxal catabolic process to lactate
GO:0065002 intracellular protein transmembrane transport	11	0.085	Biological Process	GO:0065002	intracellular protein transmembrane transport
GO:0065003 macromolecular complex assembly	96	0.742	Biological Process	GO:0065003	macromolecular complex assembly
GO:0065004 protein-DNA complex assembly	27	0.209	Biological Process	GO:0065004	protein-DNA complex assembly
GO:0065007 biological regulation	2404	18.582	Biological Process	GO:0065007	biological regulation
GO:0065008 regulation of biological quality	166	1.283	Biological Process	GO:0065008	regulation of biological quality
GO:0065009 regulation of molecular function	29	0.224	Biological Process	GO:0065009	regulation of molecular function
GO:0070070 proton-transporting V-type ATPase complex assembly	1	0.008	Biological Process	GO:0070070	proton-transporting V-type ATPase complex assembly
GO:0070071 proton-transporting two-sector ATPase complex assembly	2	0.015	Biological Process	GO:0070071	proton-transporting two-sector ATPase complex assembly
GO:0070072 vacuolar proton-transporting V-type ATPase complex assembly	1	0.008	Biological Process	GO:0070072	vacuolar proton-transporting V-type ATPase complex assembly
GO:0070085 glycosylation	55	0.425	Biological Process	GO:0070085	glycosylation
GO:0070189 kynurenine metabolic process	3	0.023	Biological Process	GO:0070189	kynurenine metabolic process
GO:0070271 protein complex biogenesis	81	0.626	Biological Process	GO:0070271	protein complex biogenesis
GO:0070272 proton-transporting ATP synthase complex biogenesis	1	0.008	Biological Process	GO:0070272	proton-transporting ATP synthase complex biogenesis
GO:0070297 regulation of phosphorelay signal transduction system	3	0.023	Biological Process	GO:0070297	regulation of phosphorelay signal transduction system
GO:0070298 negative regulation of phosphorelay signal transduction system	3	0.023	Biological Process	GO:0070298	negative regulation of phosphorelay signal transduction system
GO:0070481 nuclear-transcribed mRNA catabolic process, non-stop decay	1	0.008	Biological Process	GO:0070481	nuclear-transcribed mRNA catabolic process, non-stop decay
GO:0070507 regulation of microtubule cytoskeleton organization	14	0.108	Biological Process	GO:0070507	regulation of microtubule cytoskeleton organization
GO:0070585 protein localization to mitochondrion	8	0.062	Biological Process	GO:0070585	protein localization to mitochondrion
GO:0070589 cellular component macromolecule biosynthetic process	4	0.031	Biological Process	GO:0070589	cellular component macromolecule biosynthetic process
GO:0070592 cell wall polysaccharide biosynthetic process	4	0.031	Biological Process	GO:0070592	cell wall polysaccharide biosynthetic process
GO:0070646 protein modification by small protein removal	37	0.286	Biological Process	GO:0070646	protein modification by small protein removal
GO:0070647 protein modification by small protein conjugation or removal	169	1.306	Biological Process	GO:0070647	protein modification by small protein conjugation or removal
GO:0070726 cell wall assembly	16	0.124	Biological Process	GO:0070726	cell wall assembly
GO:0070727 cellular macromolecule localization	222	1.716	Biological Process	GO:0070727	cellular macromolecule localization
GO:0070838 divalent metal ion transport	15	0.116	Biological Process	GO:0070838	divalent metal ion transport
GO:0070887 cellular response to chemical stimulus	59	0.456	Biological Process	GO:0070887	cellular response to chemical stimulus
GO:0070925 organelle assembly	15	0.116	Biological Process	GO:0070925	organelle assembly
GO:0070966 nuclear-transcribed mRNA catabolic process, no-go decay	1	0.008	Biological Process	GO:0070966	nuclear-transcribed mRNA catabolic process, no-go decay
GO:0070972 protein localization to endoplasmic reticulum	18	0.139	Biological Process	GO:0070972	protein localization to endoplasmic reticulum
GO:0070988 demethylation	1	0.008	Biological Process	GO:0070988	demethylation
GO:0071025 RNA surveillance	1	0.008	Biological Process	GO:0071025	RNA surveillance
GO:0071103 DNA conformation change	52	0.402	Biological Process	GO:0071103	DNA conformation change
GO:0071166 ribonucleoprotein complex localization	1	0.008	Biological Process	GO:0071166	ribonucleoprotein complex localization
GO:0071173 spindle assembly checkpoint	6	0.046	Biological Process	GO:0071173	spindle assembly checkpoint
GO:0071174 mitotic spindle checkpoint	6	0.046	Biological Process	GO:0071174	mitotic spindle checkpoint
GO:0071214 cellular response to abiotic stimulus	5	0.039	Biological Process	GO:0071214	cellular response to abiotic stimulus
GO:0071229 cellular response to acid chemical	51	0.394	Biological Process	GO:0071229	cellular response to acid chemical
GO:0071265 L-methionine biosynthetic process	1	0.008	Biological Process	GO:0071265	L-methionine biosynthetic process
GO:0071267 L-methionine salvage	1	0.008	Biological Process	GO:0071267	L-methionine salvage
GO:0071310 cellular response to organic substance	57	0.441	Biological Process	GO:0071310	cellular response to organic substance
GO:0071367 cellular response to brassinosteroid stimulus	3	0.023	Biological Process	GO:0071367	cellular response to brassinosteroid stimulus
GO:0071369 cellular response to ethylene stimulus	3	0.023	Biological Process	GO:0071369	cellular response to ethylene stimulus
GO:0071383 cellular response to steroid hormone stimulus	3	0.023	Biological Process	GO:0071383	cellular response to steroid hormone stimulus
GO:0071395 cellular response to jasmonic acid stimulus	2	0.015	Biological Process	GO:0071395	cellular response to jasmonic acid stimulus
GO:0071396 cellular response to lipid	3	0.023	Biological Process	GO:0071396	cellular response to lipid
GO:0071407 cellular response to organic cyclic compound	52	0.402	Biological Process	GO:0071407	cellular response to organic cyclic compound
GO:0071426 ribonucleoprotein complex export from nucleus	1	0.008	Biological Process	GO:0071426	ribonucleoprotein complex export from nucleus
GO:0071427 mRNA-containing ribonucleoprotein complex export from nucleus	1	0.008	Biological Process	GO:0071427	mRNA-containing ribonucleoprotein complex export from nucleus
GO:0071446 cellular response to salicylic acid stimulus	49	0.379	Biological Process	GO:0071446	cellular response to salicylic acid stimulus
GO:0071450 cellular response to oxygen radical	1	0.008	Biological Process	GO:0071450	cellular response to oxygen radical
GO:0071451 cellular response to superoxide	1	0.008	Biological Process	GO:0071451	cellular response to superoxide
GO:0071478 cellular response to radiation	5	0.039	Biological Process	GO:0071478	cellular response to radiation
GO:0071482 cellular response to light stimulus	5	0.039	Biological Process	GO:0071482	cellular response to light stimulus
GO:0071484 cellular response to light intensity	1	0.008	Biological Process	GO:0071484	cellular response to light intensity
GO:0071486 cellular response to high light intensity	1	0.008	Biological Process	GO:0071486	cellular response to high light intensity
GO:0071489 cellular response to red or far red light	4	0.031	Biological Process	GO:0071489	cellular response to red or far red light
GO:0071495 cellular response to endogenous stimulus	8	0.062	Biological Process	GO:0071495	cellular response to endogenous stimulus
GO:0071496 cellular response to external stimulus	15	0.116	Biological Process	GO:0071496	cellular response to external stimulus
GO:0071554 cell wall organization or biogenesis	162	1.252	Biological Process	GO:0071554	cell wall organization or biogenesis
GO:0071555 cell wall organization	98	0.758	Biological Process	GO:0071555	cell wall organization
GO:0071586 CAAX-box protein processing	1	0.008	Biological Process	GO:0071586	CAAX-box protein processing
GO:0071616 acyl-CoA biosynthetic process	2	0.015	Biological Process	GO:0071616	acyl-CoA biosynthetic process
GO:0071668 plant-type cell wall assembly	16	0.124	Biological Process	GO:0071668	plant-type cell wall assembly
GO:0071669 plant-type cell wall organization or biogenesis	23	0.178	Biological Process	GO:0071669	plant-type cell wall organization or biogenesis
GO:0071702 organic substance transport	387	2.991	Biological Process	GO:0071702	organic substance transport
GO:0071704 organic substance metabolic process	6674	51.588	Biological Process	GO:0071704	organic substance metabolic process
GO:0071705 nitrogen compound transport	73	0.564	Biological Process	GO:0071705	nitrogen compound transport
GO:0071804 cellular potassium ion transport	30	0.232	Biological Process	GO:0071804	cellular potassium ion transport
GO:0071805 potassium ion transmembrane transport	30	0.232	Biological Process	GO:0071805	potassium ion transmembrane transport
GO:0071806 protein transmembrane transport	11	0.085	Biological Process	GO:0071806	protein transmembrane transport
GO:0071816 tail-anchored membrane protein insertion into ER membrane	1	0.008	Biological Process	GO:0071816	tail-anchored membrane protein insertion into ER membrane
GO:0071822 protein complex subunit organization	134	1.036	Biological Process	GO:0071822	protein complex subunit organization
GO:0071824 protein-DNA complex subunit organization	28	0.216	Biological Process	GO:0071824	protein-DNA complex subunit organization
GO:0071826 ribonucleoprotein complex subunit organization	15	0.116	Biological Process	GO:0071826	ribonucleoprotein complex subunit organization
GO:0071840 cellular component organization or biogenesis	542	4.19	Biological Process	GO:0071840	cellular component organization or biogenesis
GO:0071897 DNA biosynthetic process	4	0.031	Biological Process	GO:0071897	DNA biosynthetic process
GO:0071900 regulation of protein serine/threonine kinase activity	5	0.039	Biological Process	GO:0071900	regulation of protein serine/threonine kinase activity
GO:0071918 urea transmembrane transport	2	0.015	Biological Process	GO:0071918	urea transmembrane transport
GO:0071941 nitrogen cycle metabolic process	4	0.031	Biological Process	GO:0071941	nitrogen cycle metabolic process
GO:0072329 monocarboxylic acid catabolic process	4	0.031	Biological Process	GO:0072329	monocarboxylic acid catabolic process
GO:0072330 monocarboxylic acid biosynthetic process	92	0.711	Biological Process	GO:0072330	monocarboxylic acid biosynthetic process
GO:0072348 sulfur compound transport	18	0.139	Biological Process	GO:0072348	sulfur compound transport
GO:0072350 tricarboxylic acid metabolic process	12	0.093	Biological Process	GO:0072350	tricarboxylic acid metabolic process
GO:0072351 tricarboxylic acid biosynthetic process	2	0.015	Biological Process	GO:0072351	tricarboxylic acid biosynthetic process
GO:0072488 ammonium transmembrane transport	7	0.054	Biological Process	GO:0072488	ammonium transmembrane transport
GO:0072511 divalent inorganic cation transport	15	0.116	Biological Process	GO:0072511	divalent inorganic cation transport
GO:0072521 purine-containing compound metabolic process	138	1.067	Biological Process	GO:0072521	purine-containing compound metabolic process
GO:0072522 purine-containing compound biosynthetic process	55	0.425	Biological Process	GO:0072522	purine-containing compound biosynthetic process
GO:0072524 pyridine-containing compound metabolic process	83	0.642	Biological Process	GO:0072524	pyridine-containing compound metabolic process
GO:0072525 pyridine-containing compound biosynthetic process	15	0.116	Biological Process	GO:0072525	pyridine-containing compound biosynthetic process
GO:0072527 pyrimidine-containing compound metabolic process	28	0.216	Biological Process	GO:0072527	pyrimidine-containing compound metabolic process
GO:0072528 pyrimidine-containing compound biosynthetic process	26	0.201	Biological Process	GO:0072528	pyrimidine-containing compound biosynthetic process
GO:0072593 reactive oxygen species metabolic process	14	0.108	Biological Process	GO:0072593	reactive oxygen species metabolic process
GO:0072594 establishment of protein localization to organelle	38	0.294	Biological Process	GO:0072594	establishment of protein localization to organelle
GO:0072595 maintenance of protein localization in organelle	5	0.039	Biological Process	GO:0072595	maintenance of protein localization in organelle
GO:0072596 establishment of protein localization to chloroplast	1	0.008	Biological Process	GO:0072596	establishment of protein localization to chloroplast
GO:0072598 protein localization to chloroplast	1	0.008	Biological Process	GO:0072598	protein localization to chloroplast
GO:0072599 establishment of protein localization to endoplasmic reticulum	13	0.1	Biological Process	GO:0072599	establishment of protein localization to endoplasmic reticulum
GO:0072600 establishment of protein localization to Golgi	1	0.008	Biological Process	GO:0072600	establishment of protein localization to Golgi
GO:0072655 establishment of protein localization to mitochondrion	8	0.062	Biological Process	GO:0072655	establishment of protein localization to mitochondrion
GO:0072657 protein localization to membrane	24	0.186	Biological Process	GO:0072657	protein localization to membrane
GO:0072662 protein localization to peroxisome	5	0.039	Biological Process	GO:0072662	protein localization to peroxisome
GO:0072663 establishment of protein localization to peroxisome	5	0.039	Biological Process	GO:0072663	establishment of protein localization to peroxisome
GO:0080090 regulation of primary metabolic process	1028	7.946	Biological Process	GO:0080090	regulation of primary metabolic process
GO:0080120 CAAX-box protein maturation	1	0.008	Biological Process	GO:0080120	CAAX-box protein maturation
GO:0080134 regulation of response to stress	65	0.502	Biological Process	GO:0080134	regulation of response to stress
GO:0080135 regulation of cellular response to stress	3	0.023	Biological Process	GO:0080135	regulation of cellular response to stress
GO:0090063 positive regulation of microtubule nucleation	7	0.054	Biological Process	GO:0090063	positive regulation of microtubule nucleation
GO:0090066 regulation of anatomical structure size	13	0.1	Biological Process	GO:0090066	regulation of anatomical structure size
GO:0090114 COPII-coated vesicle budding	1	0.008	Biological Process	GO:0090114	COPII-coated vesicle budding
GO:0090150 establishment of protein localization to membrane	24	0.186	Biological Process	GO:0090150	establishment of protein localization to membrane
GO:0090151 establishment of protein localization to mitochondrial membrane	3	0.023	Biological Process	GO:0090151	establishment of protein localization to mitochondrial membrane
GO:0090174 organelle membrane fusion	1	0.008	Biological Process	GO:0090174	organelle membrane fusion
GO:0090224 regulation of spindle organization	6	0.046	Biological Process	GO:0090224	regulation of spindle organization
GO:0090231 regulation of spindle checkpoint	1	0.008	Biological Process	GO:0090231	regulation of spindle checkpoint
GO:0090266 regulation of mitotic cell cycle spindle assembly checkpoint	1	0.008	Biological Process	GO:0090266	regulation of mitotic cell cycle spindle assembly checkpoint
GO:0090304 nucleic acid metabolic process	1683	13.009	Biological Process	GO:0090304	nucleic acid metabolic process
GO:0090305 nucleic acid phosphodiester bond hydrolysis	5	0.039	Biological Process	GO:0090305	nucleic acid phosphodiester bond hydrolysis
GO:0090322 regulation of superoxide metabolic process	1	0.008	Biological Process	GO:0090322	regulation of superoxide metabolic process
GO:0090329 regulation of DNA-dependent DNA replication	1	0.008	Biological Process	GO:0090329	regulation of DNA-dependent DNA replication
GO:0090407 organophosphate biosynthetic process	120	0.928	Biological Process	GO:0090407	organophosphate biosynthetic process
GO:0090501 RNA phosphodiester bond hydrolysis	2	0.015	Biological Process	GO:0090501	RNA phosphodiester bond hydrolysis
GO:0090529 cell septum assembly	1	0.008	Biological Process	GO:0090529	cell septum assembly
GO:0090558 plant epidermis development	1	0.008	Biological Process	GO:0090558	plant epidermis development
GO:0090567 reproductive shoot system development	2	0.015	Biological Process	GO:0090567	reproductive shoot system development
GO:0090662 ATP hydrolysis coupled transmembrane transport	25	0.193	Biological Process	GO:0090662	ATP hydrolysis coupled transmembrane transport
GO:0097033 mitochondrial respiratory chain complex III biogenesis	8	0.062	Biological Process	GO:0097033	mitochondrial respiratory chain complex III biogenesis
GO:0097164 ammonium ion metabolic process	17	0.131	Biological Process	GO:0097164	ammonium ion metabolic process
GO:0097305 response to alcohol	7	0.054	Biological Process	GO:0097305	response to alcohol
GO:0097306 cellular response to alcohol	3	0.023	Biological Process	GO:0097306	cellular response to alcohol
GO:0097354 prenylation	10	0.077	Biological Process	GO:0097354	prenylation
GO:0097659 nucleic acid-templated transcription	1108	8.565	Biological Process	GO:0097659	nucleic acid-templated transcription
GO:0098542 defense response to other organism	12	0.093	Biological Process	GO:0098542	defense response to other organism
GO:0098655 cation transmembrane transport	95	0.734	Biological Process	GO:0098655	cation transmembrane transport
GO:0098656 anion transmembrane transport	36	0.278	Biological Process	GO:0098656	anion transmembrane transport
GO:0098660 inorganic ion transmembrane transport	101	0.781	Biological Process	GO:0098660	inorganic ion transmembrane transport
GO:0098661 inorganic anion transmembrane transport	6	0.046	Biological Process	GO:0098661	inorganic anion transmembrane transport
GO:0098662 inorganic cation transmembrane transport	95	0.734	Biological Process	GO:0098662	inorganic cation transmembrane transport
GO:0098732 macromolecule deacylation	3	0.023	Biological Process	GO:0098732	macromolecule deacylation
GO:0098754 detoxification	1	0.008	Biological Process	GO:0098754	detoxification
GO:0098763 mitotic cell cycle phase	1	0.008	Biological Process	GO:0098763	mitotic cell cycle phase
GO:0098771 inorganic ion homeostasis	10	0.077	Biological Process	GO:0098771	inorganic ion homeostasis
GO:0098813 nuclear chromosome segregation	45	0.348	Biological Process	GO:0098813	nuclear chromosome segregation
GO:0098869 cellular oxidant detoxification	1	0.008	Biological Process	GO:0098869	cellular oxidant detoxification
GO:0099402 plant organ development	2	0.015	Biological Process	GO:0099402	plant organ development
GO:1900407 regulation of cellular response to oxidative stress	1	0.008	Biological Process	GO:1900407	regulation of cellular response to oxidative stress
GO:1900409 positive regulation of cellular response to oxidative stress	1	0.008	Biological Process	GO:1900409	positive regulation of cellular response to oxidative stress
GO:1901031 regulation of response to reactive oxygen species	1	0.008	Biological Process	GO:1901031	regulation of response to reactive oxygen species
GO:1901033 positive regulation of response to reactive oxygen species	1	0.008	Biological Process	GO:1901033	positive regulation of response to reactive oxygen species
GO:1901068 guanosine-containing compound metabolic process	11	0.085	Biological Process	GO:1901068	guanosine-containing compound metabolic process
GO:1901070 guanosine-containing compound biosynthetic process	6	0.046	Biological Process	GO:1901070	guanosine-containing compound biosynthetic process
GO:1901071 glucosamine-containing compound metabolic process	40	0.309	Biological Process	GO:1901071	glucosamine-containing compound metabolic process
GO:1901072 glucosamine-containing compound catabolic process	40	0.309	Biological Process	GO:1901072	glucosamine-containing compound catabolic process
GO:1901135 carbohydrate derivative metabolic process	303	2.342	Biological Process	GO:1901135	carbohydrate derivative metabolic process
GO:1901136 carbohydrate derivative catabolic process	49	0.379	Biological Process	GO:1901136	carbohydrate derivative catabolic process
GO:1901137 carbohydrate derivative biosynthetic process	132	1.02	Biological Process	GO:1901137	carbohydrate derivative biosynthetic process
GO:1901264 carbohydrate derivative transport	14	0.108	Biological Process	GO:1901264	carbohydrate derivative transport
GO:1901269 lipooligosaccharide metabolic process	3	0.023	Biological Process	GO:1901269	lipooligosaccharide metabolic process
GO:1901271 lipooligosaccharide biosynthetic process	3	0.023	Biological Process	GO:1901271	lipooligosaccharide biosynthetic process
GO:1901292 nucleoside phosphate catabolic process	1	0.008	Biological Process	GO:1901292	nucleoside phosphate catabolic process
GO:1901293 nucleoside phosphate biosynthetic process	74	0.572	Biological Process	GO:1901293	nucleoside phosphate biosynthetic process
GO:1901334 lactone metabolic process	2	0.015	Biological Process	GO:1901334	lactone metabolic process
GO:1901336 lactone biosynthetic process	2	0.015	Biological Process	GO:1901336	lactone biosynthetic process
GO:1901360 organic cyclic compound metabolic process	2060	15.923	Biological Process	GO:1901360	organic cyclic compound metabolic process
GO:1901361 organic cyclic compound catabolic process	30	0.232	Biological Process	GO:1901361	organic cyclic compound catabolic process
GO:1901362 organic cyclic compound biosynthetic process	1317	10.18	Biological Process	GO:1901362	organic cyclic compound biosynthetic process
GO:1901564 organonitrogen compound metabolic process	905	6.995	Biological Process	GO:1901564	organonitrogen compound metabolic process
GO:1901565 organonitrogen compound catabolic process	67	0.518	Biological Process	GO:1901565	organonitrogen compound catabolic process
GO:1901566 organonitrogen compound biosynthetic process	624	4.823	Biological Process	GO:1901566	organonitrogen compound biosynthetic process
GO:1901568 fatty acid derivative metabolic process	2	0.015	Biological Process	GO:1901568	fatty acid derivative metabolic process
GO:1901570 fatty acid derivative biosynthetic process	2	0.015	Biological Process	GO:1901570	fatty acid derivative biosynthetic process
GO:1901575 organic substance catabolic process	313	2.419	Biological Process	GO:1901575	organic substance catabolic process
GO:1901576 organic substance biosynthetic process	2166	16.743	Biological Process	GO:1901576	organic substance biosynthetic process
GO:1901600 strigolactone metabolic process	2	0.015	Biological Process	GO:1901600	strigolactone metabolic process
GO:1901601 strigolactone biosynthetic process	2	0.015	Biological Process	GO:1901601	strigolactone biosynthetic process
GO:1901605 alpha-amino acid metabolic process	133	1.028	Biological Process	GO:1901605	alpha-amino acid metabolic process
GO:1901606 alpha-amino acid catabolic process	13	0.1	Biological Process	GO:1901606	alpha-amino acid catabolic process
GO:1901607 alpha-amino acid biosynthetic process	96	0.742	Biological Process	GO:1901607	alpha-amino acid biosynthetic process
GO:1901615 organic hydroxy compound metabolic process	40	0.309	Biological Process	GO:1901615	organic hydroxy compound metabolic process
GO:1901616 organic hydroxy compound catabolic process	3	0.023	Biological Process	GO:1901616	organic hydroxy compound catabolic process
GO:1901617 organic hydroxy compound biosynthetic process	11	0.085	Biological Process	GO:1901617	organic hydroxy compound biosynthetic process
GO:1901657 glycosyl compound metabolic process	144	1.113	Biological Process	GO:1901657	glycosyl compound metabolic process
GO:1901659 glycosyl compound biosynthetic process	42	0.325	Biological Process	GO:1901659	glycosyl compound biosynthetic process
GO:1901661 quinone metabolic process	1	0.008	Biological Process	GO:1901661	quinone metabolic process
GO:1901663 quinone biosynthetic process	1	0.008	Biological Process	GO:1901663	quinone biosynthetic process
GO:1901668 regulation of superoxide dismutase activity	1	0.008	Biological Process	GO:1901668	regulation of superoxide dismutase activity
GO:1901671 positive regulation of superoxide dismutase activity	1	0.008	Biological Process	GO:1901671	positive regulation of superoxide dismutase activity
GO:1901700 response to oxygen-containing compound	73	0.564	Biological Process	GO:1901700	response to oxygen-containing compound
GO:1901701 cellular response to oxygen-containing compound	55	0.425	Biological Process	GO:1901701	cellular response to oxygen-containing compound
GO:1901799 negative regulation of proteasomal protein catabolic process	6	0.046	Biological Process	GO:1901799	negative regulation of proteasomal protein catabolic process
GO:1901879 regulation of protein depolymerization	2	0.015	Biological Process	GO:1901879	regulation of protein depolymerization
GO:1901880 negative regulation of protein depolymerization	2	0.015	Biological Process	GO:1901880	negative regulation of protein depolymerization
GO:1901891 regulation of cell septum assembly	1	0.008	Biological Process	GO:1901891	regulation of cell septum assembly
GO:1901976 regulation of cell cycle checkpoint	1	0.008	Biological Process	GO:1901976	regulation of cell cycle checkpoint
GO:1901987 regulation of cell cycle phase transition	27	0.209	Biological Process	GO:1901987	regulation of cell cycle phase transition
GO:1901988 negative regulation of cell cycle phase transition	7	0.054	Biological Process	GO:1901988	negative regulation of cell cycle phase transition
GO:1901990 regulation of mitotic cell cycle phase transition	27	0.209	Biological Process	GO:1901990	regulation of mitotic cell cycle phase transition
GO:1901991 negative regulation of mitotic cell cycle phase transition	7	0.054	Biological Process	GO:1901991	negative regulation of mitotic cell cycle phase transition
GO:1902099 regulation of metaphase/anaphase transition of cell cycle	26	0.201	Biological Process	GO:1902099	regulation of metaphase/anaphase transition of cell cycle
GO:1902100 negative regulation of metaphase/anaphase transition of cell cycle	6	0.046	Biological Process	GO:1902100	negative regulation of metaphase/anaphase transition of cell cycle
GO:1902221 erythrose 4-phosphate/phosphoenolpyruvate family amino acid metabolic process	7	0.054	Biological Process	GO:1902221	erythrose 4-phosphate/phosphoenolpyruvate family amino acid metabolic process
GO:1902222 erythrose 4-phosphate/phosphoenolpyruvate family amino acid catabolic process	2	0.015	Biological Process	GO:1902222	erythrose 4-phosphate/phosphoenolpyruvate family amino acid catabolic process
GO:1902223 erythrose 4-phosphate/phosphoenolpyruvate family amino acid biosynthetic process	5	0.039	Biological Process	GO:1902223	erythrose 4-phosphate/phosphoenolpyruvate family amino acid biosynthetic process
GO:1902358 sulfate transmembrane transport	6	0.046	Biological Process	GO:1902358	sulfate transmembrane transport
GO:1902410 mitotic cytokinetic process	1	0.008	Biological Process	GO:1902410	mitotic cytokinetic process
GO:1902412 regulation of mitotic cytokinesis	1	0.008	Biological Process	GO:1902412	regulation of mitotic cytokinesis
GO:1902531 regulation of intracellular signal transduction	8	0.062	Biological Process	GO:1902531	regulation of intracellular signal transduction
GO:1902532 negative regulation of intracellular signal transduction	3	0.023	Biological Process	GO:1902532	negative regulation of intracellular signal transduction
GO:1902578 single-organism localization	1193	9.222	Biological Process	GO:1902578	single-organism localization
GO:1902580 single-organism cellular localization	46	0.356	Biological Process	GO:1902580	single-organism cellular localization
GO:1902582 single-organism intracellular transport	105	0.812	Biological Process	GO:1902582	single-organism intracellular transport
GO:1902589 single-organism organelle organization	171	1.322	Biological Process	GO:1902589	single-organism organelle organization
GO:1902591 single-organism membrane budding	1	0.008	Biological Process	GO:1902591	single-organism membrane budding
GO:1902593 single-organism nuclear import	10	0.077	Biological Process	GO:1902593	single-organism nuclear import
GO:1902600 hydrogen ion transmembrane transport	44	0.34	Biological Process	GO:1902600	hydrogen ion transmembrane transport
GO:1902644 tertiary alcohol metabolic process	2	0.015	Biological Process	GO:1902644	tertiary alcohol metabolic process
GO:1902645 tertiary alcohol biosynthetic process	2	0.015	Biological Process	GO:1902645	tertiary alcohol biosynthetic process
GO:1902679 negative regulation of RNA biosynthetic process	3	0.023	Biological Process	GO:1902679	negative regulation of RNA biosynthetic process
GO:1902680 positive regulation of RNA biosynthetic process	11	0.085	Biological Process	GO:1902680	positive regulation of RNA biosynthetic process
GO:1902749 regulation of cell cycle G2/M phase transition	1	0.008	Biological Process	GO:1902749	regulation of cell cycle G2/M phase transition
GO:1902750 negative regulation of cell cycle G2/M phase transition	1	0.008	Biological Process	GO:1902750	negative regulation of cell cycle G2/M phase transition
GO:1902882 regulation of response to oxidative stress	1	0.008	Biological Process	GO:1902882	regulation of response to oxidative stress
GO:1902884 positive regulation of response to oxidative stress	1	0.008	Biological Process	GO:1902884	positive regulation of response to oxidative stress
GO:1903046 meiotic cell cycle process	2	0.015	Biological Process	GO:1903046	meiotic cell cycle process
GO:1903047 mitotic cell cycle process	57	0.441	Biological Process	GO:1903047	mitotic cell cycle process
GO:1903050 regulation of proteolysis involved in cellular protein catabolic process	6	0.046	Biological Process	GO:1903050	regulation of proteolysis involved in cellular protein catabolic process
GO:1903051 negative regulation of proteolysis involved in cellular protein catabolic process	6	0.046	Biological Process	GO:1903051	negative regulation of proteolysis involved in cellular protein catabolic process
GO:1903311 regulation of mRNA metabolic process	2	0.015	Biological Process	GO:1903311	regulation of mRNA metabolic process
GO:1903320 regulation of protein modification by small protein conjugation or removal	6	0.046	Biological Process	GO:1903320	regulation of protein modification by small protein conjugation or removal
GO:1903321 negative regulation of protein modification by small protein conjugation or removal	6	0.046	Biological Process	GO:1903321	negative regulation of protein modification by small protein conjugation or removal
GO:1903362 regulation of cellular protein catabolic process	6	0.046	Biological Process	GO:1903362	regulation of cellular protein catabolic process
GO:1903363 negative regulation of cellular protein catabolic process	6	0.046	Biological Process	GO:1903363	negative regulation of cellular protein catabolic process
GO:1903409 reactive oxygen species biosynthetic process	1	0.008	Biological Process	GO:1903409	reactive oxygen species biosynthetic process
GO:1903436 regulation of mitotic cytokinetic process	1	0.008	Biological Process	GO:1903436	regulation of mitotic cytokinetic process
GO:1903504 regulation of mitotic spindle checkpoint	1	0.008	Biological Process	GO:1903504	regulation of mitotic spindle checkpoint
GO:1903506 regulation of nucleic acid-templated transcription	992	7.668	Biological Process	GO:1903506	regulation of nucleic acid-templated transcription
GO:1903507 negative regulation of nucleic acid-templated transcription	3	0.023	Biological Process	GO:1903507	negative regulation of nucleic acid-templated transcription
GO:1903508 positive regulation of nucleic acid-templated transcription	11	0.085	Biological Process	GO:1903508	positive regulation of nucleic acid-templated transcription
GO:1903509 liposaccharide metabolic process	26	0.201	Biological Process	GO:1903509	liposaccharide metabolic process
GO:1903825 organic acid transmembrane transport	30	0.232	Biological Process	GO:1903825	organic acid transmembrane transport
GO:1904029 regulation of cyclin-dependent protein kinase activity	5	0.039	Biological Process	GO:1904029	regulation of cyclin-dependent protein kinase activity
GO:1904666 regulation of ubiquitin protein ligase activity	6	0.046	Biological Process	GO:1904666	regulation of ubiquitin protein ligase activity
GO:1904667 negative regulation of ubiquitin protein ligase activity	6	0.046	Biological Process	GO:1904667	negative regulation of ubiquitin protein ligase activity
GO:1904833 positive regulation of removal of superoxide radicals	1	0.008	Biological Process	GO:1904833	positive regulation of removal of superoxide radicals
GO:1990542 mitochondrial transmembrane transport	8	0.062	Biological Process	GO:1990542	mitochondrial transmembrane transport
GO:1990748 cellular detoxification	1	0.008	Biological Process	GO:1990748	cellular detoxification
GO:2000026 regulation of multicellular organismal development	2	0.015	Biological Process	GO:2000026	regulation of multicellular organismal development
GO:2000031 regulation of salicylic acid mediated signaling pathway	49	0.379	Biological Process	GO:2000031	regulation of salicylic acid mediated signaling pathway
GO:2000038 regulation of stomatal complex development	1	0.008	Biological Process	GO:2000038	regulation of stomatal complex development
GO:2000104 negative regulation of DNA-dependent DNA replication	1	0.008	Biological Process	GO:2000104	negative regulation of DNA-dependent DNA replication
GO:2000112 regulation of cellular macromolecule biosynthetic process	1000	7.73	Biological Process	GO:2000112	regulation of cellular macromolecule biosynthetic process
GO:2000113 negative regulation of cellular macromolecule biosynthetic process	5	0.039	Biological Process	GO:2000113	negative regulation of cellular macromolecule biosynthetic process
GO:2000121 regulation of removal of superoxide radicals	1	0.008	Biological Process	GO:2000121	regulation of removal of superoxide radicals
GO:2000123 positive regulation of stomatal complex development	1	0.008	Biological Process	GO:2000123	positive regulation of stomatal complex development
GO:2000145 regulation of cell motility	1	0.008	Biological Process	GO:2000145	regulation of cell motility
GO:2000241 regulation of reproductive process	1	0.008	Biological Process	GO:2000241	regulation of reproductive process
GO:2000377 regulation of reactive oxygen species metabolic process	1	0.008	Biological Process	GO:2000377	regulation of reactive oxygen species metabolic process
GO:2000379 positive regulation of reactive oxygen species metabolic process	1	0.008	Biological Process	GO:2000379	positive regulation of reactive oxygen species metabolic process
GO:2000816 negative regulation of mitotic sister chromatid separation	6	0.046	Biological Process	GO:2000816	negative regulation of mitotic sister chromatid separation
GO:2001020 regulation of response to DNA damage stimulus	2	0.015	Biological Process	GO:2001020	regulation of response to DNA damage stimulus
GO:2001022 positive regulation of response to DNA damage stimulus	1	0.008	Biological Process	GO:2001022	positive regulation of response to DNA damage stimulus
GO:2001057 reactive nitrogen species metabolic process	3	0.023	Biological Process	GO:2001057	reactive nitrogen species metabolic process
GO:2001141 regulation of RNA biosynthetic process	992	7.668	Biological Process	GO:2001141	regulation of RNA biosynthetic process
GO:2001251 negative regulation of chromosome organization	6	0.046	Biological Process	GO:2001251	negative regulation of chromosome organization
GO:0000015 phosphopyruvate hydratase complex	5	0.122	Cellular Component	GO:0000015	phosphopyruvate hydratase complex
GO:0000123 histone acetyltransferase complex	12	0.293	Cellular Component	GO:0000123	histone acetyltransferase complex
GO:0000124 SAGA complex	1	0.024	Cellular Component	GO:0000124	SAGA complex
GO:0000126 transcription factor TFIIIB complex	2	0.049	Cellular Component	GO:0000126	transcription factor TFIIIB complex
GO:0000139 Golgi membrane	26	0.635	Cellular Component	GO:0000139	Golgi membrane
GO:0000145 exocyst	28	0.684	Cellular Component	GO:0000145	exocyst
GO:0000148 1,3-beta-D-glucan synthase complex	18	0.44	Cellular Component	GO:0000148	1,3-beta-D-glucan synthase complex
GO:0000151 ubiquitin ligase complex	32	0.781	Cellular Component	GO:0000151	ubiquitin ligase complex
GO:0000152 nuclear ubiquitin ligase complex	24	0.586	Cellular Component	GO:0000152	nuclear ubiquitin ligase complex
GO:0000153 cytoplasmic ubiquitin ligase complex	1	0.024	Cellular Component	GO:0000153	cytoplasmic ubiquitin ligase complex
GO:0000159 protein phosphatase type 2A complex	10	0.244	Cellular Component	GO:0000159	protein phosphatase type 2A complex
GO:0000172 ribonuclease MRP complex	1	0.024	Cellular Component	GO:0000172	ribonuclease MRP complex
GO:0000176 nuclear exosome (RNase complex)	1	0.024	Cellular Component	GO:0000176	nuclear exosome (RNase complex)
GO:0000178 exosome (RNase complex)	4	0.098	Cellular Component	GO:0000178	exosome (RNase complex)
GO:0000220 vacuolar proton-transporting V-type ATPase, V0 domain	4	0.098	Cellular Component	GO:0000220	vacuolar proton-transporting V-type ATPase, V0 domain
GO:0000221 vacuolar proton-transporting V-type ATPase, V1 domain	1	0.024	Cellular Component	GO:0000221	vacuolar proton-transporting V-type ATPase, V1 domain
GO:0000228 nuclear chromosome	36	0.879	Cellular Component	GO:0000228	nuclear chromosome
GO:0000275 mitochondrial proton-transporting ATP synthase complex, catalytic core F(1)	1	0.024	Cellular Component	GO:0000275	mitochondrial proton-transporting ATP synthase complex, catalytic core F(1)
GO:0000276 mitochondrial proton-transporting ATP synthase complex, coupling factor F(o)	5	0.122	Cellular Component	GO:0000276	mitochondrial proton-transporting ATP synthase complex, coupling factor F(o)
GO:0000313 organellar ribosome	1	0.024	Cellular Component	GO:0000313	organellar ribosome
GO:0000346 transcription export complex	1	0.024	Cellular Component	GO:0000346	transcription export complex
GO:0000347 THO complex	1	0.024	Cellular Component	GO:0000347	THO complex
GO:0000428 DNA-directed RNA polymerase complex	19	0.464	Cellular Component	GO:0000428	DNA-directed RNA polymerase complex
GO:0000439 core TFIIH complex	3	0.073	Cellular Component	GO:0000439	core TFIIH complex
GO:0000445 THO complex part of transcription export complex	1	0.024	Cellular Component	GO:0000445	THO complex part of transcription export complex
GO:0000502 proteasome complex	27	0.659	Cellular Component	GO:0000502	proteasome complex
GO:0000775 chromosome, centromeric region	8	0.195	Cellular Component	GO:0000775	chromosome, centromeric region
GO:0000776 kinetochore	4	0.098	Cellular Component	GO:0000776	kinetochore
GO:0000777 condensed chromosome kinetochore	1	0.024	Cellular Component	GO:0000777	condensed chromosome kinetochore
GO:0000779 condensed chromosome, centromeric region	1	0.024	Cellular Component	GO:0000779	condensed chromosome, centromeric region
GO:0000781 chromosome, telomeric region	4	0.098	Cellular Component	GO:0000781	chromosome, telomeric region
GO:0000782 telomere cap complex	3	0.073	Cellular Component	GO:0000782	telomere cap complex
GO:0000783 nuclear telomere cap complex	3	0.073	Cellular Component	GO:0000783	nuclear telomere cap complex
GO:0000784 nuclear chromosome, telomeric region	4	0.098	Cellular Component	GO:0000784	nuclear chromosome, telomeric region
GO:0000785 chromatin	49	1.197	Cellular Component	GO:0000785	chromatin
GO:0000786 nucleosome	40	0.977	Cellular Component	GO:0000786	nucleosome
GO:0000790 nuclear chromatin	9	0.22	Cellular Component	GO:0000790	nuclear chromatin
GO:0000793 condensed chromosome	26	0.635	Cellular Component	GO:0000793	condensed chromosome
GO:0000794 condensed nuclear chromosome	16	0.391	Cellular Component	GO:0000794	condensed nuclear chromosome
GO:0000796 condensin complex	3	0.073	Cellular Component	GO:0000796	condensin complex
GO:0000808 origin recognition complex	5	0.122	Cellular Component	GO:0000808	origin recognition complex
GO:0000835 ER ubiquitin ligase complex	1	0.024	Cellular Component	GO:0000835	ER ubiquitin ligase complex
GO:0000836 Hrd1p ubiquitin ligase complex	1	0.024	Cellular Component	GO:0000836	Hrd1p ubiquitin ligase complex
GO:0000922 spindle pole	7	0.171	Cellular Component	GO:0000922	spindle pole
GO:0000930 gamma-tubulin complex	1	0.024	Cellular Component	GO:0000930	gamma-tubulin complex
GO:0000940 condensed chromosome outer kinetochore	1	0.024	Cellular Component	GO:0000940	condensed chromosome outer kinetochore
GO:0005575 cellular_component	4095	100	Cellular Component	GO:0005575	cellular_component
GO:0005576 extracellular region	73	1.783	Cellular Component	GO:0005576	extracellular region
GO:0005615 extracellular space	7	0.171	Cellular Component	GO:0005615	extracellular space
GO:0005618 cell wall	117	2.857	Cellular Component	GO:0005618	cell wall
GO:0005622 intracellular	1935	47.253	Cellular Component	GO:0005622	intracellular
GO:0005623 cell	2085	50.916	Cellular Component	GO:0005623	cell
GO:0005634 nucleus	681	16.63	Cellular Component	GO:0005634	nucleus
GO:0005635 nuclear envelope	16	0.391	Cellular Component	GO:0005635	nuclear envelope
GO:0005637 nuclear inner membrane	1	0.024	Cellular Component	GO:0005637	nuclear inner membrane
GO:0005639 integral component of nuclear inner membrane	1	0.024	Cellular Component	GO:0005639	integral component of nuclear inner membrane
GO:0005643 nuclear pore	14	0.342	Cellular Component	GO:0005643	nuclear pore
GO:0005654 nucleoplasm	52	1.27	Cellular Component	GO:0005654	nucleoplasm
GO:0005657 replication fork	1	0.024	Cellular Component	GO:0005657	replication fork
GO:0005663 DNA replication factor C complex	1	0.024	Cellular Component	GO:0005663	DNA replication factor C complex
GO:0005664 nuclear origin of replication recognition complex	2	0.049	Cellular Component	GO:0005664	nuclear origin of replication recognition complex
GO:0005665 DNA-directed RNA polymerase II, core complex	3	0.073	Cellular Component	GO:0005665	DNA-directed RNA polymerase II, core complex
GO:0005666 DNA-directed RNA polymerase III complex	2	0.049	Cellular Component	GO:0005666	DNA-directed RNA polymerase III complex
GO:0005667 transcription factor complex	20	0.488	Cellular Component	GO:0005667	transcription factor complex
GO:0005669 transcription factor TFIID complex	5	0.122	Cellular Component	GO:0005669	transcription factor TFIID complex
GO:0005672 transcription factor TFIIA complex	1	0.024	Cellular Component	GO:0005672	transcription factor TFIIA complex
GO:0005674 transcription factor TFIIF complex	2	0.049	Cellular Component	GO:0005674	transcription factor TFIIF complex
GO:0005675 holo TFIIH complex	1	0.024	Cellular Component	GO:0005675	holo TFIIH complex
GO:0005680 anaphase-promoting complex	24	0.586	Cellular Component	GO:0005680	anaphase-promoting complex
GO:0005681 spliceosomal complex	14	0.342	Cellular Component	GO:0005681	spliceosomal complex
GO:0005684 U2-type spliceosomal complex	1	0.024	Cellular Component	GO:0005684	U2-type spliceosomal complex
GO:0005685 U1 snRNP	4	0.098	Cellular Component	GO:0005685	U1 snRNP
GO:0005694 chromosome	106	2.589	Cellular Component	GO:0005694	chromosome
GO:0005697 telomerase holoenzyme complex	1	0.024	Cellular Component	GO:0005697	telomerase holoenzyme complex
GO:0005730 nucleolus	5	0.122	Cellular Component	GO:0005730	nucleolus
GO:0005732 small nucleolar ribonucleoprotein complex	6	0.147	Cellular Component	GO:0005732	small nucleolar ribonucleoprotein complex
GO:0005737 cytoplasm	744	18.168	Cellular Component	GO:0005737	cytoplasm
GO:0005739 mitochondrion	91	2.222	Cellular Component	GO:0005739	mitochondrion
[truncated: 1,480 more rows]

## Sheet: Table S9
Table S9. Clustering results of gene families in the E. urograndis genome
Species	Genes number	Genes in families	Unclustered genes	Family number	Unique families	Average genes per family
E.urophylla ×grandis	32151	28078	4073	16822	142	1.67
P.patens	31134	21260	9874	9048	1724	2.35
P.trichocarpa	41009	33520	7489	14814	874	2.26
E.grandis	36050	28520	7530	16472	221	1.73
E.melliodora	38910	31212	7698	17538	272	1.78
E.pauciflora	38392	33978	4414	17429	499	1.95
V.vinifera	29291	22319	6972	13921	705	1.6
A.thaliana	27304	23526	3778	13050	742	1.8
T.cacao	21386	20156	1230	13984	179	1.44
Z.mays	39428	32554	6874	15872	1786	2.05
O.sativa	34527	24278	10249	15282	1175	1.59
S.tuberosum	38843	32086	6757	13347	1251	2.4
P.dactylifera	25348	22849	2499	12333	333	1.85

## Sheet: Table S10
Table S10. KEGG pathway analysis of the 131 expansion and contraction of gene families
#Pathway	fam.expan.0.05.id (773)	All-gene (25010)	Pvalue	Qvalue	Pathway ID	Level 1	Level 2	Genes	KOs
Metabolic pathways	179	4971	0.0124598	0.0518067	ko01100	Metabolism	Global and overview maps	weijuan_GLEAN_10000307;weijuan_GLEAN_10000309;weijuan_GLEAN_10000311;weijuan_GLEAN_10000462;weijuan_GLEAN_10000465;weijuan_GLEAN_10000467;weijuan_GLEAN_10000468;weijuan_GLEAN_10000585;weijuan_GLEAN_10000644;weijuan_GLEAN_10000646;weijuan_GLEAN_10000782;weijuan_GLEAN_10000954;weijuan_GLEAN_10001073;weijuan_GLEAN_10001375;weijuan_GLEAN_10001621;weijuan_GLEAN_10001635;weijuan_GLEAN_10002163;weijuan_…	K00083+K00660+K10527+K02335+K00695+K00863+K02434+K12309+K16818+K03006+K01681+K00914+K09754+K03696+K01251+K07407+K00130+K00939+K00106+K00128+K09842+K05277+K14379+K01194+K01785+K01213+K03183+K01184+K00122+K01183+K00630+K01610+K06123+K09841+K11147+K00059+K01176
Biosynthesis of secondary metabolites	81	3011	0.922912	1	ko01110	Metabolism	Global and overview maps	weijuan_GLEAN_10000307;weijuan_GLEAN_10000309;weijuan_GLEAN_10000311;weijuan_GLEAN_10000462;weijuan_GLEAN_10000465;weijuan_GLEAN_10000467;weijuan_GLEAN_10000468;weijuan_GLEAN_10000585;weijuan_GLEAN_10001621;weijuan_GLEAN_10002134;weijuan_GLEAN_10002354;weijuan_GLEAN_10002736;weijuan_GLEAN_10003523;weijuan_GLEAN_10003525;weijuan_GLEAN_10003526;weijuan_GLEAN_10003532;weijuan_GLEAN_10003533;weijuan_…	K00083+K00660+K10527+K16818+K16911+K01681+K09754+K00939+K13232+K00106+K00128+K09842+K05277+K01785+K03183+K00630+K01610+K09841
Protein processing in endoplasmic reticulum	63	1444	0.0037537	0.0197695	ko04141	Genetic Information Processing	Folding, sorting and degradation	weijuan_GLEAN_10000074;weijuan_GLEAN_10000143;weijuan_GLEAN_10000290;weijuan_GLEAN_10000642;weijuan_GLEAN_10000645;weijuan_GLEAN_10000774;weijuan_GLEAN_10000779;weijuan_GLEAN_10000783;weijuan_GLEAN_10000842;weijuan_GLEAN_10000845;weijuan_GLEAN_10000846;weijuan_GLEAN_10000847;weijuan_GLEAN_10000848;weijuan_GLEAN_10001975;weijuan_GLEAN_10003707;weijuan_GLEAN_10003716;weijuan_GLEAN_10007390;weijuan_…	K09518+K03283+K08852+K09490+K13525+K07953+K13993
ABC transporters	54	224	1.16216e-32	9.18106e-31	ko02010	Environmental Information Processing	Membrane transport	weijuan_GLEAN_10000058;weijuan_GLEAN_10000278;weijuan_GLEAN_10000279;weijuan_GLEAN_10000281;weijuan_GLEAN_10003168;weijuan_GLEAN_10003169;weijuan_GLEAN_10003170;weijuan_GLEAN_10003171;weijuan_GLEAN_10004365;weijuan_GLEAN_10004366;weijuan_GLEAN_10009753;weijuan_GLEAN_10009756;weijuan_GLEAN_10009757;weijuan_GLEAN_10011763;weijuan_GLEAN_10011765;weijuan_GLEAN_10011766;weijuan_GLEAN_10011767;weijuan_…	K05666+K05681+K05657+K05674+K05665
Starch and sucrose metabolism	41	630	7.01802e-06	6.16027e-05	ko00500	Metabolism	Carbohydrate metabolism	weijuan_GLEAN_10000782;weijuan_GLEAN_10002552;weijuan_GLEAN_10003751;weijuan_GLEAN_10005208;weijuan_GLEAN_10008325;weijuan_GLEAN_10011335;weijuan_GLEAN_10011861;weijuan_GLEAN_10011934;weijuan_GLEAN_10011935;weijuan_GLEAN_10011936;weijuan_GLEAN_10012553;weijuan_GLEAN_10013568;weijuan_GLEAN_10013722;weijuan_GLEAN_10017516;weijuan_GLEAN_10020165;weijuan_GLEAN_10023160;weijuan_GLEAN_10023162;weijuan_…	K00695+K19891+K01194+K01210+K01176
Galactose metabolism	38	356	3.56088e-11	4.68849e-10	ko00052	Metabolism	Carbohydrate metabolism	weijuan_GLEAN_10001375;weijuan_GLEAN_10002539;weijuan_GLEAN_10003597;weijuan_GLEAN_10006021;weijuan_GLEAN_10006049;weijuan_GLEAN_10007045;weijuan_GLEAN_10007152;weijuan_GLEAN_10007175;weijuan_GLEAN_10007176;weijuan_GLEAN_10007177;weijuan_GLEAN_10007257;weijuan_GLEAN_10007260;weijuan_GLEAN_10007262;weijuan_GLEAN_10007265;weijuan_GLEAN_10007750;weijuan_GLEAN_10008958;weijuan_GLEAN_10008959;weijuan_…	K12309+K07407+K01785
Sphingolipid metabolism	35	129	1.89924e-23	7.502e-22	ko00600	Metabolism	Lipid metabolism	weijuan_GLEAN_10001375;weijuan_GLEAN_10002539;weijuan_GLEAN_10003597;weijuan_GLEAN_10006021;weijuan_GLEAN_10006049;weijuan_GLEAN_10007045;weijuan_GLEAN_10007152;weijuan_GLEAN_10007175;weijuan_GLEAN_10007176;weijuan_GLEAN_10007177;weijuan_GLEAN_10007257;weijuan_GLEAN_10007260;weijuan_GLEAN_10007262;weijuan_GLEAN_10007265;weijuan_GLEAN_10007750;weijuan_GLEAN_10008958;weijuan_GLEAN_10008959;weijuan_…	K12309+K07407
Glycosphingolipid biosynthesis - ganglio series	27	69	3.58185e-23	9.43221e-22	ko00604	Metabolism	Glycan biosynthesis and metabolism	weijuan_GLEAN_10001375;weijuan_GLEAN_10002539;weijuan_GLEAN_10003597;weijuan_GLEAN_10006021;weijuan_GLEAN_10007045;weijuan_GLEAN_10007152;weijuan_GLEAN_10007175;weijuan_GLEAN_10007176;weijuan_GLEAN_10007177;weijuan_GLEAN_10007257;weijuan_GLEAN_10007260;weijuan_GLEAN_10007262;weijuan_GLEAN_10007265;weijuan_GLEAN_10007750;weijuan_GLEAN_10014028;weijuan_GLEAN_10014079;weijuan_GLEAN_10016452;weijuan_…	K12309
Glycosaminoglycan degradation	27	81	5.20139e-21	1.02727e-19	ko00531	Metabolism	Glycan biosynthesis and metabolism	weijuan_GLEAN_10001375;weijuan_GLEAN_10002539;weijuan_GLEAN_10003597;weijuan_GLEAN_10006021;weijuan_GLEAN_10007045;weijuan_GLEAN_10007152;weijuan_GLEAN_10007175;weijuan_GLEAN_10007176;weijuan_GLEAN_10007177;weijuan_GLEAN_10007257;weijuan_GLEAN_10007260;weijuan_GLEAN_10007262;weijuan_GLEAN_10007265;weijuan_GLEAN_10007750;weijuan_GLEAN_10014028;weijuan_GLEAN_10014079;weijuan_GLEAN_10016452;weijuan_…	K12309
Other glycan degradation	27	138	1.5377e-14	2.42957e-13	ko00511	Metabolism	Glycan biosynthesis and metabolism	weijuan_GLEAN_10001375;weijuan_GLEAN_10002539;weijuan_GLEAN_10003597;weijuan_GLEAN_10006021;weijuan_GLEAN_10007045;weijuan_GLEAN_10007152;weijuan_GLEAN_10007175;weijuan_GLEAN_10007176;weijuan_GLEAN_10007177;weijuan_GLEAN_10007257;weijuan_GLEAN_10007260;weijuan_GLEAN_10007262;weijuan_GLEAN_10007265;weijuan_GLEAN_10007750;weijuan_GLEAN_10014028;weijuan_GLEAN_10014079;weijuan_GLEAN_10016452;weijuan_…	K12309
Flavonoid biosynthesis	22	242	6.95808e-06	6.16027e-05	ko00941	Metabolism	Biosynthesis of other secondary metabolites	weijuan_GLEAN_10000462;weijuan_GLEAN_10000465;weijuan_GLEAN_10000467;weijuan_GLEAN_10000468;weijuan_GLEAN_10002736;weijuan_GLEAN_10004654;weijuan_GLEAN_10005983;weijuan_GLEAN_10009829;weijuan_GLEAN_10009832;weijuan_GLEAN_10009834;weijuan_GLEAN_10009836;weijuan_GLEAN_10009838;weijuan_GLEAN_10011601;weijuan_GLEAN_10011604;weijuan_GLEAN_10011605;weijuan_GLEAN_10011607;weijuan_GLEAN_10011609;weijuan_…	K00660+K09754+K05277
RNA transport	21	574	0.244062	0.621965	ko03013	Genetic Information Processing	Translation	weijuan_GLEAN_10000526;weijuan_GLEAN_10001214;weijuan_GLEAN_10001215;weijuan_GLEAN_10001216;weijuan_GLEAN_10001217;weijuan_GLEAN_10001218;weijuan_GLEAN_10001219;weijuan_GLEAN_10001220;weijuan_GLEAN_10001221;weijuan_GLEAN_10001223;weijuan_GLEAN_10005062;weijuan_GLEAN_10005063;weijuan_GLEAN_10005065;weijuan_GLEAN_10005066;weijuan_GLEAN_10005069;weijuan_GLEAN_10019475;weijuan_GLEAN_10022898;weijuan_…	K03231+K14299+K14298
Phenylpropanoid biosynthesis	20	653	0.548896	1	ko00940	Metabolism	Biosynthesis of other secondary metabolites	weijuan_GLEAN_10000307;weijuan_GLEAN_10000309;weijuan_GLEAN_10000311;weijuan_GLEAN_10002736;weijuan_GLEAN_10003523;weijuan_GLEAN_10003525;weijuan_GLEAN_10003526;weijuan_GLEAN_10003532;weijuan_GLEAN_10003533;weijuan_GLEAN_10003534;weijuan_GLEAN_10003535;weijuan_GLEAN_10003536;weijuan_GLEAN_10003538;weijuan_GLEAN_10003540;weijuan_GLEAN_10003542;weijuan_GLEAN_10019159;weijuan_GLEAN_10019161;weijuan_…	K00083+K09754
Ubiquitin mediated proteolysis	19	346	0.0117881	0.0517366	ko04120	Genetic Information Processing	Folding, sorting and degradation	weijuan_GLEAN_10011797;weijuan_GLEAN_10011798;weijuan_GLEAN_10011799;weijuan_GLEAN_10021693;weijuan_GLEAN_10021800;weijuan_GLEAN_10021801;weijuan_GLEAN_10021802;weijuan_GLEAN_10021803;weijuan_GLEAN_10024990;weijuan_GLEAN_10025003;weijuan_GLEAN_10025013;weijuan_GLEAN_10025014;weijuan_GLEAN_10025055;weijuan_GLEAN_10025060;weijuan_GLEAN_10025064;weijuan_GLEAN_10025069;weijuan_GLEAN_10025092;weijuan_…	K10592+K10591+K03351
Endocytosis	17	425	0.169217	0.452797	ko04144	Cellular Processes	Transport and catabolism	weijuan_GLEAN_10000290;weijuan_GLEAN_10003707;weijuan_GLEAN_10003716;weijuan_GLEAN_10007436;weijuan_GLEAN_10019552;weijuan_GLEAN_10021693;weijuan_GLEAN_10021800;weijuan_GLEAN_10021801;weijuan_GLEAN_10021802;weijuan_GLEAN_10021803;weijuan_GLEAN_10024692;weijuan_GLEAN_10024694;weijuan_GLEAN_10024697;weijuan_GLEAN_10025391;weijuan_GLEAN_10026067;weijuan_GLEAN_10027700;weijuan_GLEAN_10028146	K03283+K10591
Carbon metabolism	17	519	0.438175	0.961552	ko01200	Metabolism	Global and overview maps	weijuan_GLEAN_10000954;weijuan_GLEAN_10002163;weijuan_GLEAN_10002354;weijuan_GLEAN_10004808;weijuan_GLEAN_10005001;weijuan_GLEAN_10008869;weijuan_GLEAN_10010222;weijuan_GLEAN_10014004;weijuan_GLEAN_10022455;weijuan_GLEAN_10022456;weijuan_GLEAN_10022457;weijuan_GLEAN_10022458;weijuan_GLEAN_10022459;weijuan_GLEAN_10027896;weijuan_GLEAN_10027898;weijuan_GLEAN_10027899;weijuan_GLEAN_10029986	K00863+K01681+K00122+K01610
Oxidative phosphorylation	15	169	0.000253031	0.00153765	ko00190	Metabolism	Energy metabolism	weijuan_GLEAN_10010138;weijuan_GLEAN_10012351;weijuan_GLEAN_10012853;weijuan_GLEAN_10016867;weijuan_GLEAN_10019359;weijuan_GLEAN_10023042;weijuan_GLEAN_10023043;weijuan_GLEAN_10023044;weijuan_GLEAN_10023046;weijuan_GLEAN_10023047;weijuan_GLEAN_10023048;weijuan_GLEAN_10023049;weijuan_GLEAN_10025438;weijuan_GLEAN_10027759;weijuan_GLEAN_10028176	K01507
Spliceosome	15	479	0.516324	1	ko03040	Genetic Information Processing	Transcription	weijuan_GLEAN_10000290;weijuan_GLEAN_10003707;weijuan_GLEAN_10003716;weijuan_GLEAN_10007436;weijuan_GLEAN_10009986;weijuan_GLEAN_10009987;weijuan_GLEAN_10011900;weijuan_GLEAN_10019552;weijuan_GLEAN_10024692;weijuan_GLEAN_10024694;weijuan_GLEAN_10024697;weijuan_GLEAN_10025391;weijuan_GLEAN_10026067;weijuan_GLEAN_10027700;weijuan_GLEAN_10028146	K03283+K12854
Circadian rhythm - plant	14	181	0.00155033	0.00874828	ko04712	Organismal Systems	Environmental adaptation	weijuan_GLEAN_10000462;weijuan_GLEAN_10000465;weijuan_GLEAN_10000467;weijuan_GLEAN_10000468;weijuan_GLEAN_10004654;weijuan_GLEAN_10005983;weijuan_GLEAN_10009829;weijuan_GLEAN_10009832;weijuan_GLEAN_10009834;weijuan_GLEAN_10009836;weijuan_GLEAN_10009838;weijuan_GLEAN_10015224;weijuan_GLEAN_10029236;weijuan_GLEAN_10031080	K00660+K12126
Glycerolipid metabolism	14	253	0.0263633	0.099176	ko00561	Metabolism	Lipid metabolism	weijuan_GLEAN_10000954;weijuan_GLEAN_10002163;weijuan_GLEAN_10006049;weijuan_GLEAN_10008958;weijuan_GLEAN_10008959;weijuan_GLEAN_10008960;weijuan_GLEAN_10010441;weijuan_GLEAN_10010998;weijuan_GLEAN_10010999;weijuan_GLEAN_10024437;weijuan_GLEAN_10024438;weijuan_GLEAN_10027053;weijuan_GLEAN_10028144;weijuan_GLEAN_10030439	K00863+K07407+K00128+K00630
Zeatin biosynthesis	12	93	2.93721e-05	0.00023204	ko00908	Metabolism	Metabolism of terpenoids and polyketides	weijuan_GLEAN_10004888;weijuan_GLEAN_10004890;weijuan_GLEAN_10004891;weijuan_GLEAN_10004892;weijuan_GLEAN_10004894;weijuan_GLEAN_10004895;weijuan_GLEAN_10004897;weijuan_GLEAN_10007682;weijuan_GLEAN_10018512;weijuan_GLEAN_10020219;weijuan_GLEAN_10020221;weijuan_GLEAN_10032151	K00279
Glyoxylate and dicarboxylate metabolism	12	161	0.00439791	0.0217147	ko00630	Metabolism	Carbohydrate metabolism	weijuan_GLEAN_10002354;weijuan_GLEAN_10004808;weijuan_GLEAN_10005001;weijuan_GLEAN_10008869;weijuan_GLEAN_10010222;weijuan_GLEAN_10014004;weijuan_GLEAN_10022455;weijuan_GLEAN_10022456;weijuan_GLEAN_10022457;weijuan_GLEAN_10022458;weijuan_GLEAN_10022459;weijuan_GLEAN_10029986	K01681+K00122
Phagosome	11	194	0.0392732	0.138739	ko04145	Cellular Processes	Transport and catabolism	weijuan_GLEAN_10001342;weijuan_GLEAN_10001607;weijuan_GLEAN_10002587;weijuan_GLEAN_10010862;weijuan_GLEAN_10014930;weijuan_GLEAN_10018443;weijuan_GLEAN_10021358;weijuan_GLEAN_10021934;weijuan_GLEAN_10028409;weijuan_GLEAN_10031257;weijuan_GLEAN_10031259	K07375+K00914
mRNA surveillance pathway	11	341	0.485621	1	ko03015	Genetic Information Processing	Translation	weijuan_GLEAN_10011142;weijuan_GLEAN_10011643;weijuan_GLEAN_10011645;weijuan_GLEAN_10011650;weijuan_GLEAN_10011652;weijuan_GLEAN_10011655;weijuan_GLEAN_10011656;weijuan_GLEAN_10020739;weijuan_GLEAN_10020740;weijuan_GLEAN_10020741;weijuan_GLEAN_10020742	K14407
Purine metabolism	11	392	0.66993	1	ko00230	Metabolism	Nucleotide metabolism	weijuan_GLEAN_10000644;weijuan_GLEAN_10000646;weijuan_GLEAN_10002310;weijuan_GLEAN_10002311;weijuan_GLEAN_10008336;weijuan_GLEAN_10008361;weijuan_GLEAN_10008371;weijuan_GLEAN_10010433;weijuan_GLEAN_10010434;weijuan_GLEAN_10010436;weijuan_GLEAN_10010437	K02335+K03006+K00939+K00106
Citrate cycle (TCA cycle)	10	76	0.000113572	0.000815654	ko00020	Metabolism	Carbohydrate metabolism	weijuan_GLEAN_10002354;weijuan_GLEAN_10004808;weijuan_GLEAN_10005001;weijuan_GLEAN_10008869;weijuan_GLEAN_10010222;weijuan_GLEAN_10014004;weijuan_GLEAN_10027896;weijuan_GLEAN_10027898;weijuan_GLEAN_10027899;weijuan_GLEAN_10029986	K01681+K01610
Pyruvate metabolism	10	181	0.0552209	0.174498	ko00620	Metabolism	Carbohydrate metabolism	weijuan_GLEAN_10000955;weijuan_GLEAN_10001487;weijuan_GLEAN_10005472;weijuan_GLEAN_10008369;weijuan_GLEAN_10010441;weijuan_GLEAN_10015686;weijuan_GLEAN_10027896;weijuan_GLEAN_10027898;weijuan_GLEAN_10027899;weijuan_GLEAN_10028789	K18881+K00128+K01610
Cysteine and methionine metabolism	9	229	0.278593	0.666936	ko00270	Metabolism	Amino acid metabolism	weijuan_GLEAN_10004876;weijuan_GLEAN_10004877;weijuan_GLEAN_10004878;weijuan_GLEAN_10004879;weijuan_GLEAN_10004880;weijuan_GLEAN_10004881;weijuan_GLEAN_10004882;weijuan_GLEAN_10026649;weijuan_GLEAN_10031169	K01251
Ribosome	9	420	0.904854	1	ko03010	Genetic Information Processing	Translation	weijuan_GLEAN_10002394;weijuan_GLEAN_10005879;weijuan_GLEAN_10012740;weijuan_GLEAN_10014631;weijuan_GLEAN_10017334;weijuan_GLEAN_10017335;weijuan_GLEAN_10017701;weijuan_GLEAN_10020748;weijuan_GLEAN_10026515	K02958+K02880+K02868
MAPK signaling pathway - plant	9	764	0.99986	1	ko04016	Environmental Information Processing	Signal transduction	weijuan_GLEAN_10009035;weijuan_GLEAN_10010428;weijuan_GLEAN_10010429;weijuan_GLEAN_10010547;weijuan_GLEAN_10018416;weijuan_GLEAN_10019174;weijuan_GLEAN_10019815;weijuan_GLEAN_10026759;weijuan_GLEAN_10028399	K02183+K17686
Glycosphingolipid biosynthesis - globo and isoglobo series	8	26	7.65647e-07	8.64087e-06	ko00603	Metabolism	Glycan biosynthesis and metabolism	weijuan_GLEAN_10006049;weijuan_GLEAN_10008958;weijuan_GLEAN_10008959;weijuan_GLEAN_10008960;weijuan_GLEAN_10010998;weijuan_GLEAN_10010999;weijuan_GLEAN_10024437;weijuan_GLEAN_10024438	K07407
Fatty acid degradation	8	85	0.00476651	0.0221503	ko00071	Metabolism	Lipid metabolism	weijuan_GLEAN_10000585;weijuan_GLEAN_10010441;weijuan_GLEAN_10016994;weijuan_GLEAN_10016995;weijuan_GLEAN_10016996;weijuan_GLEAN_10020359;weijuan_GLEAN_10020360;weijuan_GLEAN_10020364	K10527+K00128
Fatty acid metabolism	8	125	0.0403923	0.138739	ko01212	Metabolism	Global and overview maps	weijuan_GLEAN_10000585;weijuan_GLEAN_10016994;weijuan_GLEAN_10016995;weijuan_GLEAN_10016996;weijuan_GLEAN_10020359;weijuan_GLEAN_10020360;weijuan_GLEAN_10020364;weijuan_GLEAN_10028125	K10527+K00059
alpha-Linolenic acid metabolism	8	128	0.0453928	0.149418	ko00592	Metabolism	Lipid metabolism	weijuan_GLEAN_10000585;weijuan_GLEAN_10001621;weijuan_GLEAN_10016994;weijuan_GLEAN_10016995;weijuan_GLEAN_10016996;weijuan_GLEAN_10020359;weijuan_GLEAN_10020360;weijuan_GLEAN_10020364	K10527+K16818
Phosphatidylinositol signaling system	8	174	0.171948	0.452797	ko04070	Environmental Information Processing	Signal transduction	weijuan_GLEAN_10002587;weijuan_GLEAN_10009035;weijuan_GLEAN_10010547;weijuan_GLEAN_10018416;weijuan_GLEAN_10019174;weijuan_GLEAN_10021358;weijuan_GLEAN_10031257;weijuan_GLEAN_10031259	K00914+K02183
2-Oxocarboxylic acid metabolism	7	144	0.159017	0.448656	ko01210	Metabolism	Global and overview maps	weijuan_GLEAN_10002354;weijuan_GLEAN_10004808;weijuan_GLEAN_10005001;weijuan_GLEAN_10008869;weijuan_GLEAN_10010222;weijuan_GLEAN_10014004;weijuan_GLEAN_10029986	K01681
Peroxisome	7	192	0.382898	0.864256	ko04146	Cellular Processes	Transport and catabolism	weijuan_GLEAN_10008101;weijuan_GLEAN_10008103;weijuan_GLEAN_10010433;weijuan_GLEAN_10010434;weijuan_GLEAN_10010436;weijuan_GLEAN_10010437;weijuan_GLEAN_10028119	K13338+K00106+K11147
Glycerophospholipid metabolism	7	211	0.478478	1	ko00564	Metabolism	Lipid metabolism	weijuan_GLEAN_10001621;weijuan_GLEAN_10027053;weijuan_GLEAN_10028119;weijuan_GLEAN_10028124;weijuan_GLEAN_10028125;weijuan_GLEAN_10028144;weijuan_GLEAN_10030439	K16818+K00630+K06123
Glycolysis / Gluconeogenesis	7	289	0.792842	1	ko00010	Metabolism	Carbohydrate metabolism	weijuan_GLEAN_10010441;weijuan_GLEAN_10016896;weijuan_GLEAN_10016899;weijuan_GLEAN_10016901;weijuan_GLEAN_10027896;weijuan_GLEAN_10027898;weijuan_GLEAN_10027899	K00128+K01785+K01610
Biosynthesis of amino acids	7	507	0.995791	1	ko01230	Metabolism	Global and overview maps	weijuan_GLEAN_10002354;weijuan_GLEAN_10004808;weijuan_GLEAN_10005001;weijuan_GLEAN_10008869;weijuan_GLEAN_10010222;weijuan_GLEAN_10014004;weijuan_GLEAN_10029986	K01681
Plant-pathogen interaction	7	1210	1	1	ko04626	Organismal Systems	Environmental adaptation	weijuan_GLEAN_10000102;weijuan_GLEAN_10002291;weijuan_GLEAN_10009035;weijuan_GLEAN_10010547;weijuan_GLEAN_10011414;weijuan_GLEAN_10018416;weijuan_GLEAN_10019174	K13436+K02183
Autophagy - other	6	70	0.021051	0.0831515	ko04136	Cellular Processes	Transport and catabolism	weijuan_GLEAN_10001114;weijuan_GLEAN_10002587;weijuan_GLEAN_10005392;weijuan_GLEAN_10021358;weijuan_GLEAN_10031257;weijuan_GLEAN_10031259	K08266+K00914
Base excision repair	6	112	0.133738	0.391307	ko03410	Genetic Information Processing	Replication and repair	weijuan_GLEAN_10000365;weijuan_GLEAN_10000644;weijuan_GLEAN_10000646;weijuan_GLEAN_10008336;weijuan_GLEAN_10008371;weijuan_GLEAN_10018504	K01142+K02335
Pyrimidine metabolism	6	321	0.934096	1	ko00240	Metabolism	Nucleotide metabolism	weijuan_GLEAN_10000644;weijuan_GLEAN_10000646;weijuan_GLEAN_10002310;weijuan_GLEAN_10002311;weijuan_GLEAN_10008336;weijuan_GLEAN_10008371	K02335+K03006
Stilbenoid, diarylheptanoid and gingerol biosynthesis	5	176	0.6374	1	ko00945	Metabolism	Biosynthesis of other secondary metabolites	weijuan_GLEAN_10002736;weijuan_GLEAN_10009834;weijuan_GLEAN_10019159;weijuan_GLEAN_10019161;weijuan_GLEAN_10019163	K09754+K13232
DNA replication	5	202	0.751638	1	ko03030	Genetic Information Processing	Replication and repair	weijuan_GLEAN_10000644;weijuan_GLEAN_10000646;weijuan_GLEAN_10008336;weijuan_GLEAN_10008371;weijuan_GLEAN_10027998	K02335+K02540
Caffeine metabolism	4	10	0.000163859	0.00107874	ko00232	Metabolism	Biosynthesis of other secondary metabolites	weijuan_GLEAN_10010433;weijuan_GLEAN_10010434;weijuan_GLEAN_10010436;weijuan_GLEAN_10010437	K00106
SNARE interactions in vesicular transport	4	55	0.0898807	0.273099	ko04130	Genetic Information Processing	Folding, sorting and degradation	weijuan_GLEAN_10004776;weijuan_GLEAN_10010269;weijuan_GLEAN_10019211;weijuan_GLEAN_10028308	K08496+K08497
Carotenoid biosynthesis	4	152	0.695003	1	ko00906	Metabolism	Metabolism of terpenoids and polyketides	weijuan_GLEAN_10010573;weijuan_GLEAN_10028119;weijuan_GLEAN_10028124;weijuan_GLEAN_10028125	K09842+K09841
Inositol phosphate metabolism	4	154	0.704707	1	ko00562	Metabolism	Carbohydrate metabolism	weijuan_GLEAN_10002587;weijuan_GLEAN_10021358;weijuan_GLEAN_10031257;weijuan_GLEAN_10031259	K00914
Nucleotide excision repair	4	170	0.774298	1	ko03420	Genetic Information Processing	Replication and repair	weijuan_GLEAN_10000644;weijuan_GLEAN_10000646;weijuan_GLEAN_10008336;weijuan_GLEAN_10008371	K02335
Aminoacyl-tRNA biosynthesis	4	206	0.883548	1	ko00970	Genetic Information Processing	Translation	weijuan_GLEAN_10001073;weijuan_GLEAN_10001635;weijuan_GLEAN_10017159;weijuan_GLEAN_10021543	K02434
Homologous recombination	4	222	0.915052	1	ko03440	Genetic Information Processing	Replication and repair	weijuan_GLEAN_10000644;weijuan_GLEAN_10000646;weijuan_GLEAN_10008336;weijuan_GLEAN_10008371	K02335
Pentose and glucuronate interconversions	4	328	0.991703	1	ko00040	Metabolism	Carbohydrate metabolism	weijuan_GLEAN_10018566;weijuan_GLEAN_10018567;weijuan_GLEAN_10021359;weijuan_GLEAN_10021366	K01213+K01184
Nitrogen metabolism	3	57	0.258043	0.637043	ko00910	Metabolism	Energy metabolism	weijuan_GLEAN_10001357;weijuan_GLEAN_10002834;weijuan_GLEAN_10006006	K10534
Ether lipid metabolism	3	90	0.529441	1	ko00565	Metabolism	Lipid metabolism	weijuan_GLEAN_10028119;weijuan_GLEAN_10028124;weijuan_GLEAN_10028125	K06123
Ubiquinone and other terpenoid-quinone biosynthesis	3	99	0.594196	1	ko00130	Metabolism	Metabolism of cofactors and vitamins	weijuan_GLEAN_10021108;weijuan_GLEAN_10021109;weijuan_GLEAN_10021110	K03183
Terpenoid backbone biosynthesis	3	108	0.652876	1	ko00900	Metabolism	Metabolism of terpenoids and polyketides	weijuan_GLEAN_10011502;weijuan_GLEAN_10027904;weijuan_GLEAN_10027913	K15892
Carbon fixation in photosynthetic organisms	3	112	0.676926	1	ko00710	Metabolism	Energy metabolism	weijuan_GLEAN_10027896;weijuan_GLEAN_10027898;weijuan_GLEAN_10027899	K01610
Glycine, serine and threonine metabolism	3	154	0.858593	1	ko00260	Metabolism	Amino acid metabolism	weijuan_GLEAN_10007325;weijuan_GLEAN_10007329;weijuan_GLEAN_10016854	K00130
RNA degradation	3	427	0.999852	1	ko03018	Genetic Information Processing	Folding, sorting and degradation	weijuan_GLEAN_10005705;weijuan_GLEAN_10019386;weijuan_GLEAN_10023255	K04043+K03514
Riboflavin metabolism	2	41	0.363073	0.84361	ko00740	Metabolism	Metabolism of cofactors and vitamins	weijuan_GLEAN_10011655;weijuan_GLEAN_10011656	K14379
Protein export	2	64	0.59257	1	ko03060	Genetic Information Processing	Folding, sorting and degradation	weijuan_GLEAN_10001975;weijuan_GLEAN_10011941	K09490
Fructose and mannose metabolism	2	144	0.939662	1	ko00051	Metabolism	Carbohydrate metabolism	weijuan_GLEAN_10000954;weijuan_GLEAN_10002163	K00863
Glutathione metabolism	2	171	0.9703	1	ko00480	Metabolism	Metabolism of other amino acids	weijuan_GLEAN_10014745;weijuan_GLEAN_10014749	K00799
RNA polymerase	2	189	0.981683	1	ko03020	Genetic Information Processing	Transcription	weijuan_GLEAN_10002310;weijuan_GLEAN_10002311	K03006
Amino sugar and nucleotide sugar metabolism	2	286	0.998777	1	ko00520	Metabolism	Carbohydrate metabolism	weijuan_GLEAN_10026349;weijuan_GLEAN_10026352	K01183
Thiamine metabolism	1	30	0.610315	1	ko00730	Metabolism	Metabolism of cofactors and vitamins	weijuan_GLEAN_10008361	K00939
Histidine metabolism	1	34	0.656359	1	ko00340	Metabolism	Amino acid metabolism	weijuan_GLEAN_10010441	K00128
Biotin metabolism	1	36	0.677302	1	ko00780	Metabolism	Metabolism of cofactors and vitamins	weijuan_GLEAN_10028125	K00059
Biosynthesis of unsaturated fatty acids	1	67	0.878314	1	ko01040	Metabolism	Lipid metabolism	weijuan_GLEAN_10028125	K00059
Lysine degradation	1	78	0.913937	1	ko00310	Metabolism	Amino acid metabolism	weijuan_GLEAN_10010441	K00128
Fatty acid biosynthesis	1	83	0.926477	1	ko00061	Metabolism	Lipid metabolism	weijuan_GLEAN_10028125	K00059
beta-Alanine metabolism	1	98	0.95417	1	ko00410	Metabolism	Metabolism of other amino acids	weijuan_GLEAN_10010441	K00128
Tryptophan metabolism	1	105	0.963245	1	ko00380	Metabolism	Amino acid metabolism	weijuan_GLEAN_10010441	K00128
Valine, leucine and isoleucine degradation	1	112	0.970526	1	ko00280	Metabolism	Amino acid metabolism	weijuan_GLEAN_10010441	K00128
Arginine and proline metabolism	1	119	0.976365	1	ko00330	Metabolism	Amino acid metabolism	weijuan_GLEAN_10010441	K00128
Ascorbate and aldarate metabolism	1	148	0.990538	1	ko00053	Metabolism	Carbohydrate metabolism	weijuan_GLEAN_10010441	K00128
Plant hormone signal transduction	1	768	1	1	ko04075	Environmental Information Processing	Signal transduction	weijuan_GLEAN_10015224	K12126

[truncated: 3 more sheets: Table S11, Table S12, Sheet2]
